# Supplementary material for: PRAM: a novel pooling approach for discovering intergenic transcripts from large-scale RNA sequencing experiments
Source: HighWire-hosted journal article supplement (doi:10.1101/gr.252445.119), 2020-09-21
Supplement: Supplemental_Material.pdf [file Supplemental_Material.pdf]

# PRAM: a novel pooling approach for discovering intergenic transcripts from large-scale RNA sequencing experiments

Peng Liu, Alexandra A. Soukup, Emery H. Bresnick, Colin N. Dewey, Sündüz Keleş

## List of Supplementary Notes

|                                                                                                                                         |    |
|-----------------------------------------------------------------------------------------------------------------------------------------|----|
| Supplementary Note 1. Cufflinks-predicted models have false positive splice junctions. ....                                             | 4  |
| Supplementary Note 2. Benchmark on simulated RNA-seq data containing noise.....                                                         | 5  |
| Supplementary Note 3. ‘1-Step’ methods predicted a very small number of chimeric transcripts.....                                       | 6  |
| Supplementary Note 4. PRAM has competitive time and memory cost for intergenic transcript discovery. ....                               | 8  |
| Supplementary Note 5. PRAM transcripts are unlikely to be eRNAs or uROFs.....                                                           | 9  |
| Supplementary Note 6. Protein-coding potential of PRAM transcripts. ....                                                                | 10 |
| Supplementary Note 7. Transcripts predicted uniquely by ‘1-Step’ methods were supported by RAMPAGE and histone mark ChIP-seq data. .... | 11 |
| Supplementary Note 8. ‘2-Step’ methods and Cufflinks missed validated ‘1-Step’ mouse models.....                                        | 12 |
| Supplementary Note 9. Gene model CUFP.chr7.6106 was not expressed in K562. ....                                                         | 13 |

## List of Supplementary Tables

|                                                                                                                                                        |    |
|--------------------------------------------------------------------------------------------------------------------------------------------------------|----|
| Supplementary Table 1. ENCODE human RNA-seq datasets for benchmark test. ....                                                                          | 14 |
| Supplementary Table 2. Number of false positive splice junctions by ‘1-Step’ and ‘2-Step’ methods. ....                                                | 15 |
| Supplementary Table 3. Number of transcripts missed by ‘1-Step’ and ‘2-Step’ methods in benchmark test. ..                                             | 16 |
| Supplementary Table 4. Number of atypical target transcripts and predicted models. ....                                                                | 17 |
| Supplementary Table 5. Number of ‘newly discovered’ transcripts with potential to give rise of predicted chimeric transcripts.....                     | 18 |
| Supplementary Table 6. ENCODE human tissue RNA-seq datasets. ....                                                                                      | 19 |
| Supplementary Table 7. Number of RNA-seq alignments before and after filtering for intergenic regions.....                                             | 21 |
| Supplementary Table 8. RNA-seq BAM file sizes before and after filtering fragments for intergenic regions....                                          | 22 |
| Supplementary Table 9. Computing time and memory usage for ‘1-Step’ and ‘2-Step’ methods. ....                                                         | 23 |
| Supplementary Table 10. TPMs of two ‘eliminated’ PRAM transcripts in the 30 ENCODE RNA-seq datasets. 24                                                |    |
| Supplementary Table 11. Number of PRAM transcripts before and after elimination. ....                                                                  | 25 |
| Supplementary Table 12. Number of GENCODE and PRAM transcripts by TPM range.....                                                                       | 26 |
| Supplementary Table 13. ENCODE RAMPAGE bigWig files.....                                                                                               | 27 |
| Supplementary Table 14. ENCODE histone modification ChIP-seq datasets.....                                                                             | 28 |
| Supplementary Table 15. Number of conserved GENCODE and PRAM transcripts.....                                                                          | 29 |
| Supplementary Table 16. Number of BLAST-matched proteins for PRAM transcripts. ....                                                                    | 30 |
| Supplementary Table 17. PRAM transcript plcf_chr2_minus.9034.1’s matched proteins by BLAST.....                                                        | 31 |
| Supplementary Table 18. PRAM transcript plcf_chr2_minus.9034.2’s matched proteins by BLAST.....                                                        | 35 |
| Supplementary Table 19. Number of PRAM transcripts stratified by the fractions of their exons that overlap with PhyloCSF-predicted coding regions..... | 39 |

|                                                                                                                           |    |
|---------------------------------------------------------------------------------------------------------------------------|----|
| Supplementary Table 20. Number of human transcripts predicted by ‘1-Step’ and ‘2-Step’ methods. ....                      | 40 |
| Supplementary Table 21. Hematopoietic mouse ENCODE RNA-seq datasets. ....                                                 | 41 |
| Supplementary Table 22. Mouse hematopoiesis-related RNA-seq datasets. ....                                                | 42 |
| Supplementary Table 23. Number of selected PRAM mouse gene and transcript models. ....                                    | 43 |
| Supplementary Table 24. GATA2 and TAL1 mouse ChIP-seq datasets. ....                                                      | 44 |
| Supplementary Table 25. PCR primers and their sequences. ....                                                             | 46 |
| Supplementary Table 26. Expression levels of the six PRAM gene models. ....                                               | 48 |
| Supplementary Table 27. Number of ‘2-Step’ and Cufflinks models overlapping with the four validated ‘1-Step’ models. .... | 49 |
| Supplementary Table 28. ‘2-Step’ methods and Cufflinks missed two of the four validated ‘1-Step’ models. ...              | 50 |
| Supplementary Table 29. Protein-coding potential of PRAM mouse transcripts. ....                                          | 51 |
| Supplementary Table 30. ENCODE K562 RNA-seq datasets. ....                                                                | 52 |
| Supplementary Table 31. Protein-coding potential of PRAM mouse transcript’s human counterpart. ....                       | 54 |
| Supplementary Table 32. GATA2 and TAL1 human ChIP-seq datasets. ....                                                      | 55 |

## List of Supplementary Figures

|                                                                                                                                                                                                                                 |    |
|---------------------------------------------------------------------------------------------------------------------------------------------------------------------------------------------------------------------------------|----|
| Supplementary Figure 1. Distribution of genes with ‘newly discovered’ transcripts. ....                                                                                                                                         | 56 |
| Supplementary Figure 2. Benchmark results of Cufflinks, StringTie, ‘1-Step’ and ‘2-Step’ methods. ....                                                                                                                          | 57 |
| Supplementary Figure 3. Distribution of shift for false positive junctions by Cufflinks-based methods. ....                                                                                                                     | 58 |
| Supplementary Figure 4. An example of shifted 5'- and 3'-splice sites by Cufflinks-based methods. ....                                                                                                                          | 59 |
| Supplementary Figure 5. Transcript structures missed by ‘2-Step’, but predicted by ‘1-Step’ methods. ....                                                                                                                       | 60 |
| Supplementary Figure 6. Input alignments from the 30 RNA-seq datasets for <i>GCM1</i> . ....                                                                                                                                    | 61 |
| Supplementary Figure 7. UCSC Genome Browser screenshot of a benchmark transcript that had transcript structure predicted by both ‘1-Step’ methods and missed by all three ‘2-Step’ methods on simulated RNA-seq fragments. .... | 62 |
| Supplementary Figure 8. Percentage of simulated RNA-seq reads that mapped to noisy models and were shared by ‘non-noisy’ models. ....                                                                                           | 63 |
| Supplementary Figure 9. Comparison of expression levels for noisy and correctly detected transcript models. ....                                                                                                                | 64 |
| Supplementary Figure 10. Comparison of 1-Step and 2-Step methods on simulated RNA-seq fragments based on parameters learned from the 30 ENCODE datasets. ....                                                                   | 65 |
| Supplementary Figure 11. 40 ENCODE RNA-seq datasets were grouped into five clusters by K-means clustering. ....                                                                                                                 | 66 |
| Supplementary Figure 12. Number of predicted chimeric transcripts by ‘1-Step’ and ‘2-Step’ methods using different number of input RNA-seq datasets. ....                                                                       | 67 |
| Supplementary Figure 13. Computing time and memory usage for ‘1-Step’ method predictions on different number of input RNA-seq datasets. ....                                                                                    | 68 |
| Supplementary Figure 14. Number of target transcripts not detected by ‘1-Step’ methods under different number of input RNA-seq datasets. ....                                                                                   | 69 |
| Supplementary Figure 15. Precision and recall on the 780 target transcripts with predicted models under all combinations of the five different numbers of input RNA-seq datasets and two ‘1-Step’ methods. ....                 | 70 |
| Supplementary Figure 16. Distribution of GENCODE and PRAM transcripts by their maximum TPMs. ....                                                                                                                               | 71 |

|                                                                                                                                                                           |     |
|---------------------------------------------------------------------------------------------------------------------------------------------------------------------------|-----|
| Supplementary Figure 17. Distribution of GENCODE and PRAM transcripts stratified by their average expression levels in the seven cell lines. ....                         | 72  |
| Supplementary Figure 18. The second highly expressed PRAM transcript with supported genomic features. .                                                                   | 73  |
| Supplementary Figure 19. Numbers and lengths of GENCODE and PRAM transcript exon and introns. ....                                                                        | 74  |
| Supplementary Figure 20. Fraction of exon nucleotides that overlapped with repeats. ....                                                                                  | 75  |
| Supplementary Figure 21. Lengths of PRAM transcripts and FANTOM5 enhancers. ....                                                                                          | 76  |
| Supplementary Figure 22. RAMPAGE signals of human GENCODE and PRAM transcripts. ....                                                                                      | 77  |
| Supplementary Figure 23. Transcription-associated epigenetic signals of human GENCODE and PRAM transcripts as well as silent regions as negative control. ....            | 78  |
| Supplementary Figure 24. UCSC Genome Browser screenshot of a recently updated GENCODE transcript overlapped with PRAM transcripts. ....                                   | 79  |
| Supplementary Figure 25. The phastCons scores of GENCODE and PRAM human transcripts. ....                                                                                 | 80  |
| Supplementary Figure 26. Percentage of PRAM and GENCODE 'newly discovered' transcripts stratified by the number of BLAST-matched proteins. ....                           | 81  |
| Supplementary Figure 27. Percentage of uncertain BLAST-matched proteins for the 41 PRAM transcripts. ....                                                                 | 82  |
| Supplementary Figure 28. Comparison of ORF lengths between GENCODE and the 41 PRAM transcripts. ....                                                                      | 83  |
| Supplementary Figure 29. PhyloCSF scores of PRAM transcripts' predicted ORFs. ....                                                                                        | 84  |
| Supplementary Figure 30. UCSC Genome Browser screenshot of two of the 41 PRAM transcripts, their predicted ORFs and PhyloCSF scores. ....                                 | 85  |
| Supplementary Figure 31. UCSC Genome Browser screenshot of the two PRAM transcripts that have >70% of their exons overlapped with PhyloCSF-predicted coding regions. .... | 86  |
| Supplementary Figure 32. Comparison of PRAM transcripts with ENCODE GM12878 PacBio long reads. ....                                                                       | 87  |
| Supplementary Figure 33. RAMPAGE signals of '1-Step' and '2-Step' specific human transcripts. ....                                                                        | 88  |
| Supplementary Figure 34. Epigenetic signals of '1-Step' and '2-Step' specific human transcripts. ....                                                                     | 89  |
| Supplementary Figure 35. The six PRAM mouse gene models and their genomic features. ....                                                                                  | 94  |
| Supplementary Figure 36. Primer diagrams for PRAM mouse and human transcripts. ....                                                                                       | 95  |
| Supplementary Figure 37. CUFFp.chr10.20259 and CUFFm.chr17.20196 expression levels in G1E ER-GATA1 by qRT-PCR. ....                                                       | 96  |
| Supplementary Figure 38. Expression levels of PRAM models and their neighboring genes in sorted fetal liver cells by qRT-PCR. ....                                        | 97  |
| Supplementary Figure 39. PRAM mouse transcripts overlapped with newly annotated GENCODE transcripts. ....                                                                 | 98  |
| Supplementary Figure 40. PRAM K562 transcripts and their genomic features. ....                                                                                           | 99  |
| Supplementary Figure 41. PRAM mouse and K562 transcripts and their neighboring genes. ....                                                                                | 100 |
| Supplementary Figure 42. Estimated expression levels and fragment counts for PRAM K562 transcripts. ....                                                                  | 101 |
| Supplementary Figure 43. Splice sites and input RNA-seq fragments of CUFFp.chr7.6106. ....                                                                                | 102 |

**Supplementary Note 1. Cufflinks-predicted models have false positive splice junctions.**

Cufflinks-based '1-Step' and '2-Step' methods constructed a number of false positive splice junctions (Figure 1A), which seemed to contradict with the 'noise-free' input of the benchmark data. We found that most of these false positives had 5'- and 3'- splice sites shifted by the same number of base pairs (Supplementary Table 2) and a large fraction of them shifted by only one or two base pairs (Supplementary Figure 3 and Supplementary Figure 4). This suggests a further investigation to understand why Cufflinks built splice junctions this way.



## Supplementary Note 2. Benchmark on simulated RNA-seq data containing noise.

We used RSEM's simulator to simulate RNA-seq data containing noise. RSEM's simulator can generate sequencing fragments based on pre-defined gene expression levels and on features such as noise level, fragment length distribution, read start position distribution, and sequencing error models learned from real datasets. In particular, noisy reads from RSEM simulator are randomly generated read sequences. Therefore, we used RSEM for our simulations.

Next, we describe the details of the simulations. We used the 1,256 benchmark transcripts as the full set of transcripts in the genome throughout the simulations that also included random noisy reads not originating from these transcripts. We used the quantification on the GENCODE transcripts in each of the 30 ENCODE RNA-seq datasets ([https://github.com/pliu55/PRAM\\_paper](https://github.com/pliu55/PRAM_paper)) to extract the TPMs of benchmark transcripts and re-scaled them to one million to fulfill the assumption that benchmark transcripts were the only transcripts in the genome. We then simulated two million fragments based on the re-scaled TPMs and the noise ratios learned from each of the ENCODE datasets. The rationale for the two million reads was the observed maximum of 1.9 million total number of fragments that resided within the benchmark transcripts across the ENCODE datasets. Simulated fragments were aligned to entire genome by STAR to mimic real case applications. As a result, some fragments were not only mapped to benchmark transcripts, but also to other loci in the genome. All of the two '1-Step' methods and three '2-Step' methods were used to predict transcripts. Since the input RNA-seq datasets contained 'noise', predicted transcripts that had only one exon or genomic span shorter than 200 bp were removed by PRAM's default filtering step.

A summary of the simulation results according to a number of different criteria is now included in the manuscript. Below, we discuss the overall implications of these results. Given that our simulated RNA-seq fragments did not ensure full coverage of all the target transcripts, we first compared the methods in terms of the number of targets for which they failed to predict any model. The two '1-Step' methods, 'pooling + Cufflinks' and 'pooling + StringTie', had fewer missed targets than the three '2-Step' methods (Supplementary Table 4). Supplementary Figure 7 shows an example, where both the two '1-Step' methods predicted models for the target AC073284.4 and all of the three '2-Step' methods missed this target transcript. Since our simulation contained 'noisy' RNA-seq fragments, which could potentially give rise to false positive transcript prediction, we next quantified the numbers of predicted models that did not overlap with any of the targets. 'Pooling + Cufflinks' had more such noisy models than 'Cufflinks + Cuffmerge' and 'Cufflinks + TACO', while 'pooling + StringTie' had more noisy models than 'StringTie + merging' (Supplementary Table 4). These noisy models mostly originated from multi-mapping RNA-seq fragments that also aligned to target transcripts (Supplementary Figure 8). Most of the noisy models had lower expression levels than those of non-noisy models (Supplementary Figure 9). Thus, these noisy models are likely to be well separated from the true models and should not constitute a significant problem in real applications. The comparison of missed targets and noisy models suggested that '1-Step' methods had increased prediction coverage at the expense of noisy models.

Unlike our 'noise-free' data-driven benchmark, simulated RNA-seq fragments in these simulations did not guarantee full coverage of all target transcripts. Therefore, we separated 'detected' target transcripts (i.e., those overlapping with a predicted model) from 'undetected' ones and focused on targets that had predicted models from all of the two '1-Step' and three '2-Step' methods. This allowed us to make a fair comparison for all five methods on simulated data in addition to the missed and noisy target quantifications in Supplementary Table 4. 942 targets out of the 1256 were predicted by all five methods. For each method, we calculated precision and recall of the predicted models that overlapped with this gold-standard set. Models that overlapped with multiple targets were excluded to avoid ambiguity. Except for 'Cufflinks + Cuffmerge', which had markedly lower precision, the methods had similar precision and recall for all the three features evaluated (Supplementary Figure 10).

### **Supplementary Note 3. ‘1-Step’ methods predicted a very small number of chimeric transcripts.**

We first quantified the numbers of intergenic transcripts were partially overlapping since these would be the loci to give rise to chimeric transcript predictions. Since we do not have a true set of intergenic transcripts, we used the ‘newly discovered’ GENCODE transcripts instead, because we showed in our manuscript that they have similar features to intergenic transcripts.

There are 1034 ‘newly discovered’ transcripts in total. To avoid double counting, we removed those that had genomic span as a subset of another ‘newly discovered’ transcript’s genomic span, because any transcripts that partially overlapped with them would also overlap with their ‘superset’ transcripts. Using the 963 remaining transcripts, we looked for pairs of transcripts that were partially overlapping on the same strand. Only 51 of the 963 transcripts (5%) belonged to this category (Supplementary Table 5). The small percentage of partially overlapping transcripts indicated that chimeric transcripts would be a small fraction of the intergenic transcripts predicted by ‘1-Step’ methods.

To estimate the number of chimeric transcripts in real predictions, we performed a benchmark test on the ‘newly discovered’ transcripts. To increase the biological diversity of the input RNA-seq samples, we downloaded a new set of data from ENCODE that were derived from 19 different human tissues and five different donors (Supplementary Table 6). We selected these samples with the following criteria:

- have a state as ‘released’ without any warning item;
- poly(A) paired-ended strand-specific human tissue RNA-seq from ENCODE, Roadmap, or GGR;
- have BAM files containing RNA-seq fragments mapped to hg38 for public download (i.e., not restricted through dbGAP);
- if multiple replicates existed for the same sample, the one with the highest number of uniquely mapped fragments was taken

To test prediction’s dependency on different number of input, we created four subset datasets by selecting 5, 10, 20, and 30 samples from the 40 total samples (Supplementary Table 6). To prepare the datasets, we first ran K-means clustering on gene expression profiles of the 40 samples to divide them into 5, 10, 20, or 30 groups. As an example, Supplementary Figure 11 shows a multidimensional scaling plot of the gene expression profiles with K-means clustering into 5 groups. Samples from similar anatomic sites, such as heart (the red cluster in the lower right of Supplementary Figure 11) or colon (the blue cluster in the upper left of Supplementary Figure 11) were clustered into one group. From each group, we randomly picked one sample as the representative and therefore obtained datasets containing 5, 10, 20, or 30 RNA-seq experiments. Together with a dataset including all 40 samples, we obtained five sets with different numbers of samples (5, 10, 20, 30, and 40). We used these five sets as the input for transcript prediction in the following analysis.

To estimate the number of chimeric transcripts that may arise in actual applications of ‘1-Step’ and ‘2-Step’ methods, we performed a benchmark test using the ‘newly discovered’ transcripts as the ground truth. We utilized these instead of the select single-transcript genes we used in our ‘noise-free’ benchmark because they can give rise to chimeric transcripts as discussed above. We prepared mapped RNA-seq fragments in the same way as we did in our ‘noise-free’ benchmark for comparing ‘1-Step’ and ‘2-Step’ methods with the exception of not requiring full RNA-seq fragment coverage of every ‘newly discovered’ transcript. We applied the two ‘1-Step’ methods, ‘pooling + Cufflinks’ and ‘pooling + StringTie’ on the 40 input RNA-seq datasets and summarized the number of predicted chimeric transcripts. There were at most 16 chimeric transcripts by the two ‘1-Step’ methods (Supplementary Figure 12). Not every potential chimeric transcript loci generated a chimeric transcript, most likely due to the incomplete RNA-seq fragment coverage of these loci. The fact that, at most, only 16 transcripts were chimeric among the large set of (~1000) ‘newly discovered’ transcripts

suggested again that chimeric transcripts are a negligible fraction of intergenic transcripts predicted by ‘1-Step’ methods.

We also evaluated the impact of the number of input RNA-seq datasets on the number of chimeric transcripts predicted. We considered the sets of 5, 10, 20, and 30 samples randomly selected from K-means clustering as described above. The number of predicted chimeric transcripts did not increased dramatically when using 10, 20, 30, or 40 samples (Supplementary Figure 12), suggesting that increasing the number of inputs would not lead to a large increase in the predicted chimeric transcripts.

Finally, we also asked whether ‘2-Step’ methods can resulted in chimeric transcripts. The ‘2-Step’ method, ‘StringTie + merging’, which had been shown to have superior performance than the other two ‘2-Step’ methods in our method-comparing benchmark, predicted 6 to 14 chimeric transcripts (Supplementary Figure 12). Although these numbers were slightly smaller than the ones from ‘1-Step’ methods, it nevertheless suggested that the ‘2-Step’ method was not immune from predicting chimeric transcripts.

#### **Supplementary Note 4. PRAM has competitive time and memory cost for intergenic transcript discovery.**

We evaluated PRAM's performance on the 30 RNA-seq datasets that were used to construct our benchmark. After PRAM extracted the RNA-seq alignments within intergenic regions ( $\geq 10$  kb away from any GENCODE version 24 genes or pseudo-genes), the average number of uniquely mapped fragments was reduced from 71 million to 0.43 million and the average number of multi-mapping fragments decreased from 7.7 million to 0.08 million (Supplementary Table 7). Consequently, the average size of the input BAM files shrunk from 15 GB to 0.07 GB (Supplementary Table 8). The dramatic reduction in the number of alignments to be processed allowed PRAM to finish model building in under four hours using eight 2.1 GHz AMD CPUs in parallel by the default 'pooling + Cufflinks' method (Supplementary Table 9). Furthermore, 'pooling + StringTie' on the same input took only seven minutes, which is comparable to or much faster than the '2-Step' methods (Supplementary Table 9). The marked reduction of input size and competitive computing time illustrates that PRAM streamlines the process of intergenic transcript discovery via the '1-Step' approach.

To study the trade-off between accuracy and execution time, we ran the two '1-Step' methods, 'pooling + Cufflinks' and 'pooling + StringTie' on the 5, 10, 20, 30, and 40 RNA-seq samples that described above. To increase statistical power, we removed the full coverage requirement of the target transcripts and thus expanded to target set to all of the 3,643 GENCODE (version 24)'s one-transcript genes on Chromosome 1 to 22 and X. We did a benchmark evaluation in the same way as we did in our 'noise-free' benchmark. When the number of input datasets increased, the running time for 'pooling + Cufflinks' increased dramatically, whereas the running time for 'pooling + StringTie' increased slightly (Supplementary Figure 13). The memory cost remained about the same for both '1-Step' methods when input increased from 10 to 40 samples (Supplementary Figure 13).

To evaluate prediction accuracy, we first assessed the number of target transcripts without any predicted models. As expected, when using more input samples, the coverage of target transcripts increased and resulted in fewer missed target transcripts for both '1-Step' methods (Supplementary Figure 14). 'Pooling + Cufflinks' missed fewer targets than 'pooling + StringTie' under the same number of input samples (Supplementary Figure 14). Next, we evaluated prediction accuracy for the 780 target transcripts with predicted models from both methods under all the different numbers of input samples. For prediction of exon nucleotides, recall increased as the number of input samples increased, while precision remained at a nearly perfect level for both methods (Supplementary Figure 15). For prediction of individual junction and transcript structure, both precision and recall increased as the number of input increased for both methods and 'pooling + StringTie' had markedly higher precision than 'pooling + Cufflinks' at the same numbers of samples (Supplementary Figure 15). For each method, there was a very small difference of precision and recall using 30 or 40 input samples (Supplementary Figure 15). In summary, this exposition suggests that for a high prediction coverage, i.e., detection, 'pooling + Cufflinks' with a large number of input RNA-seq samples is the best strategy. In general, we expect further scrutinization on predicted transcripts in the form of TPM filtering as we have shown in the simulation setting with added noise or integrating with other genomic samples as we have shown in our later case study in mouse. For high precision on the finer structures of the transcripts, 'pooling + StringTie' with a larger number of samples provided marked improvement, but after 10 samples, the gains were negligible. We would like to also emphasize that the setting we have considered here does not address all the cases one might encounter in practice. However, it provides reassurance that even going from 5 to 30 samples across diverse tissues, the evaluation metrics indicate gain in power.

**Supplementary Note 5. PRAM transcripts are unlikely to be eRNAs or uROFs.**

A comparison of the PRAM transcripts to the FANTOM5 ‘robust set’ of 38,554 predicted enhancers (referred to as “enhancers”) revealed that only 2.8% (1,091) of all the enhancers overlapped with 8.8% (1,246) of our master set of transcripts. These 1,091 enhancers had markedly shorter lengths (median = 316 bp) than those of the 1,246 transcript models (median = 7,977 bp) (Supplementary Figure 21). This further confirms that our master set of transcript models are unlikely to harbor eRNAs. The genomic distance constraint to the annotated genes (10kb away) we applied during PRAM prediction excluded the possibility that PRAM were upstream open read frames (uORFs).

### **Supplementary Note 6. Protein-coding potential of PRAM transcripts.**

We assessed the protein-coding potential of PRAM transcripts by BLAST and PhyloCSF. 31% of PRAM transcripts aligned to at least one protein sequence by BLAST against non-redundant mammalian protein sequences (Supplementary Table 16). PRAM transcripts and 'newly discovered' GENCODE transcripts shared a similar distribution of numbers of matched proteins (Supplementary Figure 26). In particular, 41 repeat-free PRAM transcripts matched to more than 100 proteins via BLAST (Supplementary Figure 26). Since only 62 of the 1,034 (6%) 'newly discovered' transcripts are protein-coding and a large fraction of BLAST-matched proteins on the 41 PRAM transcripts are uncertain (Supplementary Figure 27), we also evaluated their ORFs and PhyloCSF scores. Predicted ORF lengths of the 41 PRAM transcripts are similar to those of 'newly discovered' transcripts, but shorter than those of 'long-standing' transcripts (Supplementary Figure 28). Most of these predicted ORFs have negative PhyloCSF scores, suggesting that they are unlikely to be protein-coding (Supplementary Figure 29). Only one of the transcripts, *plcf\_chr2\_minus.9034.2*, has a predicted ORF with a positive PhyloCSF score (Supplementary Figure 29 and Supplementary Figure 30). This transcript is also the only one with an ORF that partially overlaps with a PhyloCSF-predicted coding region on the same strand and frame (Supplementary Figure 30), suggesting some protein-coding potential. We noted that, over this locus, PhyloCSF's statistical power had a maximum around 0.4, which is much lower than the maximum possible power of 1.0 (Supplementary Figure 30). Therefore, interpreting this transcript's protein-coding potential warrants some caution.

Another transcript at the same locus, *plcf\_chr2\_minus.9034.1*, is also one of the 41 PRAM transcripts. This transcript has exons overlapping with PhyloCSF-predicted coding regions on the same strand regardless of frame (Supplementary Figure 30). However, due to an unmatched frame in the middle region of its ORF (Frame 3 vs. Frame 2) and lack of an overlap of its 3' region with predicted coding regions on Frame 3, its PhyloCSF score is negative, suggesting low protein-coding potential.

Most of the BLAST-matched proteins for PRAM transcript *plcf\_chr2\_minus.9034.1* and *plcf\_chr2\_minus.9034.2* are hypothetical or predicted proteins (Supplementary Table 17 and Supplementary Table 18), which we classified as 'uncertain proteins' earlier. These two lists of proteins indicate again that protein-coding potential of these two transcripts' should be interpreted cautiously.

Since the number of BLAST-matched proteins may not be sufficient to support a transcript's protein-coding potential as we observed from the 41 PRAM transcripts above, we decided to expand our PhyloCSF analysis to all PRAM transcripts. A large number of PRAM transcripts do not have any overlap with PhyloCSF-predicted coding regions (Supplementary Table 19), suggesting that they are unlikely to be protein-coding. However, there are two transcripts that have relatively large overlap with PhyloCSF-predicted coding regions regardless of frame (Supplementary Table 19). These two transcripts are highlighted in Supplementary Figure 31.

### **Supplementary Note 7. Transcripts predicted uniquely by ‘1-Step’ methods were supported by RAMPAGE and histone mark ChIP-seq data.**

As a final assessment of PRAM transcripts, we asked whether these ‘1-Step’-predicted transcripts were missed by ‘2-Step’ methods and yet had supporting promoter activities and epigenetic signals. Specifically, we compared transcripts built by the ‘1-Step’ method (‘pooling + Cufflinks’) with those from ‘2-Step’ methods (‘Cufflinks + Cuffmerge’ and ‘Cufflinks + TACO’) and exclusively focused on those that were predicted by only one method (Supplementary Table 20). We followed the above strategy of examining RAMPAGE and histone modification signals as a function of gene expression. There was only one model solely predicted by the ‘1-Step’ method that had  $\text{TPM} \geq 1$  (Supplementary Table 20), whereas the ‘2-Step’ methods had one or three such unique models depending on the category of mappability-filtering. The ‘1-Step’ prediction had the highest promoter activity of all the uniquely predicted models (Supplementary Figure 33), suggesting that this model was most likely a true transcript. Of transcripts with  $\text{TPM} \in [0.1, 1)$ , there were thirteen and seventeen models predicted uniquely by the ‘1-Step’ method in GM12878 and K562, respectively (Supplementary Table 20), compared to at most five models predicted uniquely by the ‘2-Step’ methods. At least one of the ‘1-Step’ predictions had higher promoter activity compared to ‘2-Step’ models with similar expression levels (Supplementary Figure 33). Histone modification signals of all these models had distributions with higher medians than those from models with  $\text{TPM} < 0.1$  (Supplementary Figure 34). Both the promoter activities and epigenetic signals suggested that ‘1-Step’ method identified well-supported transcripts that were not predicted by ‘2-Step’ methods, demonstrating again that the ‘1-Step’ approach outperforms ‘2-Step’ approaches.

### **Supplementary Note 8. '2-Step' methods and Cufflinks missed validated '1-Step' mouse models.**

Four gene models (CUFFm.chr12.33668, CUFFm.chr17.20196, CUFFp.chr10.20259, and CUFFp.chr12.15498) built by '1-Step' method 'pooling + Cufflinks' had been detected by semi-qRT-PCR in G1E-ER-GATA1 cells. We asked whether '2-Step' methods or transcript reconstruction based on individual RNA-seq dataset can also predict these four 'hit' gene models. We applied 'Cufflinks + Cuffmerge' and 'Cufflinks + TACO' on the same 32 input RNA-seq datasets as well as applying Cufflinks on each of the input RNA-seq datasets (Supplementary Table 21). Since our gene models were built by 'pooling + Cufflinks', we only used Cufflinks and did not include StringTie here as to make a fair comparison. Although both of the two '2-Step' methods and 25 out of 32 Cufflinks runs built models that overlapped with our four hits, only those from 'Cufflinks + Cuffmerge' and 8 out of 32 Cufflinks runs remained after selecting by differential expression (Supplementary Table 27). Following the same selection steps as we did for our hits, none of the '2-Step' methods or Cufflinks produced gene models overlapped with CUFFm.chr17.20196 or CUFFp.chr12.15498. Only 'Cufflinks + Cuffmerge' produced a gene model overlapping with CUFFp.chr10.20259 (Supplementary Table 28). This comparison further reinforced the fact that '1-Step' approach outperformed '2-Step' approach.



**Supplementary Note 9. Gene model CUFFp.chr7.6106 was not expressed in K562.**

CUFFp.chr7.6106 had both TPM and expected fragment counts as zero in all RNA-seq datasets, indicating that it was not expressed at all (Supplementary Figure 42 A and B). Further investigation showed that CUFFp.chr7.6106 was built on an RNA-seq fragment from the K562 dataset ENCSR109IQO (replicate 2) with its 5'-splice site not compatible with this fragment (Supplementary Figure 43). This is attributable to Cufflinks's shift of splice sites as observed in our 'noise-free' benchmark (Supplementary Note 1; Supplementary Figure 3 and Supplementary Figure 4). As a result, no K562 RNA-seq fragment was compatible with CUFFp.chr7.6106 and thus its expected count was zero in all datasets.

**Supplementary Table 1. ENCODE human RNA-seq datasets for benchmark test.** Accession IDs and metadata were obtained from ENCODE website: <https://www.encodeproject.org>. BAM files were downloaded directly from ENCODE to build the benchmark. This dataset contains all of the strand-specific paired-end poly(A) mRNA-seq alignments for human untreated immortalized cell lines released by ENCODE as of February, 2017. RNA-seq datasets from subcellular fractions, including membrane, nucleolus, nucleus, cytosol, chromatin, or nucleoplasm, were excluded. All of the alignments were mapped to human genome hg38 annotated by GENCODE version 24.

| Experiment  | Cell    | Biological replicate index | BAM         | Mate1 FASTQ | Mate2 FASTQ |
|-------------|---------|----------------------------|-------------|-------------|-------------|
| ENCSR000AED | GM12878 | 1                          | ENCFF802TLC | ENCFF001REK | ENCFF001REJ |
| ENCSR000AED | GM12878 | 2                          | ENCFF428VBU | ENCFF001REI | ENCFF001REH |
| ENCSR000AEF | GM12878 | 1                          | ENCFF547YFO | ENCFF001RDG | ENCFF001RCY |
| ENCSR000AEF | GM12878 | 2                          | ENCFF782IVX | ENCFF001RDF | ENCFF001RCX |
| ENCSR000AEM | K562    | 1                          | ENCFF912SZP | ENCFF001RED | ENCFF001RDZ |
| ENCSR000AEM | K562    | 2                          | ENCFF207ZSA | ENCFF001REG | ENCFF001REF |
| ENCSR000AEO | K562    | 1                          | ENCFF846WOV | ENCFF001RDE | ENCFF001RCW |
| ENCSR000AEO | K562    | 2                          | ENCFF588YLF | ENCFF001RDD | ENCFF001RCV |
| ENCSR000CON | A549    | 1                          | ENCFF125RAL | ENCFF000EJJ | ENCFF000EJV |
| ENCSR000CON | A549    | 2                          | ENCFF739OVZ | ENCFF000EJW | ENCFF000EKB |
| ENCSR000COQ | GM12878 | 1                          | ENCFF709IUX | ENCFF000EWJ | ENCFF000EWX |
| ENCSR000COQ | GM12878 | 2                          | ENCFF244ZQA | ENCFF000EWW | ENCFF000EXE |
| ENCSR000CPE | HepG2   | 1                          | ENCFF315VHI | ENCFF000FVT | ENCFF000FVU |
| ENCSR000CPE | HepG2   | 2                          | ENCFF834ITU | ENCFF000FVI | ENCFF000FVV |
| ENCSR000CPH | K562    | 1                          | ENCFF048ODN | ENCFF000HFF | ENCFF000HFG |
| ENCSR000CPH | K562    | 2                          | ENCFF381BQZ | ENCFF000HFH | ENCFF000HFY |
| ENCSR000CPR | HeLa-S3 | 1                          | ENCFF343WEZ | ENCFF000FOM | ENCFF000FOV |
| ENCSR000CPR | HeLa-S3 | 2                          | ENCFF444SCT | ENCFF000FOK | ENCFF000FOY |
| ENCSR000CPT | MCF-7   | 1                          | ENCFF367VEP | ENCFF000HQR | ENCFF000HQP |
| ENCSR000CPT | MCF-7   | 2                          | ENCFF983FHE | ENCFF000HQQ | ENCFF000HRH |
| ENCSR000CTT | SK-N-SH | 1                          | ENCFF263OLY | ENCFF000IMA | ENCFF000IMR |
| ENCSR000CTT | SK-N-SH | 2                          | ENCFF978ACT | ENCFF000IMC | ENCFF000IMS |
| ENCSR310FIS | MCF-7   | 1                          | ENCFF904OHO | ENCFF002DKR | ENCFF002DKU |
| ENCSR310FIS | MCF-7   | 2                          | ENCFF838JGD | ENCFF002DKX | ENCFF002DKY |
| ENCSR545DKY | K562    | 1                          | ENCFF044SJL | ENCFF059IUV | ENCFF104ZSG |
| ENCSR545DKY | K562    | 2                          | ENCFF728JKQ | ENCFF628GUZ | ENCFF695XOC |
| ENCSR561FEE | HepG2   | 1                          | ENCFF306YQS | ENCFF946VBP | ENCFF982FAM |
| ENCSR561FEE | HepG2   | 2                          | ENCFF521KYZ | ENCFF787PPA | ENCFF564BSM |
| ENCSR985KAT | HepG2   | 1                          | ENCFF800YJR | ENCFF002DKZ | ENCFF002DLC |
| ENCSR985KAT | HepG2   | 2                          | ENCFF782TAX | ENCFF002DLE | ENCFF002DLG |

**Supplementary Table 2. Number of false positive splice junctions by ‘1-Step’ and ‘2-Step’ methods.**

False positives were only from Cufflinks-based methods and most of them had the 5'- and 3'-splice sites shifted by the same number of base pairs.

| Method                | Number of false positive splice junctions |                                                                 |
|-----------------------|-------------------------------------------|-----------------------------------------------------------------|
|                       | Total                                     | 5'- and 3'-splice site shifted by the same number of base pairs |
| pooling + Cufflinks   | 192                                       | 192                                                             |
| Cufflinks + Cuffmerge | 549                                       | 544                                                             |
| Cufflinks + TACO      | 251                                       | 249                                                             |
| pooling + StringTie   | 0                                         | 0                                                               |
| StringTie + merging   | 0                                         | 0                                                               |

**Supplementary Table 3. Number of transcripts missed by ‘1-Step’ and ‘2-Step’ methods in benchmark test.** Two ‘1-Step’ methods (‘pooling + Cufflinks’ and ‘pooling + StringTie’) and three ‘2-Step’ methods (‘Cufflinks + Cuffmerge’, ‘Cufflinks + TACO’, and ‘StringTie + merging’) are compared here. ‘Predicted’ refers to cases with recall = 1 and precision = 1, and ‘missed’ to cases with recall = 0. We compared the number of transcripts that had their structures predicted correctly (i.e., transcripts with recall = 1 and precision = 1) by one type of meta-assembly method, but missed (recall = 0) by the other. There were 918 transcripts constructed by both of the ‘1-Step’ methods. Among these, eighteen were missed by all three ‘2-Step’ methods and 28 were missed by two ‘2-Step’ methods. In comparison, there were only 461 transcripts constructed by all three ‘2-Step’ methods, none of which were missed by the ‘1-Step’ methods. Similarly, of the 433 transcripts that were predicted by two ‘2-Step’ methods, only six were missed by both of the ‘1-Step’ methods.

|                                                          |   | Number of ‘2-Step’ methods that missed the transcript |     |    |       |       |
|----------------------------------------------------------|---|-------------------------------------------------------|-----|----|-------|-------|
|                                                          |   | 0                                                     | 1   | 2  | 3     | Total |
| Number of ‘1-Step’ methods that predicted the transcript | 0 | 1                                                     | 20  | 13 | 27    | 61    |
|                                                          | 1 | 105                                                   | 82  | 70 | 20    | 277   |
|                                                          | 2 | 635                                                   | 237 | 28 | 18    | 918   |
|                                                          |   |                                                       |     |    |       |       |
|                                                          |   | Number of ‘1-Step’ methods that missed the transcript |     |    |       |       |
|                                                          |   | 0                                                     | 1   | 2  | Total |       |
| Number of ‘2-Step’ methods that predicted the transcript | 0 | 34                                                    | 33  | 30 | 97    |       |
|                                                          | 1 | 181                                                   | 75  | 9  | 265   |       |
|                                                          | 2 | 364                                                   | 63  | 6  | 433   |       |
|                                                          | 3 | 446                                                   | 15  | 0  | 461   |       |

**Supplementary Table 4. Number of atypical target transcripts and predicted models.** ‘Missed targets’ refers to target transcripts without any predicted models overlapping with their genomic span on the same strand. ‘Noisy models’ are predicted models with genomic span do not overlap with any target transcripts on the same strand.

| <b>method</b>         | <b>number of missed targets</b> | <b>number of noisy models</b> |
|-----------------------|---------------------------------|-------------------------------|
| pooling + Cufflinks   | 30                              | 382                           |
| pooling + StringTie   | 37                              | 260                           |
| Cufflinks + Cuffmerge | 254                             | 354                           |
| Cufflinks + TACO      | 59                              | 159                           |
| StringTie + merging   | 41                              | 177                           |

**Supplementary Table 5. Number of ‘newly discovered’ transcripts with potential to give rise of predicted chimeric transcripts.**

| <b>‘newly discovered’ transcripts</b>                              | <b>number of transcripts</b> |
|--------------------------------------------------------------------|------------------------------|
| total                                                              | 1034                         |
| after removing transcripts that were a subset of other transcripts | 963                          |
| transcripts that partially overlapped with other transcripts       | 51                           |

**Supplementary Table 6. ENCODE human tissue RNA-seq datasets.** Datasets randomly selected as representatives for each K-means clustering were denoted as ‘Y’ for 5, 10, 20, or 30 clusters. They were used as the input RNA-seq datasets for later analysis.

| tissue                | donor                   | RNA-seq ID  | BAM ID      | N=5 | N=10 | N=20 | N=30 |
|-----------------------|-------------------------|-------------|-------------|-----|------|------|------|
| adipose tissue        | female adult (30 years) | ENCSR686JJB | ENCFF717MIN |     |      | Y    | Y    |
| adipose tissue        | male adult (34 years)   | ENCSR741QEH | ENCFF491UPQ |     |      |      | Y    |
| adipose tissue        | male child (3 years)    | ENCSR718CDN | ENCFF668YHY |     |      |      | Y    |
| adrenal gland         | female adult (30 years) | ENCSR146ZKR | ENCFF181WWD |     |      |      |      |
| adrenal gland         | male adult (21 year)    | ENCSR680AAZ | ENCFF917FLU |     |      |      | Y    |
| adrenal gland         | male adult (34 years)   | ENCSR598KJX | ENCFF225BUX |     |      | Y    | Y    |
| aorta                 | female adult (30 years) | ENCSR995BHD | ENCFF864QLZ |     |      | Y    | Y    |
| aorta                 | male adult (34 years)   | ENCSR763NOO | ENCFF081DYZ |     |      | Y    | Y    |
| esophagus             | female adult (30 years) | ENCSR993QGR | ENCFF441FVJ |     |      |      |      |
| esophagus             | male adult (34 years)   | ENCSR102TQN | ENCFF251YUZ |     | Y    | Y    | Y    |
| heart                 | female adult (30 years) | ENCSR635GTY | ENCFF710AVC | Y   |      | Y    | Y    |
| heart left ventricle  | male adult (34 years)   | ENCSR769LNJ | ENCFF466PKR |     |      |      |      |
| heart left ventricle  | male child (3 years)    | ENCSR693CSQ | ENCFF127SLH |     |      |      |      |
| heart right ventricle | male adult (34 years)   | ENCSR433XCV | ENCFF684RZI |     | Y    | Y    | Y    |
| heart right ventricle | male child (3 years)    | ENCSR439SPU | ENCFF884HIK |     |      | Y    | Y    |
| liver                 | male child (3 years)    | ENCSR714KDG | ENCFF131MIC | Y   | Y    | Y    | Y    |
| lung                  | female adult (30 years) | ENCSR917YHC | ENCFF024HAR |     |      |      | Y    |
| lung                  | male child (3 years)    | ENCSR278UYN | ENCFF841DQD |     |      | Y    | Y    |
| ovary                 | female adult (30 years) | ENCSR725TPW | ENCFF325FVQ | Y   | Y    |      | Y    |
| ovary                 | female adult (47 years) | ENCSR046XHI | ENCFF448GEE |     |      | Y    | Y    |
| pancreas              | female adult (30 years) | ENCSR571BML | ENCFF085TWC |     | Y    | Y    |      |
| pancreas              | male adult (34 years)   | ENCSR629VMZ | ENCFF199EFU |     |      |      | Y    |
| psoas muscle          | female adult (30 years) | ENCSR502OTI | ENCFF677DKS |     |      |      | Y    |
| psoas muscle          | male adult (34 years)   | ENCSR843HXR | ENCFF738TTD |     | Y    | Y    | Y    |
| psoas muscle          | male child (3 years)    | ENCSR817TLH | ENCFF344BDW |     |      |      | Y    |

|                      |                         |             |             |   |   |   |
|----------------------|-------------------------|-------------|-------------|---|---|---|
| right cardiac atrium | male adult (34 years)   | ENCSR675YAS | ENCFF704QQH |   |   | Y |
| sigmoid colon        | female adult (30 years) | ENCSR825GWD | ENCFF588TQX |   | Y | Y |
| sigmoid colon        | male adult (34 years)   | ENCSR999ZCI | ENCFF050JVY | Y |   | Y |
| sigmoid colon        | male child (3 years)    | ENCSR396GIH | ENCFF323GDO |   | Y |   |
| small intestine      | female adult (30 years) | ENCSR039ICU | ENCFF584GAJ |   | Y |   |
| small intestine      | male adult (34 years)   | ENCSR719HRO | ENCFF894PUN |   | Y | Y |
| small intestine      | male child (3 years)    | ENCSR618IQY | ENCFF484FAQ |   | Y | Y |
| spleen               | female adult (30 years) | ENCSR510PSL | ENCFF717MVQ |   |   |   |
| spleen               | male adult (34 years)   | ENCSR910QOX | ENCFF918SPI |   | Y | Y |
| spleen               | male child (3 years)    | ENCSR663IOE | ENCFF618CGM |   |   |   |
| stomach              | female adult (30 years) | ENCSR980UEY | ENCFF056CIU |   | Y |   |
| stomach              | male adult (34 years)   | ENCSR721HDG | ENCFF268XDH |   | Y | Y |
| stomach              | male child (3 years)    | ENCSR922VBO | ENCFF525ANA | Y |   | Y |
| thymus               | male child (3 years)    | ENCSR775KCE | ENCFF401QEF |   | Y | Y |
| urinary bladder      | male child (3 years)    | ENCSR448DCX | ENCFF934KPK |   | Y | Y |



**Supplementary Table 7. Number of RNA-seq alignments before and after filtering for intergenic regions.** BAM accession IDs correspond to the ones in Supplementary Table 1. Uni- and multi-mapped fragments were defined by whether their BAM NH tags were equal or higher to 1.

| RNA-seq BAM<br>accession ID | Number of RNA-seq fragments (million) |            |               |            |
|-----------------------------|---------------------------------------|------------|---------------|------------|
|                             | Uniquely mapping                      |            | Multi-mapping |            |
|                             | ENCODE                                | Intergenic | ENCODE        | Intergenic |
| ENCFF044SJL                 | 37.38                                 | 0.37       | 4.50          | 0.10       |
| ENCFF048ODN                 | 84.81                                 | 0.82       | 10.10         | 0.14       |
| ENCFF125RAL                 | 73.97                                 | 0.25       | 10.21         | 0.08       |
| ENCFF207ZSA                 | 88.73                                 | 0.63       | 16.02         | 0.10       |
| ENCFF244ZQA                 | 103.28                                | 1.11       | 10.89         | 0.13       |
| ENCFF263OLY                 | 116.56                                | 0.20       | 9.26          | 0.04       |
| ENCFF306YQS                 | 16.46                                 | 0.04       | 1.50          | 0.02       |
| ENCFF315VHI                 | 98.30                                 | 0.47       | 8.42          | 0.10       |
| ENCFF343WEZ                 | 96.53                                 | 0.77       | 7.45          | 0.11       |
| ENCFF367VEP                 | 95.76                                 | 0.76       | 11.77         | 0.20       |
| ENCFF381BQZ                 | 87.32                                 | 0.85       | 10.96         | 0.15       |
| ENCFF428VBU                 | 76.24                                 | 0.32       | 10.65         | 0.05       |
| ENCFF444SCT                 | 94.03                                 | 0.60       | 8.08          | 0.08       |
| ENCFF521KYZ                 | 19.45                                 | 0.04       | 1.77          | 0.02       |
| ENCFF547YFO                 | 35.02                                 | 0.17       | 2.62          | 0.03       |
| ENCFF588YLF                 | 53.76                                 | 0.37       | 4.22          | 0.05       |
| ENCFF709IUX                 | 88.74                                 | 1.35       | 9.03          | 0.16       |
| ENCFF728JKQ                 | 38.02                                 | 0.35       | 4.71          | 0.10       |
| ENCFF739OVZ                 | 96.35                                 | 0.31       | 9.28          | 0.09       |
| ENCFF782IVX                 | 103.55                                | 0.43       | 8.02          | 0.07       |
| ENCFF782TAX                 | 56.15                                 | 0.12       | 3.67          | 0.03       |
| ENCFF800YJR                 | 12.97                                 | 0.02       | 0.95          | 0.01       |
| ENCFF802TLC                 | 75.75                                 | 0.30       | 14.73         | 0.05       |
| ENCFF834ITU                 | 97.18                                 | 0.42       | 8.21          | 0.09       |
| ENCFF838JGD                 | 47.79                                 | 0.22       | 4.12          | 0.04       |
| ENCFF846WOV                 | 39.14                                 | 0.23       | 3.14          | 0.03       |
| ENCFF904OHO                 | 47.93                                 | 0.17       | 3.47          | 0.03       |
| ENCFF912SZP                 | 69.56                                 | 0.44       | 14.49         | 0.07       |
| ENCFF978ACT                 | 82.19                                 | 0.19       | 7.14          | 0.04       |
| ENCFF983FHE                 | 99.67                                 | 0.67       | 12.10         | 0.16       |

**Supplementary Table 8. RNA-seq BAM file sizes before and after filtering fragments for intergenic regions.** BAM accession IDs corresponds to the ones in Supplementary Table 1.

| RNA-seq BAM<br>accession ID | BAM file size (GB) |            |
|-----------------------------|--------------------|------------|
|                             | ENCODE             | Intergenic |
| ENCFF044SJL                 | 4.324              | 0.044      |
| ENCFF048ODN                 | 18.469             | 0.140      |
| ENCFF125RAL                 | 17.758             | 0.055      |
| ENCFF207ZSA                 | 25.198             | 0.101      |
| ENCFF244ZQA                 | 20.418             | 0.174      |
| ENCFF263OLY                 | 20.138             | 0.037      |
| ENCFF306YQS                 | 1.707              | 0.005      |
| ENCFF315VHI                 | 17.777             | 0.077      |
| ENCFF343WEZ                 | 18.084             | 0.123      |
| ENCFF367VEP                 | 22.498             | 0.153      |
| ENCFF381BQZ                 | 19.791             | 0.149      |
| ENCFF428VBU                 | 18.016             | 0.050      |
| ENCFF444SCT                 | 18.066             | 0.095      |
| ENCFF521KYZ                 | 2.008              | 0.006      |
| ENCFF547YFO                 | 9.593              | 0.033      |
| ENCFF588YLF                 | 12.434             | 0.075      |
| ENCFF709IUX                 | 18.162             | 0.211      |
| ENCFF728JKQ                 | 4.559              | 0.043      |
| ENCFF739OVZ                 | 17.526             | 0.059      |
| ENCFF782IVX                 | 24.285             | 0.088      |
| ENCFF782TAX                 | 12.220             | 0.030      |
| ENCFF800YJR                 | 3.083              | 0.006      |
| ENCFF802TLC                 | 22.013             | 0.049      |
| ENCFF834ITU                 | 17.227             | 0.070      |
| ENCFF838JGD                 | 11.608             | 0.050      |
| ENCFF846WOV                 | 9.675              | 0.047      |
| ENCFF904OHO                 | 10.775             | 0.038      |
| ENCFF912SZP                 | 21.608             | 0.070      |
| ENCFF978ACT                 | 15.930             | 0.038      |
| ENCFF983FHE                 | 21.377             | 0.117      |

**Supplementary Table 9. Computing time and memory usage for ‘1-Step’ and ‘2-Step’ methods.** Each method was ran on 2.1 GHz AMD CPUs using eight threads.

| <b>Method</b>         | <b>Time cost (minute)</b> | <b>Memory usage (MB)</b> |
|-----------------------|---------------------------|--------------------------|
| pooling + Cufflinks   | 219                       | 594                      |
| pooling + StringTie   | 7                         | 151                      |
| Cufflinks + Cuffmerge | 150                       | 155                      |
| Cufflinks + TACO      | 145                       | 162                      |
| StringTie + merging   | 5                         | 156                      |

**Supplementary Table 10. TPMs of two ‘eliminated’ PRAM transcripts in the 30 ENCODE RNA-seq datasets.** They got eliminated because they have TPM = 0 in at least one RNA-seq replicate from each of the seven cell lines.

| cell line | replicate<br>index | BAM ID      | plcf_chr1_minus.82.1 | plcf_chr9_plus.10254.3 |
|-----------|--------------------|-------------|----------------------|------------------------|
| A549      | 1                  | ENCFF125RAL | 0.00                 | 0.00                   |
| A549      | 2                  | ENCFF739OVZ | 0.00                 | 0.00                   |
| GM12878   | 1                  | ENCFF802TLC | 0.38                 | 0.00                   |
| GM12878   | 2                  | ENCFF428VBU | 0.12                 | 0.00                   |
| GM12878   | 3                  | ENCFF547YFO | 0.11                 | 0.00                   |
| GM12878   | 4                  | ENCFF782IVX | 0.22                 | 0.00                   |
| GM12878   | 5                  | ENCFF709IUX | 0.01                 | 0.00                   |
| GM12878   | 6                  | ENCFF244ZQA | 0.00                 | 0.00                   |
| HeLa-S3   | 1                  | ENCFF343WEZ | 0.00                 | 0.00                   |
| HeLa-S3   | 2                  | ENCFF444SCT | 0.00                 | 0.00                   |
| HepG2     | 1                  | ENCFF315VHI | 0.00                 | 0.00                   |
| HepG2     | 2                  | ENCFF834ITU | 0.01                 | 0.00                   |
| HepG2     | 3                  | ENCFF306YQS | 0.00                 | 0.00                   |
| HepG2     | 4                  | ENCFF521KYZ | 0.00                 | 0.00                   |
| HepG2     | 5                  | ENCFF800YJR | 0.00                 | 0.00                   |
| HepG2     | 6                  | ENCFF782TAX | 0.00                 | 0.00                   |
| K562      | 1                  | ENCFF912SZP | 0.00                 | 0.00                   |
| K562      | 2                  | ENCFF207ZSA | 0.00                 | 1.12                   |
| K562      | 3                  | ENCFF846WOV | 0.00                 | 0.77                   |
| K562      | 4                  | ENCFF588YLF | 0.00                 | 1.70                   |
| K562      | 5                  | ENCFF048ODN | 0.00                 | 0.00                   |
| K562      | 6                  | ENCFF381BQZ | 0.00                 | 0.00                   |
| K562      | 7                  | ENCFF044SJL | 0.00                 | 1.20                   |
| K562      | 8                  | ENCFF728JKQ | 0.00                 | 1.17                   |
| MCF-7     | 1                  | ENCFF367VEP | 0.00                 | 0.00                   |
| MCF-7     | 2                  | ENCFF983FHE | 0.00                 | 0.00                   |
| MCF-7     | 3                  | ENCFF904OHO | 0.00                 | 0.00                   |
| MCF-7     | 4                  | ENCFF838JGD | 0.00                 | 0.00                   |
| SK-N-SH   | 1                  | ENCFF263OLY | 0.00                 | 0.00                   |
| SK-N-SH   | 2                  | ENCFF978ACT | 0.00                 | 0.00                   |

**Supplementary Table 11. Number of PRAM transcripts before and after elimination.** Transcripts that had inconsistent expression states and got eliminated were labelled as 'TPM=0'. For GENCODE transcripts, we first removed short ones that had a single exon or genomic span shorter than 200 bp. These short transcripts were labeled as 'short'. None of PRAM transcripts fits into this short criteria.

| <b>source</b>             | <b>total</b> | <b>short</b> | <b>TPM=0</b> | <b>kept</b> |
|---------------------------|--------------|--------------|--------------|-------------|
| GENCODE: newly discovered | 1,034        | 748          | 178          | 108         |
| GENCODE: long-standing    | 197,167      | 26,262       | 61,738       | 109,167     |
| PRAM                      | 14,226       | 0            | 8,837        | 5,389       |

**Supplementary Table 12. Number of GENCODE and PRAM transcripts by TPM range.** Transcript models were predicted based on the 30 human RNA-seq datasets in Supplementary Table 1.

| category                  | total   | TPM range     | GM12878       |                                           |                                              | K562          |                                           |                                              |
|---------------------------|---------|---------------|---------------|-------------------------------------------|----------------------------------------------|---------------|-------------------------------------------|----------------------------------------------|
|                           |         |               | by TPM range* | promoter mappability $\geq 0.8^{\dagger}$ | transcript mappability $\geq 0.8^{\ddagger}$ | by TPM range* | promoter mappability $\geq 0.8^{\dagger}$ | transcript mappability $\geq 0.8^{\ddagger}$ |
| GENCODE: long-standing    | 197,167 | < 0.1         | 88,300        | 76,132                                    | 74,685                                       | 84,569        | 73,472                                    | 72,012                                       |
|                           |         | [0.1, 1)      | 2,062         | 1,882                                     | 1,872                                        | 1,973         | 1,796                                     | 1,792                                        |
|                           |         | $\geq 1$      | 19,878        | 18,767                                    | 18,415                                       | 22,081        | 20,675                                    | 20,240                                       |
|                           |         | indeterminate | 86,927        | 80,164                                    | 78,786                                       | 88,544        | 81,002                                    | 79,714                                       |
| GENCODE: newly discovered | 1,034   | < 0.1         | 795           | 531                                       | 491                                          | 751           | 517                                       | 479                                          |
|                           |         | [0.1, 1)      | 17            | 12                                        | 12                                           | 12            | 8                                         | 8                                            |
|                           |         | $\geq 1$      | 17            | 6                                         | 6                                            | 31            | 6                                         | 7                                            |
|                           |         | indeterminate | 205           | 118                                       | 122                                          | 240           | 136                                       | 137                                          |
| pooling + Cufflinks       | 14,226  | < 0.1         | 9,873         | 7,085                                     | 7,758                                        | 10,526        | 8,129                                     | 8,669                                        |
|                           |         | [0.1, 1)      | 135           | 88                                        | 92                                           | 158           | 106                                       | 118                                          |
|                           |         | $\geq 1$      | 30            | 20                                        | 23                                           | 48            | 27                                        | 34                                           |
|                           |         | indeterminate | 4,188         | 3,157                                     | 3,382                                        | 3,494         | 2,088                                     | 2,434                                        |

\* Transcripts and models were stratified by their expression levels in the six GM12878 and eight K562 RNA-seq datasets. Transcripts or models that were classified into TPM < 0.1,  $0.1 \leq \text{TPM} < 1$ , or TPM  $\geq 1$  were required to have all of their TPMs for the corresponding cell line within this range. Otherwise, they were classified as 'indeterminate'.

<sup>†</sup> A transcript or model's promoter mappability was based on the 500 bp region flanking its transcription start site, where RAMPAGE signal was calculated.

<sup>‡</sup> A transcript or model's mappability on the region including all of its exons and introns, where histone modification ChIP-seq signal was calculated.

**Supplementary Table 13. ENCODE RAMPAGE bigWig files.** Accession IDs and metadata were from <https://www.encodeproject.org>.

| Cell    | Accession ID | Biological replicate index | File type                           |
|---------|--------------|----------------------------|-------------------------------------|
| GM12878 | ENCFF039WHT  | 1                          | plus strand signal of unique reads  |
|         | ENCFF143FSY  | 1                          | minus strand signal of unique reads |
|         | ENCFF707RLJ  | 2                          | plus strand signal of unique reads  |
|         | ENCFF354OFJ  | 2                          | minus strand signal of unique reads |
| K562    | ENCFF783EAC  | 1                          | plus strand signal of unique reads  |
|         | ENCFF518WII  | 1                          | minus strand signal of unique reads |
|         | ENCFF663DTD  | 2                          | plus strand signal of unique reads  |
|         | ENCFF809GTW  | 2                          | minus strand signal of unique reads |

**Supplementary Table 14. ENCODE histone modification ChIP-seq datasets.** Accession IDs and metadata were from <https://www.encodeproject.org>.

| <b>BAM accession ID</b> | <b>Cell</b> | <b>Histone mark</b> | <b>Biological replicate index</b> |
|-------------------------|-------------|---------------------|-----------------------------------|
| ENCFF958QVX             | GM12878     | H3K36me3            | 1                                 |
| ENCFF460TXJ             | GM12878     | H3K36me3            | 2                                 |
| ENCFF676NDU             | GM12878     | H3K79me2            | 1                                 |
| ENCFF231YZJ             | GM12878     | H3K79me2            | 2                                 |
| ENCFF639PLN             | K562        | H3K36me3            | 1                                 |
| ENCFF673KBG             | K562        | H3K36me3            | 2                                 |
| ENCFF947DVY             | K562        | H3K79me2            | 1                                 |
| ENCFF408YHI             | K562        | H3K79me2            | 2                                 |



**Supplementary Table 15. Number of conserved GENCODE and PRAM transcripts.** GENCODE (version 24) and PRAM transcripts were mapped from human genome (hg38) to mouse genome (mm10) using the liftOver function from Bioconductor package rtracklayer. Human GENCODE transcripts were divided into 'long-standing' and 'newly discovered' by whether they overlapped with transcripts from the oldest available GENCODE (version 20) annotation for hg38. A transcript was considered as 'conserved' if its genomic span mapped to the same chromosome on the same strand in mouse. A 'conserved' transcript was further examined to see whether it overlapped with any mouse GENCODE (vM19) transcripts.

| transcript type                              | human GENCODE   |                  | PRAM          |
|----------------------------------------------|-----------------|------------------|---------------|
|                                              | long-standing   | newly discovered |               |
| total                                        | 197,167         | 1,034            | 14,226        |
| conserved                                    | 143,013 (72.5%) | 555 (53.7%)      | 9,164 (64.4%) |
| conserved and overlapping with mouse GENCODE | 127,137 (64.5%) | 173 (16.7%)      | 1,170 (8.2%)  |

**Supplementary Table 16. Number of BLAST-matched proteins for PRAM transcripts.** All the 14,226 master set transcripts were aligned to the mammalian protein sequences (taxonomy ID: 40674) using BLAST against the non-redundant protein sequences databases (downloaded on Dec. 14<sup>th</sup>, 2018). The alignment was performed by blastx (version 2.7.1+) requiring a maximum e-value of  $10^{-15}$  and searching in the orientation as transcript's 5'- to 3'-end. All the other options were set to default. A matched protein was required to contain  $\geq 60$  amino acids and  $\geq 75\%$  of its sequence was aligned. These criteria have been used previously to compile the CHES human gene catalog.

| number range of matched proteins | transcript models |            |
|----------------------------------|-------------------|------------|
|                                  | number            | percentage |
| 0                                | 9,823             | 69.05      |
| [1, 10]                          | 1,782             | 12.53      |
| (10, 50]                         | 1,002             | 7.04       |
| (50, 100]                        | 708               | 4.98       |
| >100                             | 911               | 6.40       |

**Supplementary Table 17. PRAM transcript plc\_f\_chr2\_minus.9034.1's matched proteins by BLAST.**

| species                        | name                                                                                | ID           |
|--------------------------------|-------------------------------------------------------------------------------------|--------------|
| <i>Aotus nancymaae</i>         | LOW QUALITY PROTEIN: putative uncharacterized protein encoded by LINC00596, partial | XP_021531542 |
| <i>Callithrix jacchus</i>      | PREDICTED: putative uncharacterized protein encoded by LINC00269, partial           | XP_017819497 |
| <i>Gorilla gorilla gorilla</i> | PREDICTED: ribosome biogenesis protein BMS1 homolog                                 | XP_018888574 |
| <i>Gorilla gorilla gorilla</i> | PREDICTED: ribosome biogenesis protein BMS1 homolog isoform X1                      | XP_018889689 |
| <i>Gorilla gorilla gorilla</i> | PREDICTED: ribosome biogenesis protein BMS1 homolog isoform X2                      | XP_018889690 |
| <i>Gorilla gorilla gorilla</i> | PREDICTED: ribosome biogenesis protein BMS1 homolog, partial                        | XP_018875818 |
| <i>Homo sapiens</i>            | FAM175A protein                                                                     | AAH16905     |
| <i>Homo sapiens</i>            | PRO1902                                                                             | AAF22026     |
| <i>Homo sapiens</i>            | hCG1814039, partial                                                                 | EAH68953     |
| <i>Homo sapiens</i>            | hCG1817437                                                                          | EAH47553     |
| <i>Homo sapiens</i>            | hCG1818479                                                                          | EAH95069     |
| <i>Homo sapiens</i>            | hCG1979495                                                                          | EAH55411     |
| <i>Homo sapiens</i>            | hCG2038438, partial                                                                 | EAH65538     |
| <i>Homo sapiens</i>            | hCG2038961, partial                                                                 | EAH48306     |
| <i>Homo sapiens</i>            | hCG2039009, partial                                                                 | EAH64637     |
| <i>Homo sapiens</i>            | hCG2039054, partial                                                                 | EAH89122     |
| <i>Homo sapiens</i>            | hCG2039105, partial                                                                 | EAX04768     |
| <i>Homo sapiens</i>            | hCG2039110, partial                                                                 | EAX06591     |
| <i>Homo sapiens</i>            | hCG2042258, partial                                                                 | EAH75601     |
| <i>Homo sapiens</i>            | hCG2042307                                                                          | EAH98491     |
| <i>Homo sapiens</i>            | ribosome biogenesis protein BMS1 homolog isoform X4                                 | XP_011516396 |
| <i>Homo sapiens</i>            | unnamed protein product                                                             | BAB15056     |
| <i>Homo sapiens</i>            | unnamed protein product                                                             | BAH12795     |
| <i>Homo sapiens</i>            | unnamed protein product                                                             | BAC85209     |
| <i>Homo sapiens</i>            | unnamed protein product                                                             | BAC04333     |
| <i>Macaca fascicularis</i>     | Putative BMS1-like protein ENSP00000383088, partial                                 | EAH64667     |
| <i>Macaca fascicularis</i>     | hypothetical protein EGM_00005, partial                                             | EAH62889     |
| <i>Macaca fascicularis</i>     | hypothetical protein EGM_00324, partial                                             | EAH49632     |
| <i>Macaca fascicularis</i>     | hypothetical protein EGM_01641                                                      | EAH50766     |
| <i>Macaca fascicularis</i>     | hypothetical protein EGM_01642, partial                                             | EAH50767     |
| <i>Macaca fascicularis</i>     | hypothetical protein EGM_01778, partial                                             | EAH50883     |
| <i>Macaca fascicularis</i>     | hypothetical protein EGM_01780, partial                                             | EAH50885     |
| <i>Macaca fascicularis</i>     | hypothetical protein EGM_03478, partial                                             | EAH66476     |

|                            |                                         |          |
|----------------------------|-----------------------------------------|----------|
| <i>Macaca fascicularis</i> | hypothetical protein EGM_03798, partial | EHH66749 |
| <i>Macaca fascicularis</i> | hypothetical protein EGM_04619, partial | EHH55411 |
| <i>Macaca fascicularis</i> | hypothetical protein EGM_04788, partial | EHH55556 |
| <i>Macaca fascicularis</i> | hypothetical protein EGM_04997, partial | EHH55734 |
| <i>Macaca fascicularis</i> | hypothetical protein EGM_08759, partial | EHH58816 |
| <i>Macaca fascicularis</i> | hypothetical protein EGM_08825, partial | EHH58869 |
| <i>Macaca fascicularis</i> | hypothetical protein EGM_09292, partial | EHH59230 |
| <i>Macaca fascicularis</i> | hypothetical protein EGM_09449, partial | EHH59362 |
| <i>Macaca fascicularis</i> | hypothetical protein EGM_10210, partial | EHH59972 |
| <i>Macaca fascicularis</i> | hypothetical protein EGM_11255, partial | EHH51808 |
| <i>Macaca fascicularis</i> | hypothetical protein EGM_11598, partial | EHH60270 |
| <i>Macaca fascicularis</i> | hypothetical protein EGM_11981, partial | EHH60591 |
| <i>Macaca fascicularis</i> | hypothetical protein EGM_12341, partial | EHH51985 |
| <i>Macaca fascicularis</i> | hypothetical protein EGM_12528, partial | EHH52138 |
| <i>Macaca fascicularis</i> | hypothetical protein EGM_14979, partial | EHH54194 |
| <i>Macaca fascicularis</i> | hypothetical protein EGM_15018, partial | EHH54230 |
| <i>Macaca fascicularis</i> | hypothetical protein EGM_15176, partial | EHH54354 |
| <i>Macaca fascicularis</i> | hypothetical protein EGM_15972, partial | EHH63076 |
| <i>Macaca fascicularis</i> | hypothetical protein EGM_16090, partial | EHH63176 |
| <i>Macaca fascicularis</i> | hypothetical protein EGM_17106, partial | EHH64004 |
| <i>Macaca fascicularis</i> | hypothetical protein EGM_17177, partial | EHH64058 |
| <i>Macaca fascicularis</i> | hypothetical protein EGM_17267, partial | EHH64131 |
| <i>Macaca fascicularis</i> | hypothetical protein EGM_17802, partial | EHH64557 |
| <i>Macaca fascicularis</i> | hypothetical protein EGM_17881          | EHH64622 |
| <i>Macaca fascicularis</i> | hypothetical protein EGM_18770, partial | EHH60881 |
| <i>Macaca fascicularis</i> | hypothetical protein EGM_19342, partial | EHH61346 |
| <i>Macaca fascicularis</i> | unnamed portein product                 | BAB01630 |
| <i>Macaca fascicularis</i> | unnamed protein product                 | BAE89602 |
| <i>Macaca fascicularis</i> | unnamed protein product                 | BAE89854 |
| <i>Macaca fascicularis</i> | unnamed protein product                 | BAE89454 |
| <i>Macaca mulatta</i>      | hypothetical protein EGK_00351, partial | EHH14429 |
| <i>Macaca mulatta</i>      | hypothetical protein EGK_01319, partial | EHH15253 |
| <i>Macaca mulatta</i>      | hypothetical protein EGK_01586, partial | EHH15486 |
| <i>Macaca mulatta</i>      | hypothetical protein EGK_02088, partial | EHH15918 |
| <i>Macaca mulatta</i>      | hypothetical protein EGK_02111, partial | EHH15935 |
| <i>Macaca mulatta</i>      | hypothetical protein EGK_02411, partial | EHH19699 |
| <i>Macaca mulatta</i>      | hypothetical protein EGK_03041, partial | EHH20232 |
| <i>Macaca mulatta</i>      | hypothetical protein EGK_03509, partial | EHH20620 |

|                            |                                                                                                |              |
|----------------------------|------------------------------------------------------------------------------------------------|--------------|
| <i>Macaca mulatta</i>      | hypothetical protein EGK_03652, partial                                                        | EHH20736     |
| <i>Macaca mulatta</i>      | hypothetical protein EGK_03802, partial                                                        | EHH20863     |
| <i>Macaca mulatta</i>      | hypothetical protein EGK_03909, partial                                                        | EHH20949     |
| <i>Macaca mulatta</i>      | hypothetical protein EGK_04085, partial                                                        | EHH21096     |
| <i>Macaca mulatta</i>      | hypothetical protein EGK_05144, partial                                                        | EHH21966     |
| <i>Macaca mulatta</i>      | hypothetical protein EGK_05194, partial                                                        | EHH22013     |
| <i>Macaca mulatta</i>      | hypothetical protein EGK_05619, partial                                                        | EHH22373     |
| <i>Macaca mulatta</i>      | hypothetical protein EGK_07177, partial                                                        | EHH23662     |
| <i>Macaca mulatta</i>      | hypothetical protein EGK_07262, partial                                                        | EHH23728     |
| <i>Macaca mulatta</i>      | hypothetical protein EGK_08749, partial                                                        | EHH24999     |
| <i>Macaca mulatta</i>      | hypothetical protein EGK_09403, partial                                                        | EHH29075     |
| <i>Macaca mulatta</i>      | hypothetical protein EGK_10762, partial                                                        | EHH30155     |
| <i>Macaca mulatta</i>      | hypothetical protein EGK_11692, partial                                                        | EHH16412     |
| <i>Macaca mulatta</i>      | hypothetical protein EGK_11851, partial                                                        | EHH16558     |
| <i>Macaca mulatta</i>      | hypothetical protein EGK_11888, partial                                                        | EHH16588     |
| <i>Macaca mulatta</i>      | hypothetical protein EGK_12471, partial                                                        | EHH31407     |
| <i>Macaca mulatta</i>      | hypothetical protein EGK_12542, partial                                                        | EHH31460     |
| <i>Macaca mulatta</i>      | hypothetical protein EGK_13122, partial                                                        | EHH31951     |
| <i>Macaca mulatta</i>      | hypothetical protein EGK_13267, partial                                                        | EHH16986     |
| <i>Macaca mulatta</i>      | hypothetical protein EGK_13278, partial                                                        | EHH16997     |
| <i>Macaca mulatta</i>      | hypothetical protein EGK_13471, partial                                                        | EHH17143     |
| <i>Macaca mulatta</i>      | hypothetical protein EGK_13706, partial                                                        | EHH17322     |
| <i>Macaca mulatta</i>      | hypothetical protein EGK_13768, partial                                                        | EHH17376     |
| <i>Macaca mulatta</i>      | hypothetical protein EGK_16111, partial                                                        | EHH26203     |
| <i>Macaca mulatta</i>      | hypothetical protein EGK_16433, partial                                                        | EHH26452     |
| <i>Macaca mulatta</i>      | hypothetical protein EGK_17439, partial                                                        | EHH27277     |
| <i>Macaca mulatta</i>      | hypothetical protein EGK_18274, partial                                                        | EHH27951     |
| <i>Macaca mulatta</i>      | hypothetical protein EGK_18276, partial                                                        | EHH27953     |
| <i>Macaca mulatta</i>      | hypothetical protein EGK_18756, partial                                                        | EHH28336     |
| <i>Macaca mulatta</i>      | hypothetical protein EGK_19508, partial                                                        | EHH18929     |
| <i>Macaca mulatta</i>      | hypothetical protein EGK_19530                                                                 | EHH18945     |
| <i>Macaca mulatta</i>      | hypothetical protein EGK_19543, partial                                                        | EHH18952     |
| <i>Macaca mulatta</i>      | hypothetical protein EGK_19562, partial                                                        | EHH18962     |
| <i>Macaca mulatta</i>      | hypothetical protein EGK_19586, partial                                                        | EHH18977     |
| <i>Macaca mulatta</i>      | hypothetical protein EGK_20357, partial                                                        | EHH30617     |
| <i>Macaca mulatta</i>      | hypothetical protein EGK_20358, partial                                                        | EHH30618     |
| <i>Macaca mulatta</i>      | hypothetical protein EGK_20417, partial                                                        | EHH30664     |
| <i>Nomascus leucogenys</i> | PREDICTED: LOW QUALITY PROTEIN: putative uncharacterized protein encoded by LINC00269, partial | XP_012353247 |

|                                  |                                                                                   |              |
|----------------------------------|-----------------------------------------------------------------------------------|--------------|
| <i>Nomascus leucogenys</i>       | PREDICTED: ribosome biogenesis protein BMS1 homolog, partial                      | XP_012365973 |
| <i>Pan troglodytes</i>           | retinal rod rhodopsin-sensitive cGMP 3',5'-cyclic phosphodiesterase subunit delta | BAK62850     |
| <i>Pan troglodytes</i>           | ribosome biogenesis protein BMS1 homolog                                          | XP_024208465 |
| <i>Papio anubis</i>              | putative uncharacterized protein encoded by LINC00269, partial                    | XP_009203223 |
| <i>Piliocolobus tephrosceles</i> | putative uncharacterized protein encoded by LINC00596, partial                    | XP_026311328 |
| <i>Pongo abelii</i>              | LOW QUALITY PROTEIN: IDNK isoform 1                                               | PNJ71634     |

**Supplementary Table 18. PRAM transcript plc\_f\_chr2\_minus.9034.2's matched proteins by BLAST.**

| species                        | name                                                                                | ID           |
|--------------------------------|-------------------------------------------------------------------------------------|--------------|
| <i>Aotus nancymaae</i>         | LOW QUALITY PROTEIN: putative uncharacterized protein encoded by LINC00596, partial | XP_021531542 |
| <i>Callithrix jacchus</i>      | PREDICTED: putative uncharacterized protein encoded by LINC00269, partial           | XP_017819497 |
| <i>Gorilla gorilla gorilla</i> | PREDICTED: putative uncharacterized protein encoded by LINC00269                    | XP_018871999 |
| <i>Gorilla gorilla gorilla</i> | PREDICTED: ribosome biogenesis protein BMS1 homolog                                 | XP_018888574 |
| <i>Gorilla gorilla gorilla</i> | PREDICTED: ribosome biogenesis protein BMS1 homolog isoform X1                      | XP_018889689 |
| <i>Gorilla gorilla gorilla</i> | PREDICTED: ribosome biogenesis protein BMS1 homolog isoform X2                      | XP_018889690 |
| <i>Gorilla gorilla gorilla</i> | PREDICTED: ribosome biogenesis protein BMS1 homolog, partial                        | XP_018875818 |
| <i>Homo sapiens</i>            | FAM175A protein                                                                     | AAH16905     |
| <i>Homo sapiens</i>            | PRO1902                                                                             | AAF22026     |
| <i>Homo sapiens</i>            | hCG1814039, partial                                                                 | EAH68953     |
| <i>Homo sapiens</i>            | hCG1817437                                                                          | EAH47553     |
| <i>Homo sapiens</i>            | hCG1818479                                                                          | EAH95069     |
| <i>Homo sapiens</i>            | hCG1979495                                                                          | EAH55411     |
| <i>Homo sapiens</i>            | hCG2038438, partial                                                                 | EAH65538     |
| <i>Homo sapiens</i>            | hCG2038961, partial                                                                 | EAH48306     |
| <i>Homo sapiens</i>            | hCG2039009, partial                                                                 | EAH64637     |
| <i>Homo sapiens</i>            | hCG2039054, partial                                                                 | EAH89122     |
| <i>Homo sapiens</i>            | hCG2039105, partial                                                                 | EAX04768     |
| <i>Homo sapiens</i>            | hCG2039110, partial                                                                 | EAX06591     |
| <i>Homo sapiens</i>            | hCG2042258, partial                                                                 | EAH75601     |
| <i>Homo sapiens</i>            | hCG2042307                                                                          | EAH98491     |
| <i>Homo sapiens</i>            | ribosome biogenesis protein BMS1 homolog isoform X4                                 | XP_011516396 |
| <i>Homo sapiens</i>            | unnamed protein product                                                             | BAB15056     |
| <i>Homo sapiens</i>            | unnamed protein product                                                             | BAH12795     |
| <i>Homo sapiens</i>            | unnamed protein product                                                             | BAC85209     |
| <i>Homo sapiens</i>            | unnamed protein product                                                             | BAC04333     |
| <i>Macaca fascicularis</i>     | Putative BMS1-like protein ENSP00000383088, partial                                 | EAH64667     |
| <i>Macaca fascicularis</i>     | hypothetical protein EGM_00005, partial                                             | EAH62889     |
| <i>Macaca fascicularis</i>     | hypothetical protein EGM_00324, partial                                             | EAH49632     |
| <i>Macaca fascicularis</i>     | hypothetical protein EGM_01641                                                      | EAH50766     |
| <i>Macaca fascicularis</i>     | hypothetical protein EGM_01642, partial                                             | EAH50767     |
| <i>Macaca fascicularis</i>     | hypothetical protein EGM_01778, partial                                             | EAH50883     |
| <i>Macaca fascicularis</i>     | hypothetical protein EGM_01780, partial                                             | EAH50885     |

|                            |                                         |          |
|----------------------------|-----------------------------------------|----------|
| <i>Macaca fascicularis</i> | hypothetical protein EGM_03478, partial | EHH66476 |
| <i>Macaca fascicularis</i> | hypothetical protein EGM_03798, partial | EHH66749 |
| <i>Macaca fascicularis</i> | hypothetical protein EGM_04619, partial | EHH55411 |
| <i>Macaca fascicularis</i> | hypothetical protein EGM_04788, partial | EHH55556 |
| <i>Macaca fascicularis</i> | hypothetical protein EGM_04997, partial | EHH55734 |
| <i>Macaca fascicularis</i> | hypothetical protein EGM_08759, partial | EHH58816 |
| <i>Macaca fascicularis</i> | hypothetical protein EGM_08825, partial | EHH58869 |
| <i>Macaca fascicularis</i> | hypothetical protein EGM_09292, partial | EHH59230 |
| <i>Macaca fascicularis</i> | hypothetical protein EGM_09449, partial | EHH59362 |
| <i>Macaca fascicularis</i> | hypothetical protein EGM_10210, partial | EHH59972 |
| <i>Macaca fascicularis</i> | hypothetical protein EGM_11255, partial | EHH51808 |
| <i>Macaca fascicularis</i> | hypothetical protein EGM_11598, partial | EHH60270 |
| <i>Macaca fascicularis</i> | hypothetical protein EGM_11981, partial | EHH60591 |
| <i>Macaca fascicularis</i> | hypothetical protein EGM_12341, partial | EHH51985 |
| <i>Macaca fascicularis</i> | hypothetical protein EGM_12528, partial | EHH52138 |
| <i>Macaca fascicularis</i> | hypothetical protein EGM_14979, partial | EHH54194 |
| <i>Macaca fascicularis</i> | hypothetical protein EGM_15018, partial | EHH54230 |
| <i>Macaca fascicularis</i> | hypothetical protein EGM_15176, partial | EHH54354 |
| <i>Macaca fascicularis</i> | hypothetical protein EGM_15972, partial | EHH63076 |
| <i>Macaca fascicularis</i> | hypothetical protein EGM_16090, partial | EHH63176 |
| <i>Macaca fascicularis</i> | hypothetical protein EGM_17106, partial | EHH64004 |
| <i>Macaca fascicularis</i> | hypothetical protein EGM_17177, partial | EHH64058 |
| <i>Macaca fascicularis</i> | hypothetical protein EGM_17267, partial | EHH64131 |
| <i>Macaca fascicularis</i> | hypothetical protein EGM_17802, partial | EHH64557 |
| <i>Macaca fascicularis</i> | hypothetical protein EGM_17881          | EHH64622 |
| <i>Macaca fascicularis</i> | hypothetical protein EGM_18770, partial | EHH60881 |
| <i>Macaca fascicularis</i> | hypothetical protein EGM_19342, partial | EHH61346 |
| <i>Macaca fascicularis</i> | unnamed portein product                 | BAB01630 |
| <i>Macaca fascicularis</i> | unnamed protein product                 | BAE89602 |
| <i>Macaca fascicularis</i> | unnamed protein product                 | BAE89854 |
| <i>Macaca fascicularis</i> | unnamed protein product                 | BAE89454 |
| <i>Macaca mulatta</i>      | hypothetical protein EGK_00351, partial | EHH14429 |
| <i>Macaca mulatta</i>      | hypothetical protein EGK_01319, partial | EHH15253 |
| <i>Macaca mulatta</i>      | hypothetical protein EGK_01586, partial | EHH15486 |
| <i>Macaca mulatta</i>      | hypothetical protein EGK_02088, partial | EHH15918 |
| <i>Macaca mulatta</i>      | hypothetical protein EGK_02111, partial | EHH15935 |
| <i>Macaca mulatta</i>      | hypothetical protein EGK_02411, partial | EHH19699 |
| <i>Macaca mulatta</i>      | hypothetical protein EGK_03041, partial | EHH20232 |



|                       |                                         |          |
|-----------------------|-----------------------------------------|----------|
| <i>Macaca mulatta</i> | hypothetical protein EGK_03509, partial | EHH20620 |
| <i>Macaca mulatta</i> | hypothetical protein EGK_03652, partial | EHH20736 |
| <i>Macaca mulatta</i> | hypothetical protein EGK_03802, partial | EHH20863 |
| <i>Macaca mulatta</i> | hypothetical protein EGK_03909, partial | EHH20949 |
| <i>Macaca mulatta</i> | hypothetical protein EGK_04085, partial | EHH21096 |
| <i>Macaca mulatta</i> | hypothetical protein EGK_05144, partial | EHH21966 |
| <i>Macaca mulatta</i> | hypothetical protein EGK_05194, partial | EHH22013 |
| <i>Macaca mulatta</i> | hypothetical protein EGK_05619, partial | EHH22373 |
| <i>Macaca mulatta</i> | hypothetical protein EGK_07177, partial | EHH23662 |
| <i>Macaca mulatta</i> | hypothetical protein EGK_07262, partial | EHH23728 |
| <i>Macaca mulatta</i> | hypothetical protein EGK_08749, partial | EHH24999 |
| <i>Macaca mulatta</i> | hypothetical protein EGK_09403, partial | EHH29075 |
| <i>Macaca mulatta</i> | hypothetical protein EGK_10762, partial | EHH30155 |
| <i>Macaca mulatta</i> | hypothetical protein EGK_11692, partial | EHH16412 |
| <i>Macaca mulatta</i> | hypothetical protein EGK_11851, partial | EHH16558 |
| <i>Macaca mulatta</i> | hypothetical protein EGK_11888, partial | EHH16588 |
| <i>Macaca mulatta</i> | hypothetical protein EGK_12471, partial | EHH31407 |
| <i>Macaca mulatta</i> | hypothetical protein EGK_12542, partial | EHH31460 |
| <i>Macaca mulatta</i> | hypothetical protein EGK_13122, partial | EHH31951 |
| <i>Macaca mulatta</i> | hypothetical protein EGK_13267, partial | EHH16986 |
| <i>Macaca mulatta</i> | hypothetical protein EGK_13278, partial | EHH16997 |
| <i>Macaca mulatta</i> | hypothetical protein EGK_13471, partial | EHH17143 |
| <i>Macaca mulatta</i> | hypothetical protein EGK_13706, partial | EHH17322 |
| <i>Macaca mulatta</i> | hypothetical protein EGK_13768, partial | EHH17376 |
| <i>Macaca mulatta</i> | hypothetical protein EGK_16111, partial | EHH26203 |
| <i>Macaca mulatta</i> | hypothetical protein EGK_16433, partial | EHH26452 |
| <i>Macaca mulatta</i> | hypothetical protein EGK_17439, partial | EHH27277 |
| <i>Macaca mulatta</i> | hypothetical protein EGK_18274, partial | EHH27951 |
| <i>Macaca mulatta</i> | hypothetical protein EGK_18276, partial | EHH27953 |
| <i>Macaca mulatta</i> | hypothetical protein EGK_18756, partial | EHH28336 |
| <i>Macaca mulatta</i> | hypothetical protein EGK_19508, partial | EHH18929 |
| <i>Macaca mulatta</i> | hypothetical protein EGK_19530          | EHH18945 |
| <i>Macaca mulatta</i> | hypothetical protein EGK_19543, partial | EHH18952 |
| <i>Macaca mulatta</i> | hypothetical protein EGK_19562, partial | EHH18962 |
| <i>Macaca mulatta</i> | hypothetical protein EGK_19586, partial | EHH18977 |
| <i>Macaca mulatta</i> | hypothetical protein EGK_20357, partial | EHH30617 |
| <i>Macaca mulatta</i> | hypothetical protein EGK_20358, partial | EHH30618 |
| <i>Macaca mulatta</i> | hypothetical protein EGK_20417, partial | EHH30664 |

|                                  |                                                                                                |              |
|----------------------------------|------------------------------------------------------------------------------------------------|--------------|
| <i>Nomascus leucogenys</i>       | PREDICTED: LOW QUALITY PROTEIN: putative uncharacterized protein encoded by LINC00269, partial | XP_012353247 |
| <i>Nomascus leucogenys</i>       | PREDICTED: ribosome biogenesis protein BMS1 homolog, partial                                   | XP_012365973 |
| <i>Pan troglodytes</i>           | LOW QUALITY PROTEIN: IDNK isoform 2                                                            | PN162172     |
| <i>Pan troglodytes</i>           | retinal rod rhodopsin-sensitive cGMP 3',5'-cyclic phosphodiesterase subunit delta              | BAK62850     |
| <i>Pan troglodytes</i>           | ribosome biogenesis protein BMS1 homolog                                                       | XP_024208465 |
| <i>Papio anubis</i>              | putative uncharacterized protein encoded by LINC00269, partial                                 | XP_009203223 |
| <i>Piliocolobus tephrosceles</i> | putative uncharacterized protein encoded by LINC00596, partial                                 | XP_026311328 |
| <i>Pongo abelii</i>              | LOW QUALITY PROTEIN: IDNK isoform 1                                                            | PNJ71634     |

**Supplementary Table 19. Number of PRAM transcripts stratified by the fractions of their exons that overlap with PhyloCSF-predicted coding regions.** Overlap is required to be on the same strand regardless of frame.

| range of fraction | number of transcripts |
|-------------------|-----------------------|
| 0                 | 13730                 |
| (0, 0.1]          | 432                   |
| (0.1, 0.2]        | 27                    |
| (0.2, 0.3]        | 12                    |
| (0.3, 0.4]        | 11                    |
| (0.4, 0.5]        | 3                     |
| (0.5, 0.6]        | 8                     |
| (0.6, 0.7]        | 1                     |
| (0.7, 0.8]        | 2                     |
| (0.8, 0.9]        | 0                     |
| (0.9, 1]          | 0                     |

**Supplementary Table 20. Number of human transcripts predicted by '1-Step' and '2-Step' methods.**

Models were predicted by '1-Step' method ('pooling + Cufflinks') and '2-Step' methods ('Cufflinks + Cuffmerge'; 'Cufflinks + TACO') based on the 30 human RNA-seq datasets in Supplementary Table 1. Expression levels of models were determined by the six GM12878 RNA-seq datasets and the eight K562 RNA-seq datasets listed in Supplementary Table 1. The number of models that were shown as points in Supplementary Figure 33 and Supplementary Figure 34 are highlighted. For 'pooling + Cufflinks', the highlighted thirteen models with TPMs in '[0.1, 1)' in GM12878 were not identical and differed by two in each mappability selection category. Similarly, the highlighted seventeen models with TPMs in '[0.1, 1)' K562 were not identical either and differed by one in each category. The highlighted model with TPM  $\geq 1$  in GM12878 is the same one in each mappability selection category.

| method                | master list | method specific <sup>§</sup> | TPM range     | GM12878       |                                           |                                              | K562          |                                           |                                              |
|-----------------------|-------------|------------------------------|---------------|---------------|-------------------------------------------|----------------------------------------------|---------------|-------------------------------------------|----------------------------------------------|
|                       |             |                              |               | by TPM range* | promoter mappability $\geq 0.8^{\dagger}$ | transcript mappability $\geq 0.8^{\ddagger}$ | by TPM range* | promoter mappability $\geq 0.8^{\dagger}$ | transcript mappability $\geq 0.8^{\ddagger}$ |
| pooling + Cufflinks   | 14,226      | 3,082                        | < 0.1         | 2,160         | 1,100                                     | 1,359                                        | 2,175         | 1,244                                     | 1,463                                        |
|                       |             |                              | [0.1, 1)      | 28            | 13                                        | 13                                           | 25            | 17                                        | 17                                           |
|                       |             |                              | $\geq 1$      | 1             | 1                                         | 1                                            | 3             | 0                                         | 0                                            |
|                       |             |                              | indeterminate | 893           | 510                                       | 594                                          | 879           | 363                                       | 487                                          |
| Cufflinks + Cuffmerge | 8,779       | 251                          | < 0.1         | 157           | 115                                       | 124                                          | 156           | 126                                       | 135                                          |
|                       |             |                              | [0.1, 1)      | 5             | 4                                         | 4                                            | 1             | 1                                         | 1                                            |
|                       |             |                              | $\geq 1$      | 1             | 1                                         | 1                                            | 0             | 0                                         | 0                                            |
|                       |             |                              | indeterminate | 88            | 79                                        | 81                                           | 94            | 72                                        | 74                                           |
| Cufflinks + TACO      | 10,147      | 476                          | < 0.1         | 297           | 171                                       | 200                                          | 304           | 199                                       | 232                                          |
|                       |             |                              | [0.1, 1)      | 7             | 3                                         | 5                                            | 4             | 1                                         | 1                                            |
|                       |             |                              | $\geq 1$      | 6             | 3                                         | 1                                            | 6             | 1                                         | 3                                            |
|                       |             |                              | indeterminate | 166           | 103                                       | 114                                          | 162           | 79                                        | 84                                           |

<sup>§</sup> Models that were predicted by only one method and not by the other two. Their genomic spans did not overlap with any other model's genomic span on the same strand predicted by the other two methods.

\* Defined in the same way as Supplementary Table 12.

<sup>†</sup> Defined in the same way as Supplementary Table 12.

<sup>‡</sup> Defined in the same way as Supplementary Table 12.

**Supplementary Table 21. Hematopoietic mouse ENCODE RNA-seq datasets.** Each accession contains two RNA-seq replicates and there are 32 RNA-seq datasets in total. All of the datasets are paired-end on untreated cells related to hematopoiesis. In order to include as many datasets as possible, both RNA-seq and poly(A) mRNA RNA-seq data were collected.

| <b>Accession<sup>1</sup></b> | <b>Cell</b>                               | <b>Assay</b>         |
|------------------------------|-------------------------------------------|----------------------|
| ENCSR767VHR                  | CMP                                       | RNA-seq              |
| ENCSR826IXR                  | G1E                                       | RNA-seq              |
| ENCSR000CHV                  | G1E                                       | poly(A) mRNA RNA-seq |
| ENCSR000CHY                  | G1E-ER4                                   | poly(A) mRNA RNA-seq |
| ENCSR833HPM                  | GMP                                       | RNA-seq              |
| ENCSR549QME                  | MEP                                       | RNA-seq              |
| ENCSR661TLW                  | erythroblast                              | RNA-seq              |
| ENCSR000CHS                  | erythroblast                              | poly(A) mRNA RNA-seq |
| ENCSR558PXY                  | erythroid progenitor cell                 | RNA-seq              |
| ENCSR000CHU                  | hematopoietic multipotent progenitor cell | poly(A) mRNA RNA-seq |
| ENCSR236ZIE                  | hematopoietic stem cell                   | RNA-seq              |
| ENCSR000CHT                  | leukemia stem cell                        | poly(A) mRNA RNA-seq |
| ENCSR340NCF                  | megakaryocyte                             | RNA-seq              |
| ENCSR000CIC                  | megakaryocyte                             | poly(A) mRNA RNA-seq |
| ENCSR848LXY                  | megakaryocyte progenitor cell             | RNA-seq              |
| ENCSR000CIF                  | megakaryocyte-erythroid progenitor cell   | poly(A) mRNA RNA-seq |

<sup>1</sup>ENCODE RNA-seq experiment accession ID (<https://www.encodeproject.org>)

**Supplementary Table 22. Mouse hematopoiesis-related RNA-seq datasets.**

| Name         | Source                          | Condition A | Condition B                             | Accession <sup>1</sup> | Reference            |
|--------------|---------------------------------|-------------|-----------------------------------------|------------------------|----------------------|
| AGM          | aorta-gonad-mesonephros         | wild type   | <i>Gata2</i> +9.5 enhancer deletion     | N/A                    | Gao et al. 2013      |
| fetal livers | fetal livers                    | wild type   | <i>Gata2</i> -77 enhancer knockout      | GSE69786               | Johnson et al. 2015  |
| G1E          | G1E-ER-GATA1                    | untreated   | $\beta$ -estradiol treated              | GSE74371               | Tanimura et al. 2016 |
| ES           | pluripotent embryonic stem cell | wild type   | nuclear RNase ( <i>Exosc10</i> ) mutant | SRP042355              | Pefanis et al. 2015  |

<sup>1</sup>Accession ID for Gene Expression Omnibus (<https://www.ncbi.nlm.nih.gov/geo/>) or Sequence Read Archive (<https://www.ncbi.nlm.nih.gov/sra>)

**Supplementary Table 23. Number of selected PRAM mouse gene and transcript models.**

| Selection step                                                                                          | Number of models |            |
|---------------------------------------------------------------------------------------------------------|------------------|------------|
|                                                                                                         | Gene             | Transcript |
| a transcript has $\geq 2$ exons and with genomic span $\geq 200$ bp                                     | 6969             | 8652       |
| a gene does not overlap with any GENCODE or RefSeq gene on either strand and has mappability $\geq 0.8$ | 2657             | 3189       |
| a gene is differentially expressed in $\geq 2$ hematopoiesis-related systems                            | 10               | 18         |
| a gene maps to one chromosome on one strand in hg38                                                     | 7                | 14         |
| a gene has all exons with mappability $\geq 0.001$ and at least one exon with mappability $\geq 0.8$    | 6                | 13         |

**Supplementary Table 24. GATA2 and TAL1 mouse ChIP-seq datasets.**

| Accession <sup>1</sup> | Cell                                      | Treatment      | Antibody | Alias                  |
|------------------------|-------------------------------------------|----------------|----------|------------------------|
| GSE69776               | 416b                                      | None           | GATA2    | 416B_GATA2_Rep1        |
|                        |                                           |                | TAL1     | 416B_TAL1_Rep1         |
|                        |                                           |                | IgGR     | 416B_Input_Rep1        |
| GSE22178               | HPC7                                      | None           | GATA2    | HPC7_GATA2_Rep1        |
|                        |                                           |                | TAL1     | HPC7_TAL1_Rep1         |
|                        |                                           |                | IgG      | HPC7_Input_Rep1        |
| GSE31331               | G1ME                                      | None           | GATA2    | G1ME_GATA2_Rep1        |
|                        |                                           |                |          | G1ME_GATA2_Rep2        |
|                        |                                           |                | None     | G1ME_Input_Rep1        |
| GSE26031               | Lin- bone marrow hematopoietic progenitor | None           | GATA2    | LIN_GATA2_Rep1         |
|                        |                                           |                | TAL1     | LIN_TAL1_Rep1          |
|                        |                                           |                | IgG      | LIN_Input_Rep1         |
|                        |                                           |                |          | LIN_Input_Rep2         |
| GSE29193               | G1E                                       | BMP            | GATA2    | G1Echb_GATA2_BMP_Rep1  |
|                        |                                           |                | None     | G1Echb_Input_BMP_Rep1  |
| PRJEB2019              | MEL                                       | DMSO           | TAL1     | MELera_TAL1_DMSO_Rep1  |
|                        |                                           |                | Input    | MELera_Input_DMSO_Rep1 |
|                        |                                           | None           | TAL1     | MELera_TAL1_Rep1       |
|                        |                                           |                |          | MELera_TAL1_Rep2       |
|                        |                                           |                | Input    | MELera_Input_Rep1      |
|                        |                                           |                |          | MELera_Input_Rep2      |
| GSE36029               | G1E                                       | None           | GATA2    | G1Epsu_GATA2_Rep1      |
|                        |                                           |                |          | G1Epsu_GATA2_Rep2      |
|                        |                                           |                | TAL1     | G1Epsu_TAL1_Rep1       |
|                        |                                           |                |          | G1Epsu_TAL1_Rep2       |
|                        |                                           |                | Input    | G1Epsu_Input_Rep1      |
|                        |                                           |                |          | G1Epsu_Input_Rep2      |
|                        | G1E-ER4                                   | diffProtD_24hr | GATA2    | G1EER4psu_GATA2_Rep1   |
|                        |                                           |                |          | G1EER4psu_GATA2_Rep2   |
|                        |                                           |                | TAL1     | G1EER4psu_TAL1_Rep1    |
|                        |                                           |                |          | G1EER4psu_TAL1_Rep2    |
|                        |                                           |                | Input    | G1EER4psu_Input_Rep1   |
|                        |                                           |                |          | G1EER4psu_Input_Rep2   |
|                        | MEL                                       | None           | TAL1     | MELpsu_TAL1_Rep1       |
|                        |                                           |                |          | MELpsu_TAL1_Rep2       |
|                        |                                           |                | Input    | MELpsu_Input_Rep1      |
|                        |                                           |                |          | MELpsu_Input_Rep2      |
|                        | Erythroblast, ter119+ cells from liver    | None           | TAL1     | ERYpsu_TAL1_Rep1       |
|                        |                                           |                |          | ERYpsu_TAL1_Rep2       |
|                        |                                           |                |          | ERYpsu_TAL1_Rep3       |
|                        |                                           |                | Input    | ERYpsu_Input_Rep1      |
|                        |                                           |                |          | ERYpsu_Input_Rep2      |
|                        |                                           |                |          |                        |
|                        | Megakaryocyte                             | None           | TAL1     | MEGpsu_TAL1_Rep1       |
|                        |                                           |                |          | MEGpsu_TAL1_Rep2       |



|          |                                     |                      |                   |                             |
|----------|-------------------------------------|----------------------|-------------------|-----------------------------|
|          |                                     |                      |                   | MEGpsu_TAL1_Rep3            |
|          |                                     |                      |                   | MEGpsu_TAL1_Rep4            |
|          |                                     |                      | Input             | MEGpsu_Input_Rep1           |
|          |                                     |                      |                   | MEGpsu_Input_Rep2           |
| GSE30142 | G1E                                 | None                 | GATA2             | G1Epsu2_GATA2_Rep1          |
|          |                                     |                      |                   | G1Epsu2_GATA2_Rep2          |
|          |                                     |                      | TAL1              | G1Epsu2_TAL1_Rep1           |
|          |                                     |                      |                   | G1Epsu2_TAL1_Rep2           |
|          |                                     |                      | Input             | G1Epsu2_Input_Rep1          |
|          |                                     |                      |                   | G1E-ER4                     |
|          | G1EER4psu2_GATA2_Rep2               |                      |                   |                             |
|          | TAL1                                | G1EER4psu2_TAL1_Rep1 |                   |                             |
|          |                                     | G1EER4psu2_TAL1_Rep2 |                   |                             |
|          |                                     | G1EER4psu2_TAL1_Rep3 |                   |                             |
|          |                                     | G1EER4psu2_TAL1_Rep4 |                   |                             |
|          | Ter119+                             | None                 | TAL1              | TERpsu2_TAL1_Rep1           |
|          |                                     |                      |                   | TERpsu2_TAL1_Rep2           |
|          |                                     |                      | Input             | TERpsu2_Input_Rep1          |
| GSE18720 |                                     |                      |                   | fetal liver erythroblast WT |
|          | fetal liver erythroblast RER mutant | Input                | FLE_Input_Rep1    |                             |
|          |                                     | TAL1                 | FLERER_TAL1_Rep1  |                             |
|          |                                     | Input                | FLERER_Input_Rep1 |                             |

<sup>1</sup>Accession ID for Gene Expression Omnibus (<https://www.ncbi.nlm.nih.gov/geo/>) or BioProject (<https://www.ncbi.nlm.nih.gov/bioproject/>),

**Supplementary Table 25. PCR primers and their sequences.**

| name                       | sequence                   |
|----------------------------|----------------------------|
| mouse                      |                            |
| CUFFm.chr12.32594 F        | GGTGA CTGT TAGGTACCATGTGGG |
| CUFFm.chr12.32594 R        | GGAGGCTAGATTCCCATGGTAGC    |
| CUFFm.chr12.33668 R        | GAGCCTCAGCGACAAGGCC        |
| CUFFm.chr12.33668 F        | CAGCTGCCAGGACCACTCC        |
| CUFFm.chr12 33668 1.2 F    | GACCTGGGCTCTTCCACCC        |
| CUFFm.chr12 33668 1.3 R    | TGACGAGAGCCATCAGAAGC       |
| CUFFm.chr12 33668 2.1 F 9  | CTATCACACTCTTGCTGTCAATG    |
| CUFFm.chr12 33668 2.2 F    | GAGACACCTGGCAACAGTACTT     |
| CUFFm.chr12 33668 2.2 R    | GGCTACACCTAGAGCTGCTCTC     |
| CUFFm.chr12 33668 2.3 R    | CCAGACGGCAACCGTACAGT       |
| CUFFm.chr17.20196 R        | GATTCCTTCGATGGACGTGCC      |
| CUFFm.chr17.20196 F        | GA CTGCCCACCCACCATTCT      |
| CUFFp.chr10.20259 F2       | TGTCCATGTCTGCATAGCGGT      |
| CUFFp.chr10.20259 R2       | GATGTCTGTGGGTATTGGCTC      |
| CUFFp.chr12.15498 1F       | GACTTCGGACCCTGCTTGTC       |
| CUFFp.chr12.15498 2F       | GCTATGCCATCCTGCCTGTC       |
| CUFFp.chr12.15498 R        | CAGAGCATGGGATGATGTCACC     |
| CUFFm.chr10.13181 F        | GGCAGCACGACCATGAGGC        |
| CUFFm.chr10.13181 34R      | CGCATCCACTTCTCGCAGTTAAC    |
| CUFFm.chr10.13181 2R       | CCACTGAGCCATCTCGCCAG       |
| <i>Gata1</i> e4 5F         | GGTTCACCTGATGGAGCTTGA      |
| <i>Gata1</i> e4 5R         | GGCCCAAGAAGCGAATGATT       |
| <i>Gata2</i> e6 R          | GCACTTGGAGAGCTCCTCG        |
| <i>Gata2</i> e5 F          | GGCACCTGTTGTGCAAATTGTCA    |
| <i>Pik3cg</i> e6 F         | CTGATCCCACAGTCCTATCC       |
| <i>Pik3cg</i> e7 R         | GGTCCAGAGATTCA GTCTCC      |
| <i>Prkar2b</i> e4 F        | ACCGATGATCAGAGAAACAGAT     |
| <i>Prkar2b</i> e5 R        | TCACCGTCATCACCTTGGTC       |
| human                      |                            |
| CUFFm.chr7.6148 1.1 2.1 F1 | CATCCCGTGGTGTGAAGAG        |
| CUFFm.chr7.6148 1.1 2.1 F2 | ATACTTTCACCACAGCACACC      |
| CUFFm.chr7.6148 1.1 2.1 R  | GTGCGTCCCTGTTTGCCGC        |

|                           |                          |
|---------------------------|--------------------------|
| CUFFm.chr7.6148 1.2 2.2 R | GGAGCACTCCCATGAATCCT     |
| CUFFm.chr7.6148 1.2 F     | GTAGAGACGGGGTTTCACAG     |
| CUFFm.chr7.6148 1.3 R     | CTGTCTAGTGACCTTGCAGC     |
| CUFFm.chr7.6148 2.2 F     | GCCTGCCCAGACCTTGGAC      |
| CUFFm.chr7.6148 2.3 R     | CCGTAGTCAGTCCCAGGTAC     |
| <i>PIK3CG</i> e6 F        | TGCCGATCCTACAGCCCTATC    |
| <i>PIK3CG</i> e7 R        | GATCCAAAGATTCAGTCTCCCA   |
| <i>PRKAR2B</i> e4 F       | ATCAAGGTGACGATGGTGACAACT |
| <i>PRKAR2B</i> e5 R       | GTTGCGCCGAAACTCCCACG     |

**Supplementary Table 26. Expression levels of the six PRAM gene models.** Expression levels are represented in TPM. Conditions that have a model's TPM  $\geq 1$  in all replicates were highlighted. Dataset names correspond to those in Supplementary Table 22.

| Gene model ID     | AGM                        |       |       |           |       |       | fetal livers |      |      |      |      |      |
|-------------------|----------------------------|-------|-------|-----------|-------|-------|--------------|------|------|------|------|------|
|                   | Mutant                     |       |       | WT        |       |       | Mutant       |      |      | WT   |      |      |
|                   | Rep1                       | Rep2  | Rep3  | Rep1      | Rep2  | Rep3  | Rep1         | Rep2 | Rep3 | Rep1 | Rep2 | Rep3 |
| CUFFm.chr12.32594 | 0.02                       | 0.03  | 0.04  | 3.14      | 3.91  | 1.36  | 0.00         | 0.14 | 0.18 | 1.45 | 0.50 | 0.49 |
| CUFFm.chr12.33668 | 0.05                       | 0.05  | 0.12  | 3.73      | 5.83  | 0.85  | 0.03         | 0.14 | 0.13 | 0.65 | 0.43 | 0.20 |
| CUFFm.chr17.20196 | 0.20                       | 0.24  | 0.11  | 0.38      | 0.50  | 0.31  | 0.14         | 0.40 | 0.35 | 0.56 | 0.33 | 0.41 |
| CUFFp.chr10.20259 | 0.31                       | 0.18  | 0.21  | 1.31      | 1.52  | 0.60  | 0.00         | 0.03 | 0.04 | 0.13 | 0.09 | 0.07 |
| CUFFp.chr12.15498 | 0.05                       | 0.16  | 0.01  | 0.90      | 1.06  | 0.16  | 0.01         | 0.11 | 0.05 | 0.19 | 0.15 | 0.01 |
| CUFFm.chr10.13181 | 0.63                       | 0.26  | 0.26  | 0.49      | 0.82  | 0.38  | 1.65         | 0.71 | 0.64 | 0.87 | 0.96 | 0.62 |
|                   |                            |       |       |           |       |       |              |      |      |      |      |      |
| Gene model ID     | G1E                        |       |       |           |       |       | ES           |      |      |      |      |      |
|                   | $\beta$ -estradiol treated |       |       | untreated |       |       | KO           |      |      | WT   |      |      |
|                   | Rep1                       | Rep2  | Rep3  | Rep1      | Rep2  | Rep3  | Rep1         | Rep2 |      | Rep1 | Rep2 |      |
| CUFFm.chr12.32594 | 0.04                       | 0.02  | 0.05  | 0.70      | 0.64  | 0.53  | 0.00         | 0.00 |      | 0.00 | 0.00 |      |
| CUFFm.chr12.33668 | 59.31                      | 61.94 | 61.20 | 2.73      | 2.57  | 2.44  | 0.00         | 0.00 |      | 0.00 | 0.00 |      |
| CUFFm.chr17.20196 | 2.08                       | 2.03  | 2.03  | 0.26      | 0.26  | 0.18  | 0.02         | 0.01 |      | 0.01 | 0.01 |      |
| CUFFp.chr10.20259 | 25.29                      | 25.86 | 26.03 | 10.68     | 10.27 | 10.34 | 0.01         | 0.01 |      | 0.00 | 0.00 |      |
| CUFFp.chr12.15498 | 12.99                      | 13.80 | 14.48 | 0.93      | 0.98  | 0.85  | 0.00         | 0.00 |      | 0.00 | 0.00 |      |
| CUFFm.chr10.13181 | 0.11                       | 0.00  | 0.16  | 0.36      | 0.83  | 0.95  | 0.54         | 0.46 |      | 1.28 | 1.15 |      |

**Supplementary Table 27. Number of ‘2-Step’ and Cufflinks models overlapping with the four validated ‘1-Step’ models.** Models were built either by ‘2-Step’ methods (‘Cufflinks + Cuffmerge’ and ‘Cufflinks + TACO’) or by Cufflinks based on individual RNA-seq data sets (labeled by DCC accession ID and biological replicate index). The four PRAM models detected by semi-qRT-PCR are: CUFFm.chr12.33668, CUFFm.chr17.20196, CUFFp.chr10.20259, and CUFFp.chr12.15498.

| Method                | Number of gene models in each selection step |                    |                        |                                      |
|-----------------------|----------------------------------------------|--------------------|------------------------|--------------------------------------|
|                       | built                                        | by DE <sup>1</sup> | by DE and conservation | by DE, conservation, and mappability |
| Cufflinks + Cuffmerge | 4                                            | 3                  | 2                      | 2                                    |
| Cufflinks + TACO      | 3                                            | 0                  | 0                      | 0                                    |
| ENCSR000CHS.Rep1      | 3                                            | 1                  | 1                      | 1                                    |
| ENCSR000CHS.Rep2      | 2                                            | 0                  | 0                      | 0                                    |
| ENCSR000CHT.Rep1      | 1                                            | 1                  | 1                      | 1                                    |
| ENCSR000CHT.Rep2      | 1                                            | 0                  | 0                      | 0                                    |
| ENCSR000CHU.Rep1      | 4                                            | 0                  | 0                      | 0                                    |
| ENCSR000CHU.Rep2      | 1                                            | 0                  | 0                      | 0                                    |
| ENCSR000CHV.Rep1      | 5                                            | 0                  | 0                      | 0                                    |
| ENCSR000CHV.Rep2      | 3                                            | 0                  | 0                      | 0                                    |
| ENCSR000CHY.Rep1      | 5                                            | 0                  | 0                      | 0                                    |
| ENCSR000CHY.Rep2      | 2                                            | 0                  | 0                      | 0                                    |
| ENCSR000CIC.Rep1      | 2                                            | 0                  | 0                      | 0                                    |
| ENCSR000CIC.Rep2      | 0                                            | 0                  | 0                      | 0                                    |
| ENCSR000CIF.Rep1      | 2                                            | 0                  | 0                      | 0                                    |
| ENCSR000CIF.Rep2      | 2                                            | 0                  | 0                      | 0                                    |
| ENCSR236ZIE.Rep1      | 0                                            | 0                  | 0                      | 0                                    |
| ENCSR236ZIE.Rep2      | 3                                            | 0                  | 0                      | 0                                    |
| ENCSR340NCF.Rep1      | 1                                            | 0                  | 0                      | 0                                    |
| ENCSR340NCF.Rep2      | 0                                            | 0                  | 0                      | 0                                    |
| ENCSR549QME.Rep1      | 0                                            | 0                  | 0                      | 0                                    |
| ENCSR549QME.Rep2      | 1                                            | 0                  | 0                      | 0                                    |
| ENCSR558PXY.Rep1      | 1                                            | 1                  | 1                      | 1                                    |
| ENCSR558PXY.Rep2      | 1                                            | 1                  | 1                      | 1                                    |
| ENCSR661TLW.Rep1      | 3                                            | 1                  | 1                      | 1                                    |
| ENCSR661TLW.Rep2      | 1                                            | 1                  | 1                      | 1                                    |
| ENCSR767VHR.Rep1      | 0                                            | 0                  | 0                      | 0                                    |
| ENCSR767VHR.Rep2      | 0                                            | 0                  | 0                      | 0                                    |
| ENCSR826IXR.Rep1      | 3                                            | 1                  | 1                      | 1                                    |
| ENCSR826IXR.Rep2      | 3                                            | 1                  | 1                      | 1                                    |
| ENCSR833HPM.Rep1      | 0                                            | 0                  | 0                      | 0                                    |
| ENCSR833HPM.Rep2      | 1                                            | 0                  | 0                      | 0                                    |
| ENCSR848LXY.Rep1      | 1                                            | 0                  | 0                      | 0                                    |
| ENCSR848LXY.Rep2      | 1                                            | 0                  | 0                      | 0                                    |

<sup>1</sup> Selection by DE requires that gene model is differentially expressed in  $\geq 2$  experiments.

**Supplementary Table 28. ‘2-Step’ methods and Cufflinks missed two of the four validated ‘1-Step’ models.** Labels for ‘Method’ and number of models denoted the same as Supplementary Table 27. For those methods shown in Supplementary Table 27 but not here, none of them has any gene model overlapping with the four validated gene models. None of ‘2-Step’ or Cufflinks models overlapped with CUFFm.chr17.20196 or CUFFp.chr12.15498.

| Method                | CUFFm.chr12.33668 | CUFFm.chr17.20196 | CUFFp.chr10.20259 | CUFFp.chr12.15498 |
|-----------------------|-------------------|-------------------|-------------------|-------------------|
| Cufflinks + Cuffmerge | 1                 | 0                 | 1                 | 0                 |
| ENCSR000CHS.Rep1      | 1                 | 0                 | 0                 | 0                 |
| ENCSR000CHT.Rep1      | 1                 | 0                 | 0                 | 0                 |
| ENCSR558PXY.Rep1      | 1                 | 0                 | 0                 | 0                 |
| ENCSR558PXY.Rep2      | 1                 | 0                 | 0                 | 0                 |
| ENCSR661TLW.Rep1      | 1                 | 0                 | 0                 | 0                 |
| ENCSR661TLW.Rep2      | 1                 | 0                 | 0                 | 0                 |
| ENCSR826IXR.Rep1      | 1                 | 0                 | 0                 | 0                 |
| ENCSR826IXR.Rep2      | 1                 | 0                 | 0                 | 0                 |

**Supplementary Table 29. Protein-coding potential of PRAM mouse transcripts.** Listed are the top ten mammalian proteins that PRAM mouse transcripts aligned to by blastx. Proteins were ranked by E-value and the fraction of aligned protein segment length over protein's total length. Blastx searches were carried out in the same way as in Supplementary Table 16. CUFFm.chr12.33668.1 had only one matched protein. CUFFm.chr13.33668.2 and CUFFp.chr12.15498.2 had 31 and 165 matched proteins, respectively.

| aligned transcript  |        |       |      | aligned protein |                                            |                               |          |          |        |       |     |
|---------------------|--------|-------|------|-----------------|--------------------------------------------|-------------------------------|----------|----------|--------|-------|-----|
| ID                  | length | start | end  | ID              | name                                       | species                       | E-value  | fraction | length | start | end |
| CUFFm.chr12.33668.1 | 9047   | 4534  | 4737 | EDL09413        | mCG147326                                  | <i>Mus musculus</i>           | 8.41E-21 | 0.821    | 84     | 16    | 84  |
| CUFFm.chr12.33668.2 | 7944   | 1770  | 2168 | EDL29766        | mCG148020                                  | <i>Mus musculus</i>           | 9.06E-56 | 0.950    | 140    | 1     | 133 |
|                     |        | 1854  | 2246 | EDL14187        | mCG147486                                  | <i>Mus musculus</i>           | 1.34E-50 | 1.000    | 132    | 1     | 132 |
|                     |        | 1770  | 2105 | CAA37650        | ORF7                                       | <i>Rattus norvegicus</i>      | 1.46E-50 | 1.000    | 112    | 1     | 112 |
|                     |        | 4230  | 4796 | CAA29034        | ORF1                                       | <i>Rattus norvegicus</i>      | 1.04E-48 | 0.995    | 189    | 1     | 188 |
|                     |        | 1854  | 2168 | BAE33613        | unnamed protein product                    | <i>Mus musculus</i>           | 2.33E-48 | 0.827    | 127    | 1     | 105 |
|                     |        | 1770  | 2105 | ACT99045        | unknown                                    | <i>Rattus norvegicus</i>      | 7.65E-48 | 1.000    | 112    | 1     | 112 |
|                     |        | 1770  | 2072 | EDL11227        | mCG133245, isoform CRA_a                   | <i>Mus musculus</i>           | 5.78E-37 | 0.990    | 102    | 1     | 101 |
|                     |        | 1770  | 2087 | BAC29583        | unnamed protein product                    | <i>Mus musculus</i>           | 1.55E-36 | 0.841    | 126    | 1     | 106 |
|                     |        | 3021  | 3431 | EDK98251        | mCG146853                                  | <i>Mus musculus</i>           | 4.73E-35 | 0.915    | 153    | 14    | 153 |
|                     |        | 3099  | 3602 | EFB21087        | hypothetical protein PANDA_017931, partial | <i>Ailuropoda melanoleuca</i> | 2.70E-34 | 1.000    | 171    | 1     | 171 |
| CUFFp.chr12.15498.2 | 6380   | 2774  | 4192 | EDL78838        | rCG59047, partial                          | <i>Rattus norvegicus</i>      | 0        | 0.996    | 475    | 3     | 475 |
|                     |        | 2774  | 4192 | EDL95042        | rCG20251, partial                          | <i>Rattus norvegicus</i>      | 0        | 0.996    | 475    | 3     | 475 |
|                     |        | 3545  | 5479 | CAA43592        | unnamed protein product, partial           | <i>Rattus norvegicus</i>      | 0        | 0.946    | 685    | 1     | 648 |
|                     |        | 3914  | 5479 | CAA37646        | ORF3                                       | <i>Rattus norvegicus</i>      | 0        | 0.944    | 556    | 2     | 526 |
|                     |        | 3641  | 5479 | EDM13183        | rCG47246, partial                          | <i>Rattus norvegicus</i>      | 0        | 0.943    | 653    | 1     | 616 |
|                     |        | 2780  | 4192 | CAA43595        | unnamed protein product, partial           | <i>Rattus norvegicus</i>      | 0        | 0.942    | 500    | 30    | 500 |
|                     |        | 2729  | 4036 | CAA27363        | unnamed protein product, partial           | <i>Mus musculus</i>           | 0        | 0.936    | 466    | 12    | 447 |
|                     |        | 2777  | 5479 | ELR58510        | hypothetical protein M91_05513, partial    | <i>Bos mutus</i>              | 0        | 0.772    | 1170   | 3     | 905 |
|                     |        | 4067  | 5326 | EDL78640        | rCG65853                                   | <i>Rattus norvegicus</i>      | 0        | 0.766    | 552    | 130   | 552 |
|                     |        | 2777  | 5479 | ELR51705        | hypothetical protein M91_10420, partial    | <i>Bos mutus</i>              | 0        | 0.766    | 1179   | 3     | 905 |

**Supplementary Table 30. ENCODE K562 RNA-seq datasets.** All the datasets are strand-specific and paired-end. To avoid bias, we required that data were from untreated K562 cells and were not from subcellular fractions, such as membrane, nucleus, cytosol, etc. We included all of the data sets labeled as RNA-seq or poly(A) mRNA RNA-seq so that we could pool a large collection of K562 samples.

| Accession <sup>1</sup> | Assay                | FASTQ ID <sup>1</sup> | Biological replicate index | Mate index |
|------------------------|----------------------|-----------------------|----------------------------|------------|
| ENCSR000AEL            | RNA-seq              | ENCFF001RFF           | 1                          | 1          |
| ENCSR000AEL            | RNA-seq              | ENCFF001RFE           | 1                          | 2          |
| ENCSR000AEL            | RNA-seq              | ENCFF001RFD           | 2                          | 1          |
| ENCSR000AEL            | RNA-seq              | ENCFF001RFC           | 2                          | 2          |
| ENCSR000AEM            | poly(A) mRNA RNA-seq | ENCFF001RED           | 1                          | 1          |
| ENCSR000AEM            | poly(A) mRNA RNA-seq | ENCFF001RDZ           | 1                          | 2          |
| ENCSR000AEM            | poly(A) mRNA RNA-seq | ENCFF001REG           | 2                          | 1          |
| ENCSR000AEM            | poly(A) mRNA RNA-seq | ENCFF001REF           | 2                          | 2          |
| ENCSR000AEN            | RNA-seq              | ENCFF001RDC           | 1                          | 1          |
| ENCSR000AEN            | RNA-seq              | ENCFF001RCU           | 1                          | 2          |
| ENCSR000AEN            | RNA-seq              | ENCFF001RDB           | 2                          | 1          |
| ENCSR000AEN            | RNA-seq              | ENCFF001RCT           | 2                          | 2          |
| ENCSR000AEO            | poly(A) mRNA RNA-seq | ENCFF001RDE           | 1                          | 1          |
| ENCSR000AEO            | poly(A) mRNA RNA-seq | ENCFF001RCW           | 1                          | 2          |
| ENCSR000AEO            | poly(A) mRNA RNA-seq | ENCFF001RDD           | 2                          | 1          |
| ENCSR000AEO            | poly(A) mRNA RNA-seq | ENCFF001RCV           | 2                          | 2          |
| ENCSR000AEP            | RNA-seq              | ENCFF001RVV           | 1                          | 1          |
| ENCSR000AEP            | RNA-seq              | ENCFF001RWA           | 1                          | 2          |
| ENCSR000AEP            | RNA-seq              | ENCFF001RWD           | 2                          | 1          |
| ENCSR000AEP            | RNA-seq              | ENCFF001RVU           | 2                          | 2          |
| ENCSR000AEQ            | poly(A) mRNA RNA-seq | ENCFF001RWF           | 1                          | 1          |
| ENCSR000AEQ            | poly(A) mRNA RNA-seq | ENCFF001RWC           | 1                          | 2          |
| ENCSR000AEQ            | poly(A) mRNA RNA-seq | ENCFF001RWE           | 2                          | 1          |
| ENCSR000AEQ            | poly(A) mRNA RNA-seq | ENCFF001RWG           | 2                          | 2          |
| ENCSR000CPH            | poly(A) mRNA RNA-seq | ENCFF000HFF           | 1                          | 1          |
| ENCSR000CPH            | poly(A) mRNA RNA-seq | ENCFF000HFG           | 1                          | 2          |
| ENCSR000CPH            | poly(A) mRNA RNA-seq | ENCFF000HFH           | 2                          | 1          |
| ENCSR000CPH            | poly(A) mRNA RNA-seq | ENCFF000HFX           | 2                          | 2          |
| ENCSR000EYO            | poly(A) mRNA RNA-seq | ENCFF000DWT           | 1                          | 1          |
| ENCSR000EYO            | poly(A) mRNA RNA-seq | ENCFF000DWW           | 1                          | 1          |
| ENCSR000EYO            | poly(A) mRNA RNA-seq | ENCFF000DWV           | 1                          | 1          |
| ENCSR000EYO            | poly(A) mRNA RNA-seq | ENCFF000DWU           | 1                          | 1          |
| ENCSR000EYO            | poly(A) mRNA RNA-seq | ENCFF000DWX           | 1                          | 1          |
| ENCSR000EYO            | poly(A) mRNA RNA-seq | ENCFF000DXL           | 1                          | 2          |
| ENCSR000EYO            | poly(A) mRNA RNA-seq | ENCFF000DXM           | 1                          | 2          |
| ENCSR000EYO            | poly(A) mRNA RNA-seq | ENCFF000DXN           | 1                          | 2          |
| ENCSR000EYO            | poly(A) mRNA RNA-seq | ENCFF000DXP           | 1                          | 2          |
| ENCSR000EYO            | poly(A) mRNA RNA-seq | ENCFF000DXO           | 1                          | 2          |
| ENCSR000EYO            | poly(A) mRNA RNA-seq | ENCFF000DXC           | 2                          | 1          |
| ENCSR000EYO            | poly(A) mRNA RNA-seq | ENCFF000DXF           | 2                          | 1          |
| ENCSR000EYO            | poly(A) mRNA RNA-seq | ENCFF000DXD           | 2                          | 1          |



|             |                      |             |   |   |
|-------------|----------------------|-------------|---|---|
| ENCSR000EYO | poly(A) mRNA RNA-seq | ENCFF000DXE | 2 | 1 |
| ENCSR000EYO | poly(A) mRNA RNA-seq | ENCFF000DXU | 2 | 2 |
| ENCSR000EYO | poly(A) mRNA RNA-seq | ENCFF000DXW | 2 | 2 |
| ENCSR000EYO | poly(A) mRNA RNA-seq | ENCFF000DXV | 2 | 2 |
| ENCSR000EYO | poly(A) mRNA RNA-seq | ENCFF000DXX | 2 | 2 |
| ENCSR109IQO | RNA-seq              | ENCFF002DKA | 1 | 1 |
| ENCSR109IQO | RNA-seq              | ENCFF002DKE | 1 | 2 |
| ENCSR109IQO | RNA-seq              | ENCFF002DKF | 2 | 1 |
| ENCSR109IQO | RNA-seq              | ENCFF002DKI | 2 | 2 |
| ENCSR545DKY | poly(A) mRNA RNA-seq | ENCFF059IUV | 1 | 1 |
| ENCSR545DKY | poly(A) mRNA RNA-seq | ENCFF104ZSG | 1 | 2 |
| ENCSR545DKY | poly(A) mRNA RNA-seq | ENCFF628GUZ | 2 | 1 |
| ENCSR545DKY | poly(A) mRNA RNA-seq | ENCFF695XOC | 2 | 2 |
| ENCSR885DVH | RNA-seq              | ENCFF267RKD | 1 | 1 |
| ENCSR885DVH | RNA-seq              | ENCFF455VYN | 1 | 2 |
| ENCSR885DVH | RNA-seq              | ENCFF606ZTR | 2 | 1 |
| ENCSR885DVH | RNA-seq              | ENCFF444KCV | 2 | 2 |

<sup>1</sup>ENCODE RNA-seq experiment and file accession ID (<https://www.encodeproject.org>)

**Supplementary Table 31. Protein-coding potential of PRAM mouse transcript's human counterpart.**

Listed are the top ten mammalian proteins that CUFFm.chr7.6148.1 aligned to by blastx. Proteins were ranked by E-value and the fraction of aligned protein segment length over protein's total length. Blastx searches were carried out in the same way as in Supplementary Table 16. CUFFm.chr7.6148.1 had sixteen matched proteins.

| aligned transcript |        |       |      | aligned protein |                                         |                            |          |          |        |       |     |
|--------------------|--------|-------|------|-----------------|-----------------------------------------|----------------------------|----------|----------|--------|-------|-----|
| ID                 | length | start | end  | ID              | name                                    | species                    | E-value  | fraction | length | start | end |
| CUFFm.chr7.6148.1  | 6176   | 1006  | 1221 | EGM_09670       | hypothetical protein EGM_09670, partial | <i>Macaca fascicularis</i> | 3.81E-25 | 0.81     | 89     | 17    | 88  |
|                    |        | 1006  | 1221 | EAX05977        | hCG2038848, partial                     | <i>Homo sapiens</i>        | 1.14E-24 | 0.83     | 87     | 14    | 85  |
|                    |        | 972   | 1247 | EGM_18285       | hypothetical protein EGM_18285, partial | <i>Macaca fascicularis</i> | 1.23E-21 | 0.92     | 93     | 8     | 93  |
|                    |        | 5734  | 5949 | EGK_00471       | hypothetical protein EGK_00471, partial | <i>Macaca mulatta</i>      | 3.13E-20 | 0.95     | 77     | 4     | 76  |
|                    |        | 5737  | 5952 | EGK_05340       | hypothetical protein EGK_05340, partial | <i>Macaca mulatta</i>      | 2.43E-18 | 0.76     | 93     | 1     | 71  |
|                    |        | 990   | 1247 | EGK_05340       | hypothetical protein EGK_05340, partial | <i>Macaca mulatta</i>      | 3.66E-18 | 0.97     | 93     | 4     | 93  |
|                    |        | 5737  | 5952 | EGK_04905       | hypothetical protein EGK_04905, partial | <i>Macaca mulatta</i>      | 4.35E-18 | 0.80     | 88     | 1     | 70  |
|                    |        | 5737  | 5952 | EGM_09562       | hypothetical protein EGM_09562, partial | <i>Macaca fascicularis</i> | 1.77E-17 | 0.82     | 87     | 1     | 71  |
|                    |        | 5734  | 5952 | EGM_17921       | hypothetical protein EGM_17921, partial | <i>Macaca fascicularis</i> | 3.89E-17 | 0.81     | 88     | 6     | 76  |
|                    |        | 5737  | 5952 | EGK_10551       | hypothetical protein EGK_10551, partial | <i>Macaca mulatta</i>      | 4.01E-17 | 0.93     | 75     | 2     | 71  |

**Supplementary Table 32. GATA2 and TAL1 human ChIP-seq datasets.**

| Accession <sup>1</sup> | Cell                                                             | Treatment | Antibody | Alias                     |
|------------------------|------------------------------------------------------------------|-----------|----------|---------------------------|
| GSE60792               | Erythroid progenitors derived from human CD34+ bone marrow cells | DMSO      | GATA2    | CD34ace_GATA2_DMSO_Rep1   |
|                        |                                                                  | ACY-957   |          | CD34ace_GATA2_ACY957_Rep1 |
| GSE45144               | CD34+ Human Blood Stem/Progenitor Cells                          | None      | SCL      | CD34uns_TAL1_Rep1         |
|                        |                                                                  |           | GATA2    | CD34uns_GATA2_Rep1        |
|                        |                                                                  |           | IgG      | CD34uns_Input_Rep1        |
| GSE29194               | CD34+ progenitors                                                | BMP       | GATA2    | CD34chb_GATA2_BMP_Rep1    |
|                        |                                                                  |           | WCE      | CD34chb_Input_BMP_Rep1    |
| GSE31477               | HUVEC                                                            | None      | GATA2    | HUVEC_GATA2_Rep1          |
|                        |                                                                  |           |          | HUVEC_GATA2_Rep2          |
|                        |                                                                  |           | Input    | HUVEC_Input_Rep1          |
|                        | K562                                                             | None      | GATA2    | K562usc_GATA2_Rep1        |
|                        |                                                                  |           |          | K562usc_GATA2_Rep2        |
|                        |                                                                  |           | Input    | K562usc_Input_Rep1        |
|                        | SH-SY5Y                                                          | None      | GATA2    | SHSY5Y_GATA2_Rep1         |
|                        |                                                                  |           |          | SHSY5Y_GATA2_Rep2         |
|                        |                                                                  |           | Input    | SHSY5Y_Input_Rep1         |
|                        | K562                                                             | None      | TAL1     | K562sta_TAL1_Rep1         |
|                        |                                                                  |           |          | K562sta_TAL1_Rep2         |
|                        |                                                                  |           | Input    | K562sta_Input_Rep1        |
|                        |                                                                  |           |          | K562sta_Input_Rep2        |
| GSE31363               | K562                                                             | None      | GATA2    | K562uch_GATA2_Rep1        |
|                        |                                                                  |           |          | K562uch_GATA2_Rep2        |
|                        |                                                                  |           | Input    | K562uch_Input_Rep1        |
| GSE32465               | K562                                                             | None      | GATA2    | K562hai_GATA2_Rep1        |
|                        |                                                                  |           |          | K562hai_GATA2_Rep2        |
|                        |                                                                  |           | Input    | K562hai_Input_Rep1        |
|                        |                                                                  |           |          | K562hai_Input_Rep2        |
|                        |                                                                  |           |          | K562hai_Input_Rep3        |
|                        |                                                                  |           |          | K562hai_Input_Rep4        |

<sup>1</sup>Accession ID for Gene Expression Omnibus (<https://www.ncbi.nlm.nih.gov/geo/>)

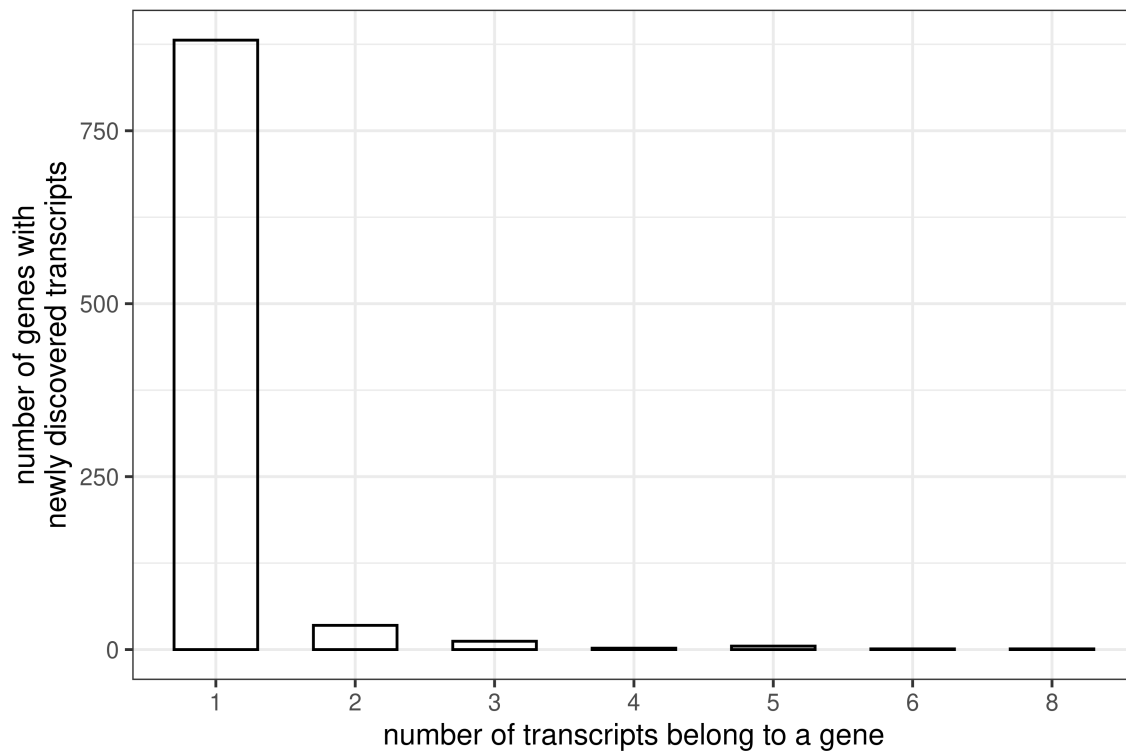

**Supplementary Figure 1. Distribution of genes with ‘newly discovered’ transcripts.** Genes were stratified by their number of ‘newly discovered’ transcripts. ‘Newly discovered’ genes were those that existed in GENCODE version 24, but not in GENCODE version 20. As described later in the manuscript, ‘newly discovered’ genes share similar features with intergenic transcripts. 94% of the genes (881 of 937) contain only one newly discovered transcripts. This high percentage suggested that the single-transcript genes we used in the benchmark dataset are representative for the intergenic transcripts we aimed to predict.

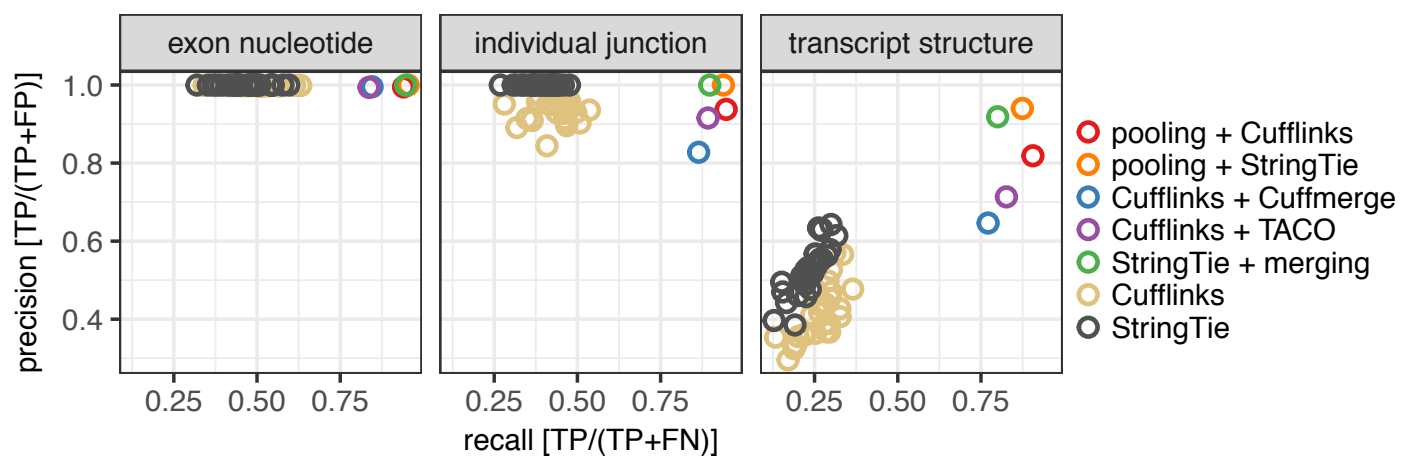

**Supplementary Figure 2. Benchmark results of Cufflinks, StringTie, ‘1-Step’ and ‘2-Step’ methods.**

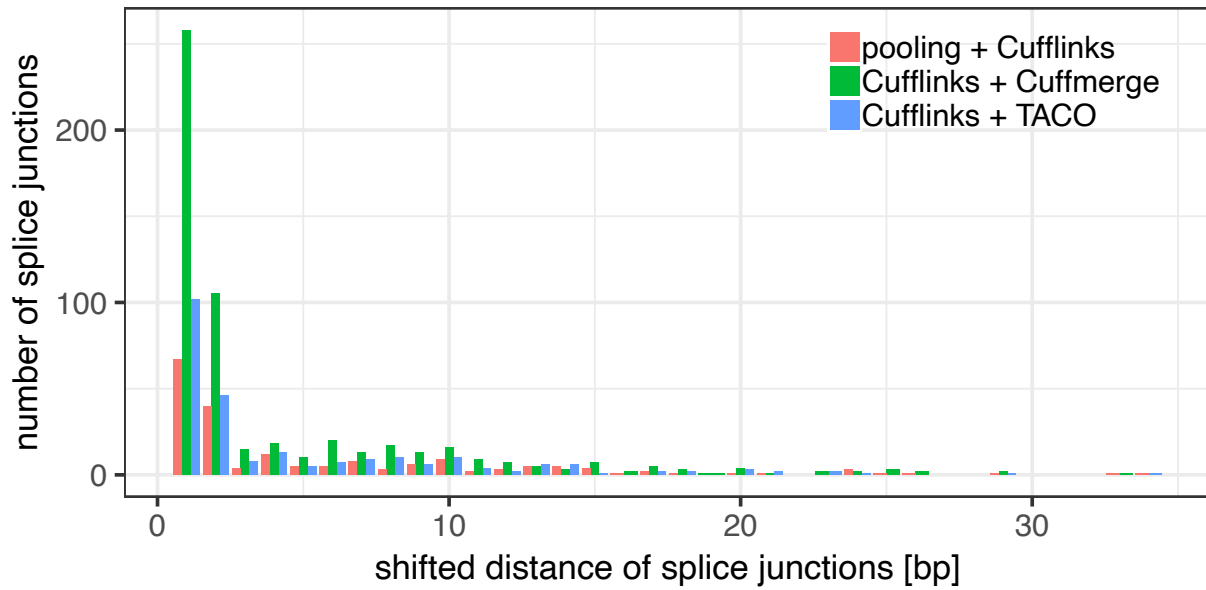

**Supplementary Figure 3. Distribution of shift for false positive junctions by Cufflinks-based methods.** False positive junctions shown here are those with both 5'- and 3'-splice sites shifted by the same number of base pairs compared to the benchmark transcripts.

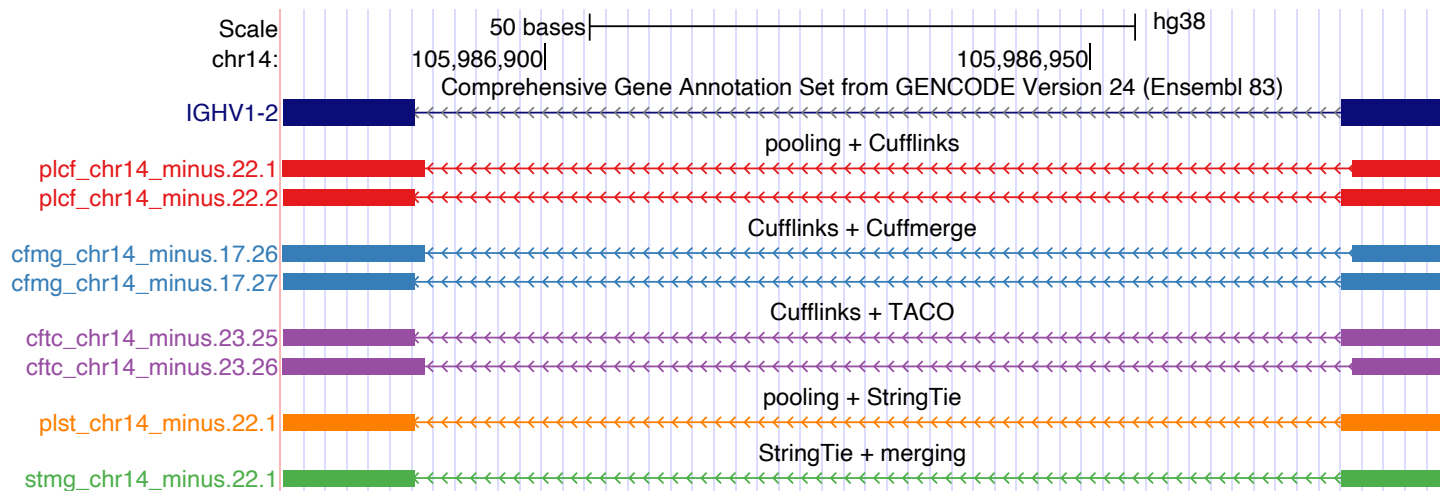

**Supplementary Figure 4. An example of shifted 5'- and 3'-splice sites by Cufflinks-based methods.** For reconstructing transcript *IGHV1-2*, 'pooling+ Cufflinks', 'Cufflinks + Cuffmerge', and 'Cufflinks + TACO' built models (plcf\_chr14\_minus.22.1, cfmg\_chr14\_minus.17.26, cftc\_chr14\_minus.23.26) containing false positive splice junctions, where 5'- and 3'-splice sites were shifted by one base pair.

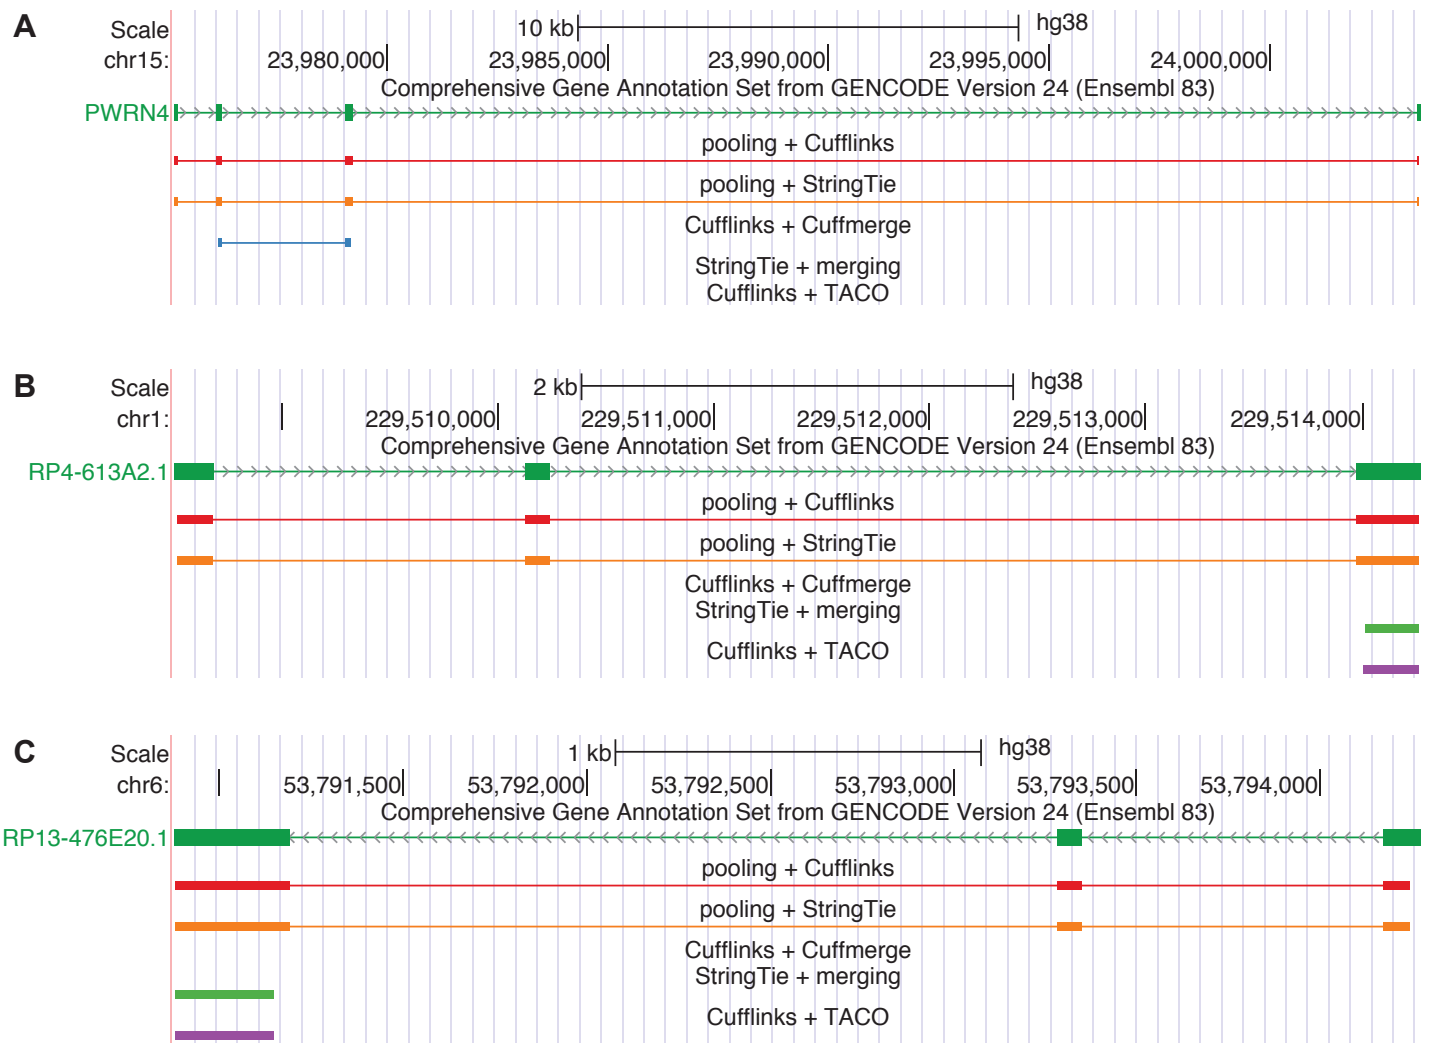

**Supplementary Figure 5. Transcript structures missed by '2-Step', but predicted by '1-Step' methods.**  
The definition of 'predicted' and 'missed' transcript structures are the same as Supplementary Table 3.



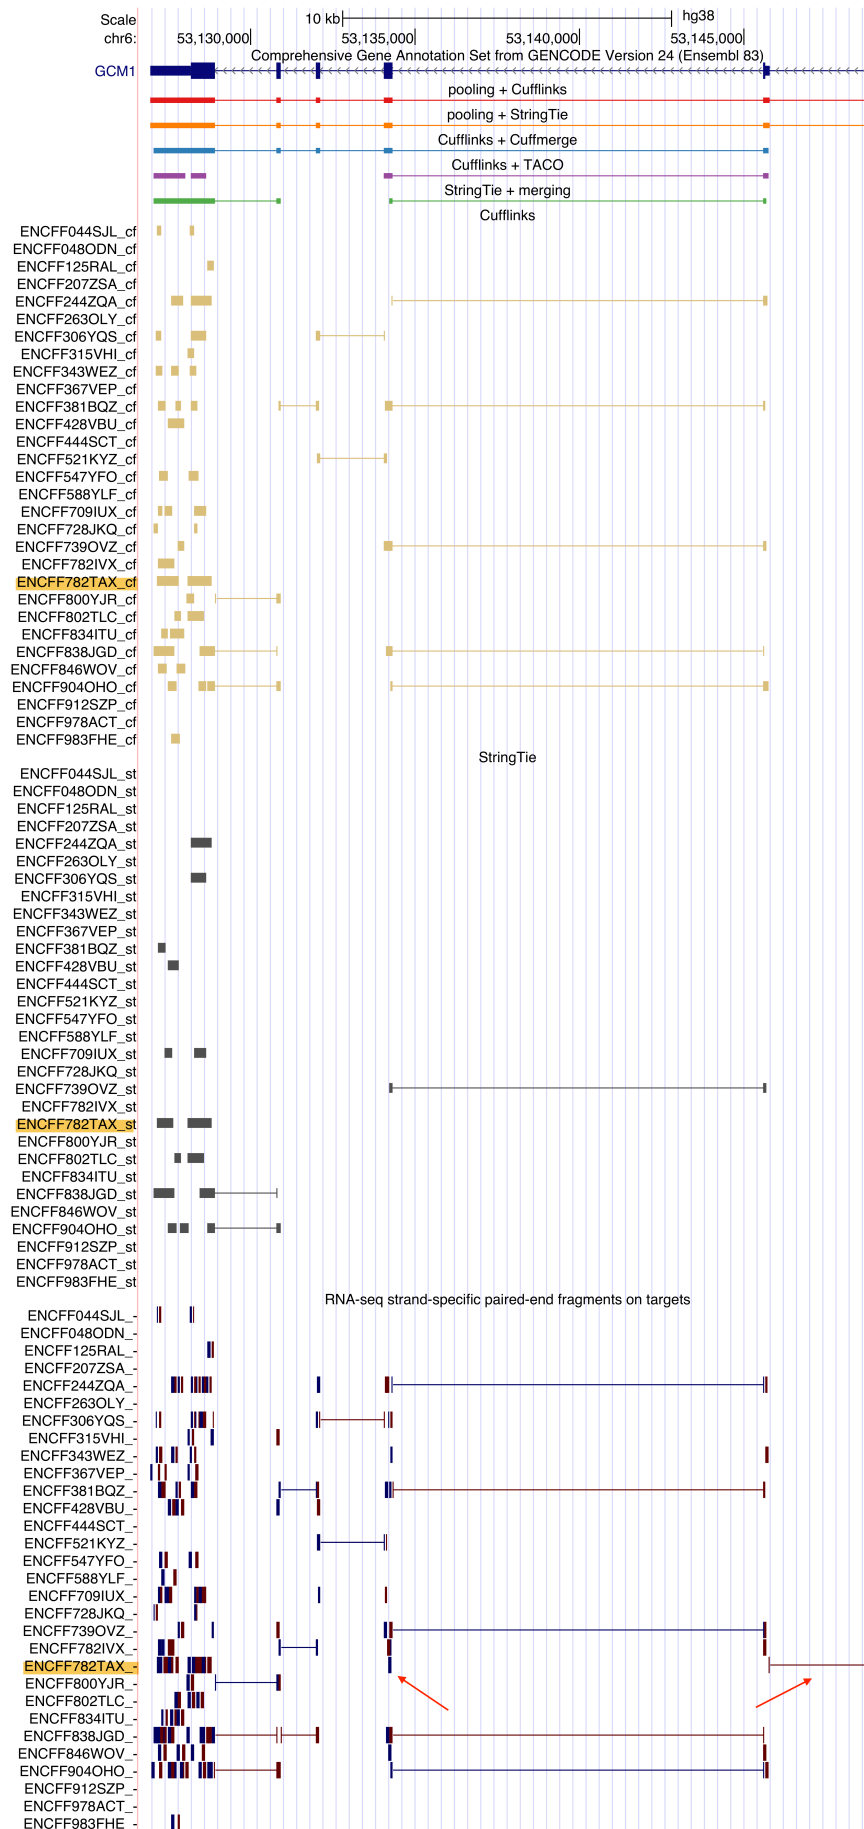

**Supplementary Figure 6. Input alignments from the 30 RNA-seq datasets for *GCM1*.** ENCFF782TAX was the only RNA-seq dataset that contained a fragment for *GCM1*'s first splice junction. The two mates of this fragment are labelled by red arrows. Track names for transcript models built by Cufflinks and StringTie based on ENCFF782TAX and track name for ENCFF782TAX RNA-seq alignments are highlighted in yellow.

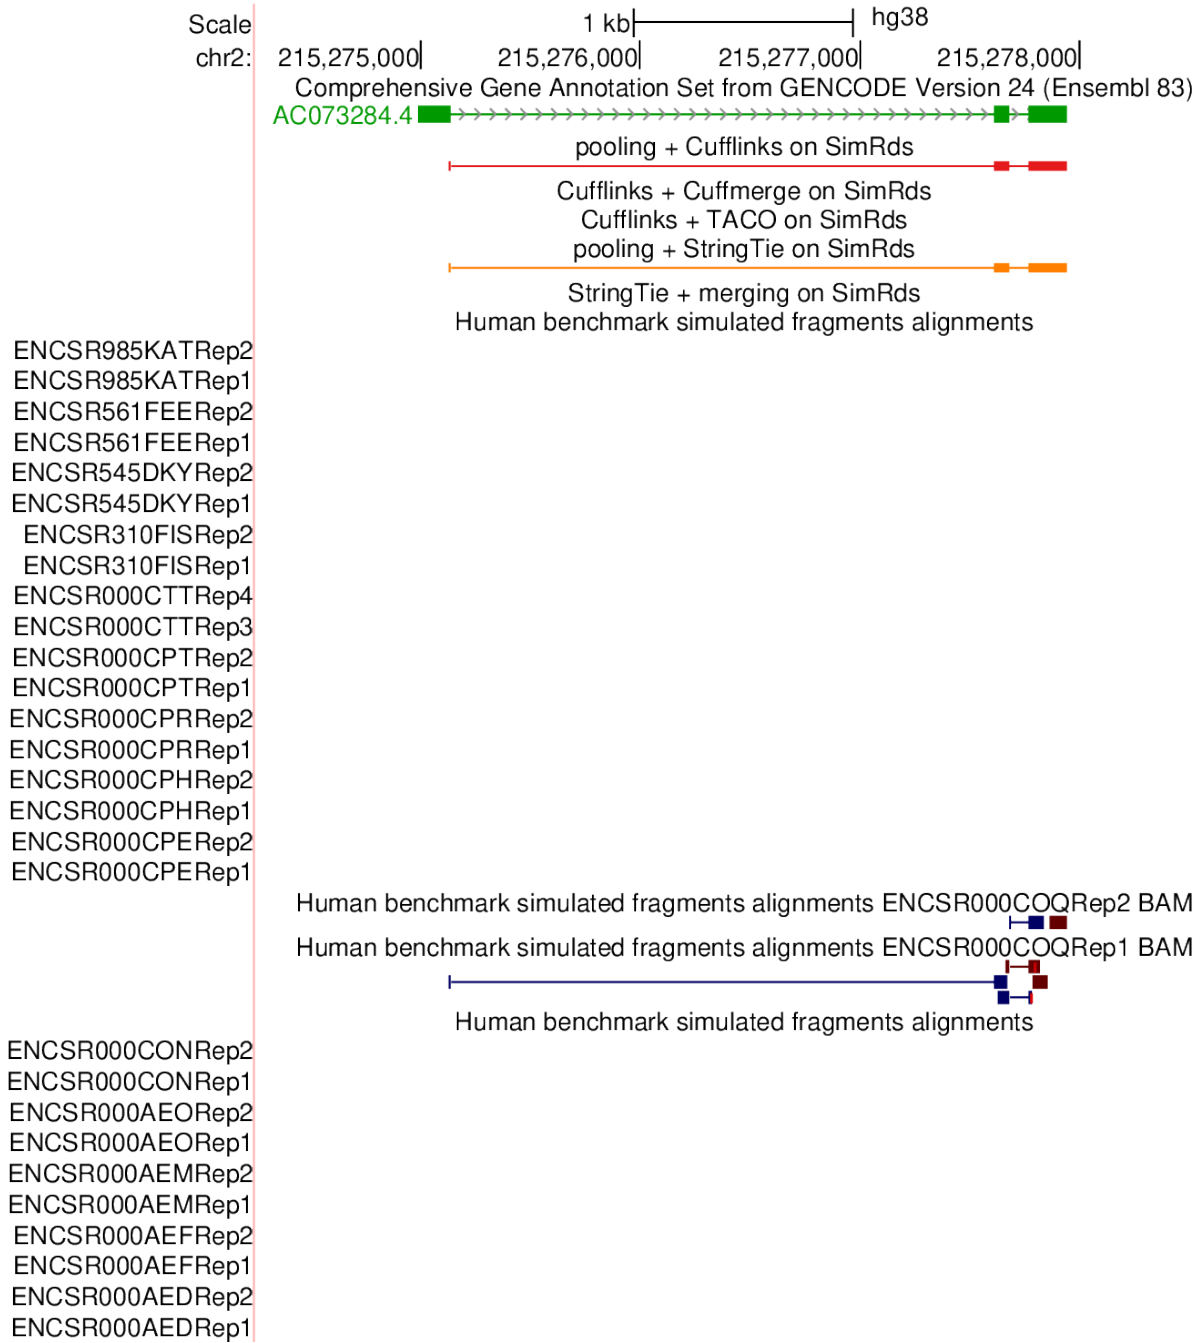

**Supplementary Figure 7. UCSC Genome Browser screenshot of a benchmark transcript that had transcript structure predicted by both ‘1-Step’ methods and missed by all three ‘2-Step’ methods on simulated RNA-seq fragments.** Shown are GENCODE annotation of transcript AC073284.4, predictions from ‘1-Step’ and ‘2-Step’ methods, and simulated RNA-seq fragments that served as the input.

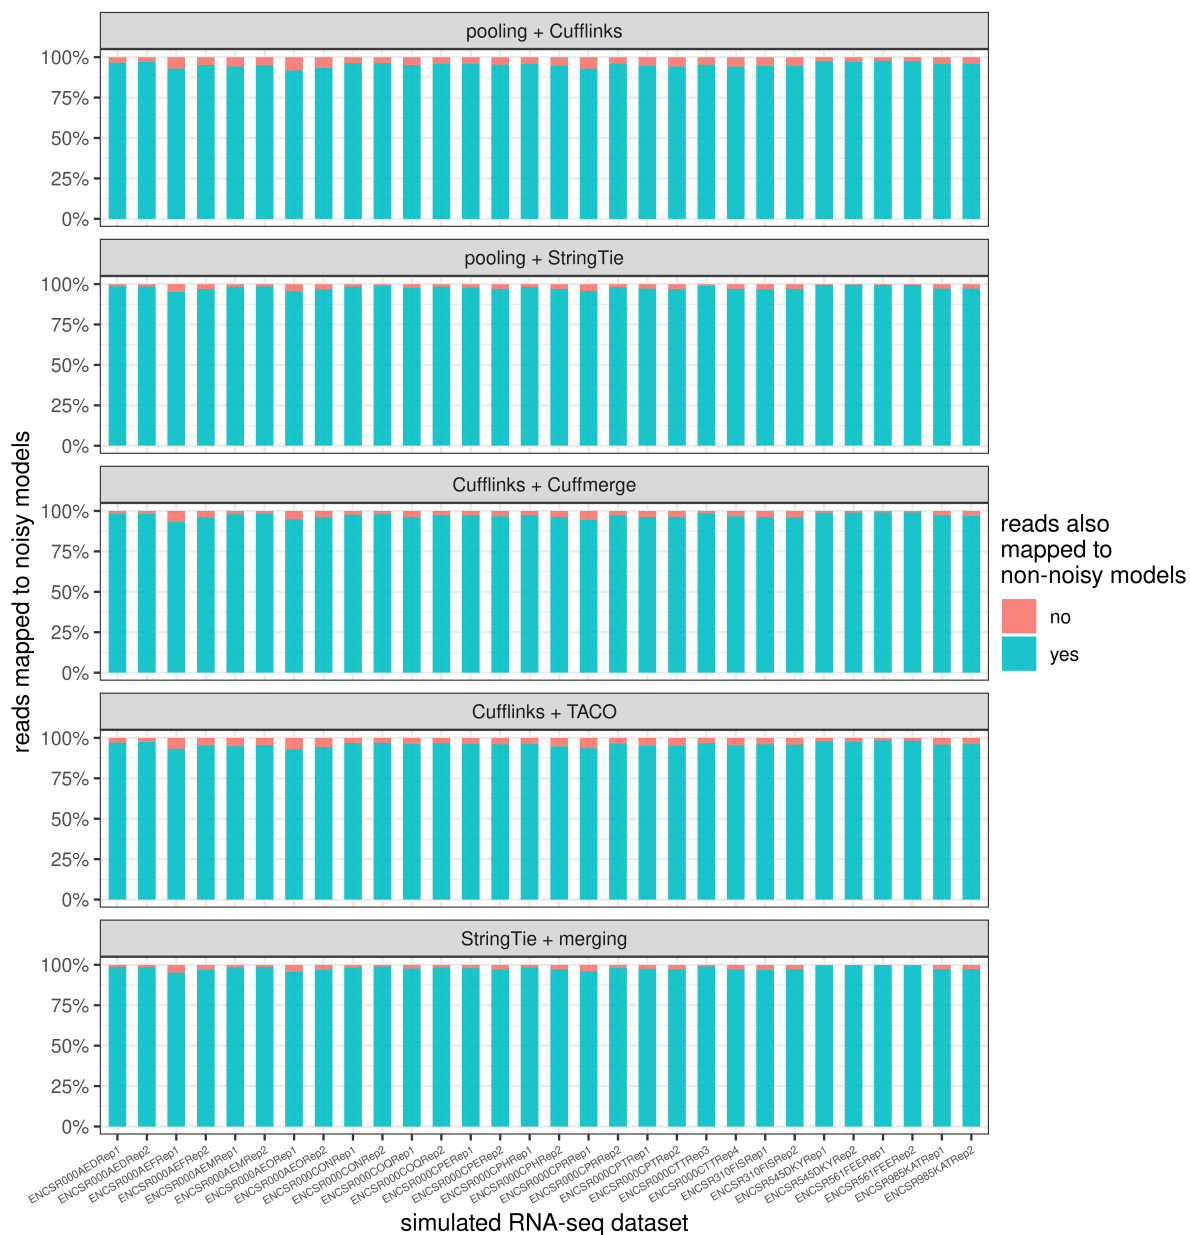

**Supplementary Figure 8. Percentage of simulated RNA-seq reads that mapped to noisy models and were shared by 'non-noisy' models.** Cyan bars depicts the percentage of reads that mapped to noisy models and were also shared by the 'non-noisy' models.

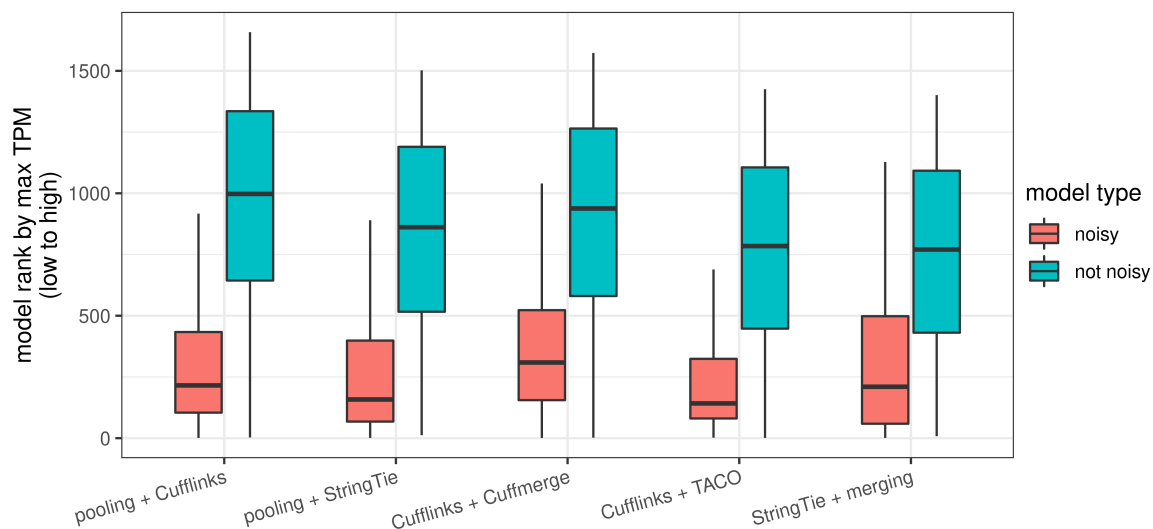

**Supplementary Figure 9. Comparison of expression levels for noisy and correctly detected transcript models.** Expression level was defined as the maximum TPM from the 30 simulated RNA-seq datasets. Models were ranked by their maximum TPM from low to high. A smaller ranking number indicates a lower expression level.

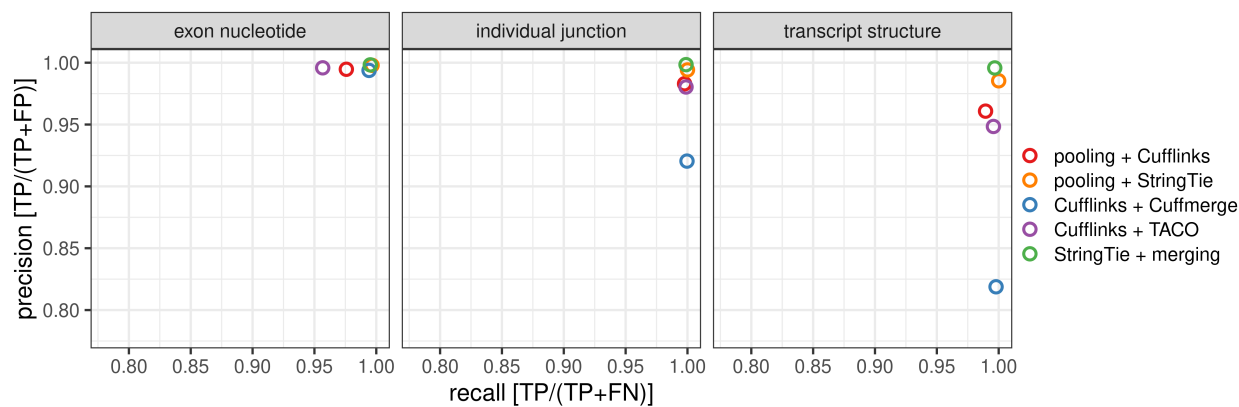

**Supplementary Figure 10. Comparison of 1-Step and 2-Step methods on simulated RNA-seq fragments based on parameters learned from the 30 ENCODE datasets.** Target transcripts with predicted models from all of the five methods are set as the gold standard. Target transcripts that shared an overlapping predicted model with another target transcript were excluded from evaluation. Predicted models with a single exon, a genomic span < 200bp, or not overlapping any target transcript were excluded from evaluation.

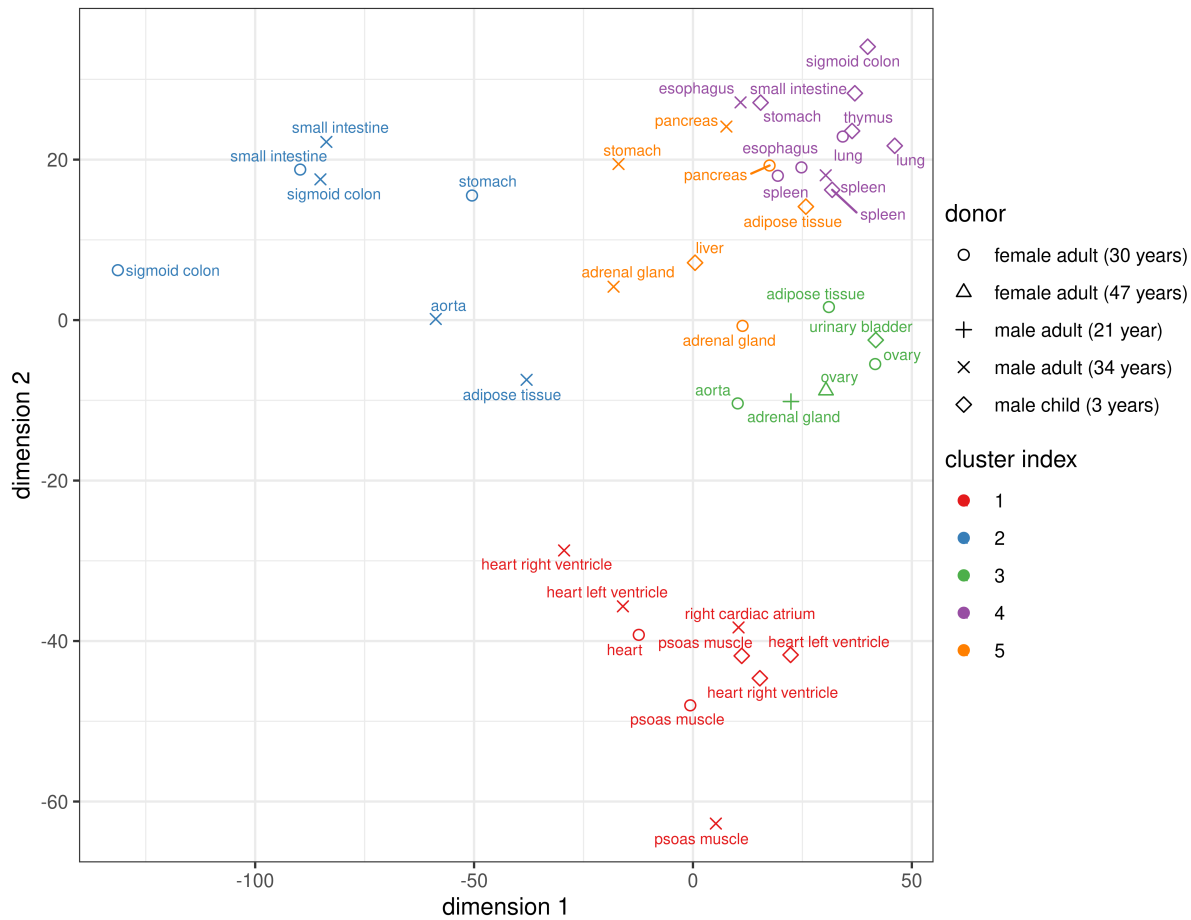

**Supplementary Figure 11. 40 ENCODE RNA-seq datasets were grouped into five clusters by K-means clustering.** Tissues were clustered based on expression profiles of protein-coding genes and projected on to two dimensions by multidimensional scaling of their  $\log_{10}(FPKM)$ . FPKM values of the genes were added by a constant  $10^{-3}$  to avoid taking logarithm of zero.

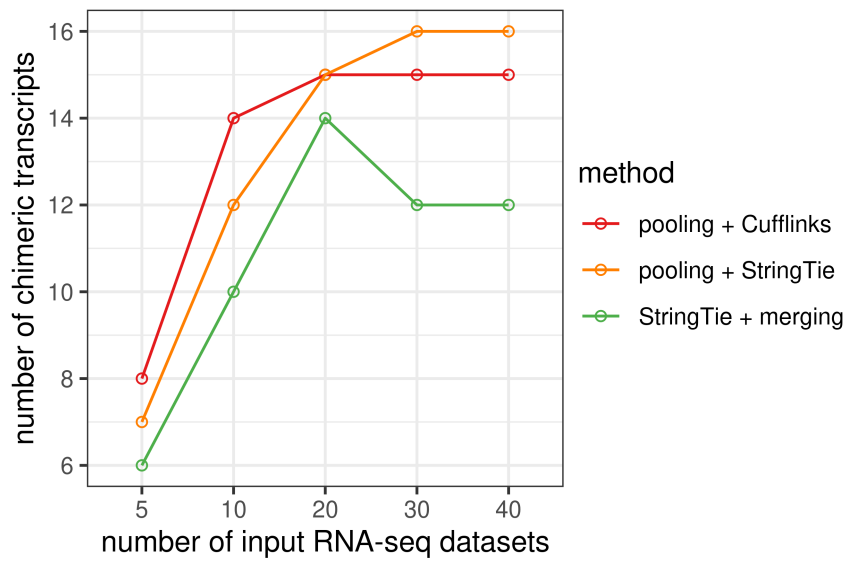

**Supplementary Figure 12. Number of predicted chimeric transcripts by ‘1-Step’ and ‘2-Step’ methods using different number of input RNA-seq datasets.** The dashed line indicates the number of loci that could give rise to chimeric transcripts.

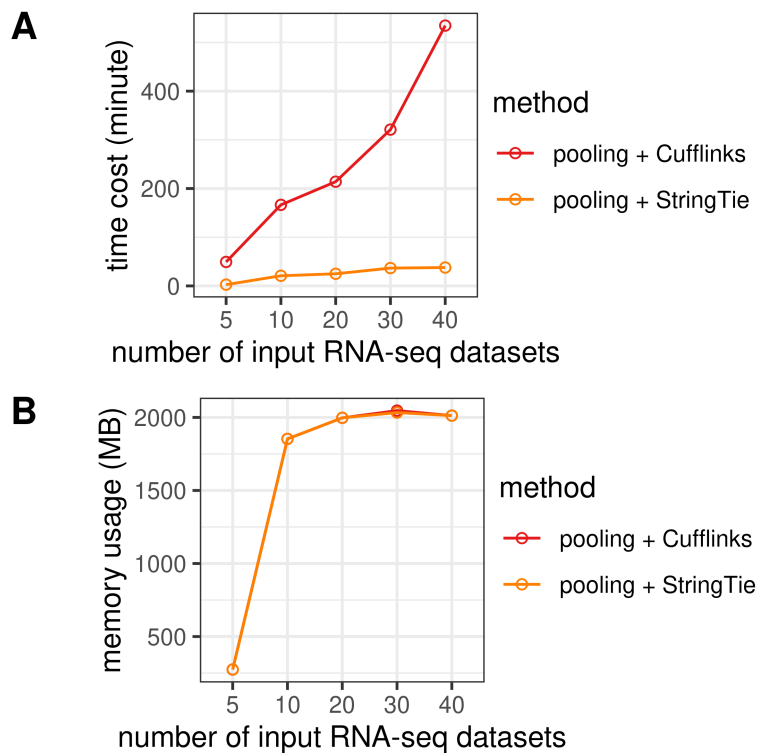

**Supplementary Figure 13. Computing time and memory usage for ‘1-Step’ method predictions on different number of input RNA-seq datasets.** Predictions were made on one-transcript genes ran on 2.1 GHz AMD CPUs using eight threads.



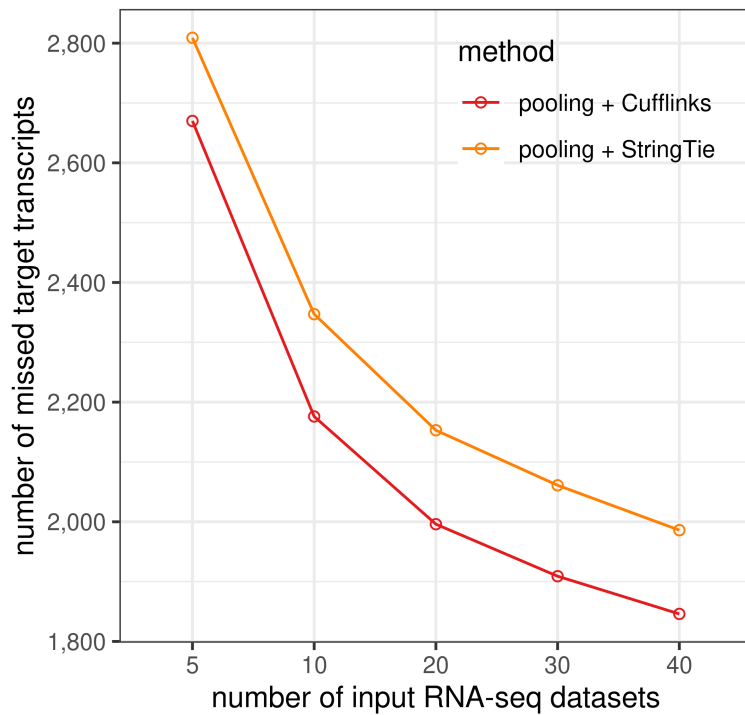

**Supplementary Figure 14. Number of target transcripts not detected by ‘1-Step’ methods under different number of input RNA-seq datasets.** Whether or not a target transcript was detected by a given methods is based on the whether or not any of the predicted transcript models overlapped the genomic span of the target transcript.

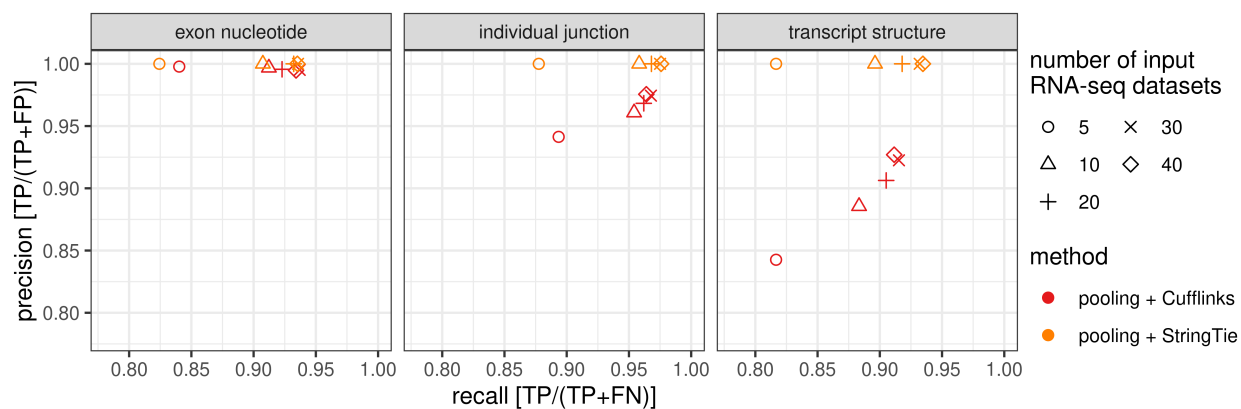

**Supplementary Figure 15. Precision and recall on the 780 target transcripts with predicted models under all combinations of the five different numbers of input RNA-seq datasets and two ‘1-Step’ methods.**

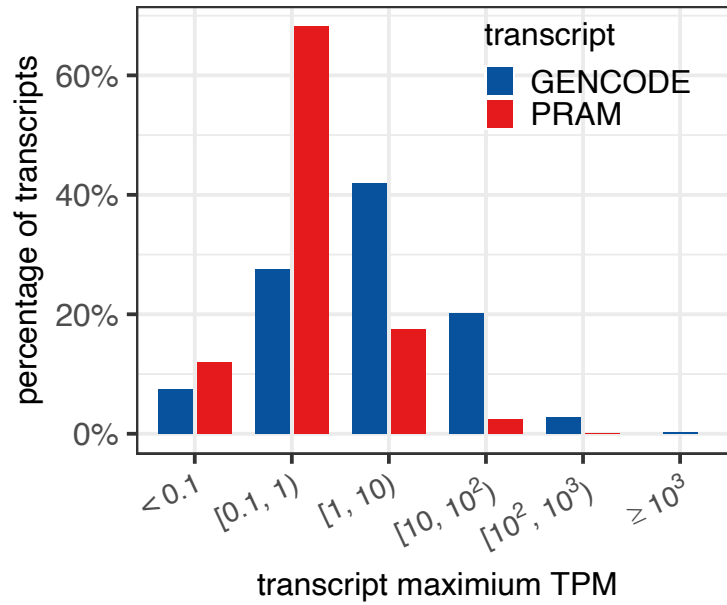

**Supplementary Figure 16. Distribution of GENCODE and PRAM transcripts by their maximum TPMs.** A transcript's final TPM was defined as its maximum TPM across all the 30 RNA-seq datasets (Supplementary Table 1). Transcripts with single exon, genomic span  $< 200$  bp, or maximum TPM as 0 were excluded.

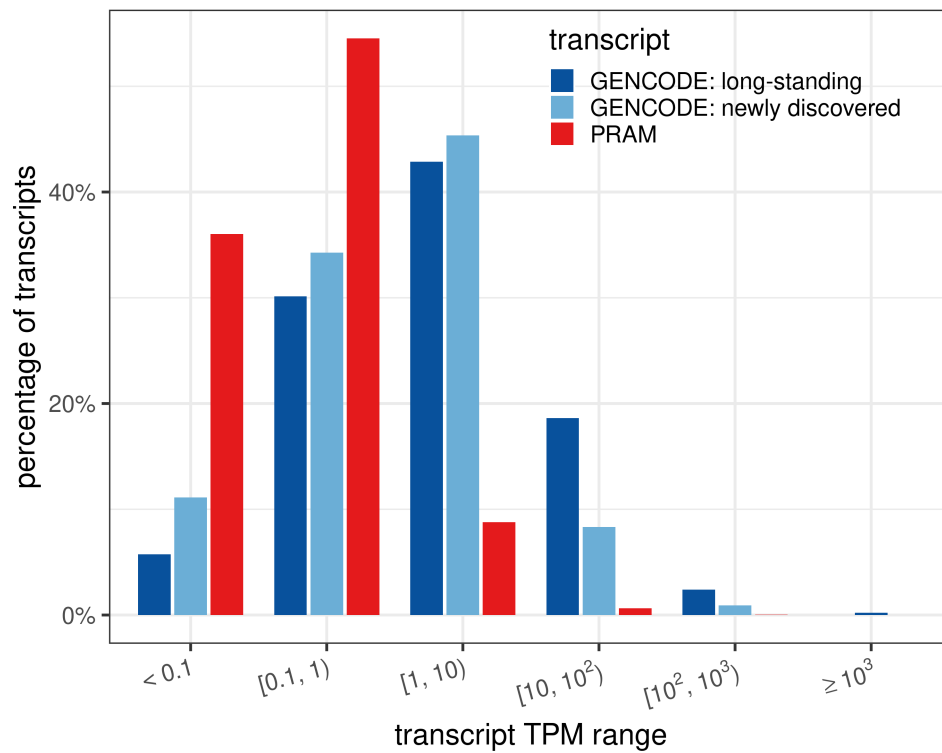

**Supplementary Figure 17. Distribution of GENCOD and PRAM transcripts stratified by their average expression levels in the seven cell lines.** Transcripts were from the 'kept' category in Supplementary Table 11.

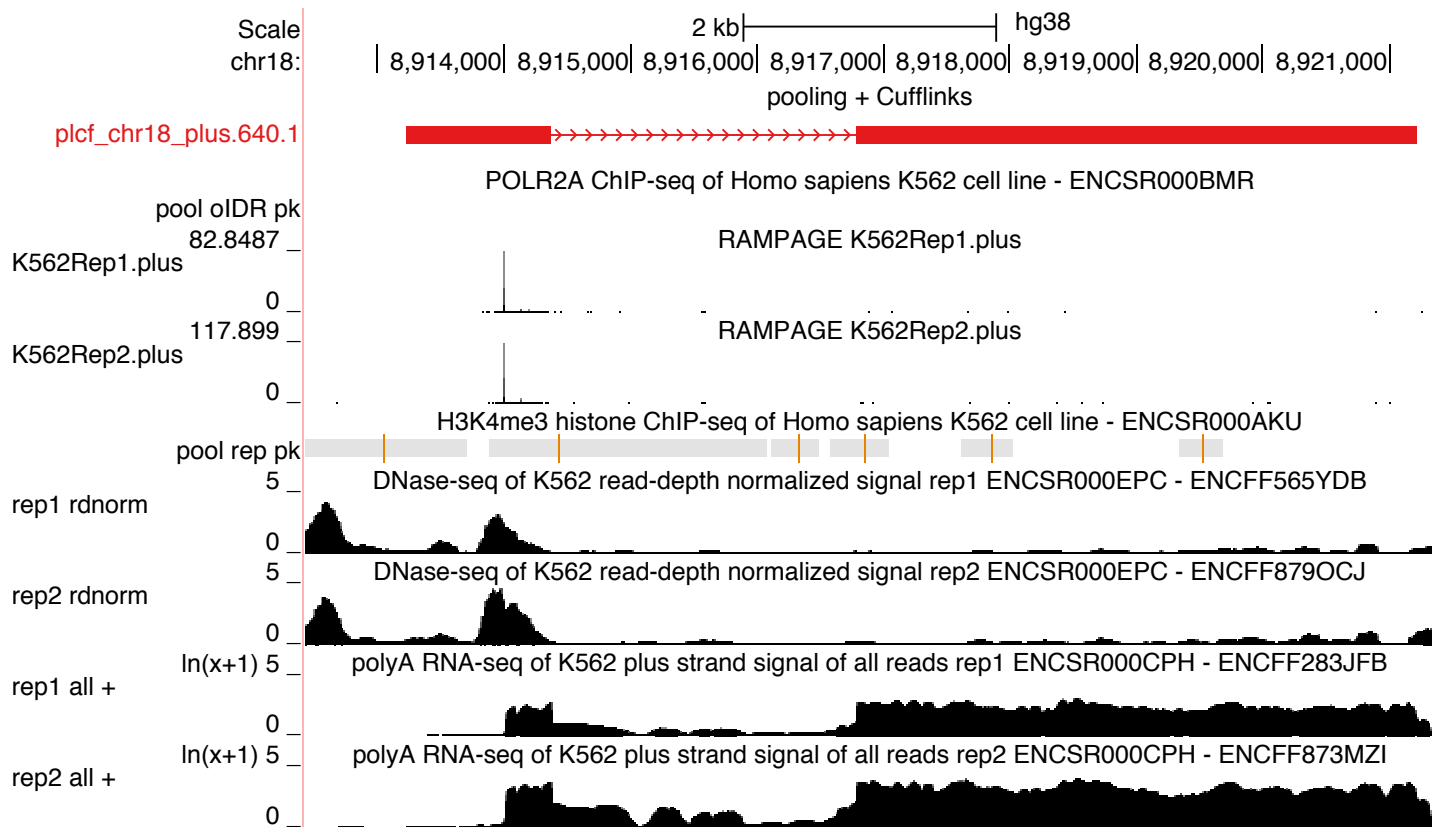

**Supplementary Figure 18. The second highly expressed PRAM transcript with supported genomic features.** All the genomic datasets were from ENCODE (<https://www.encodeproject.org>) with their accession IDs listed above each track. Accession IDs for RAMPAGE datasets are listed in Supplementary Table 13. The model 'plcf\_chr18\_plus.640.1' had an average TPM of 124 in K562 cells. It had high DNase-seq signals around its 5'-exon suggesting high chromatin accessibility and had multiple H3K4me3 ChIP-seq peaks suggesting active transcription. Moreover, 'plcf\_chr18\_plus.640.1' had strong RAMPAGE signals in close proximity to its transcription start site. All of these external genomic data supported the existence of this highly-expressed PRAM transcript.

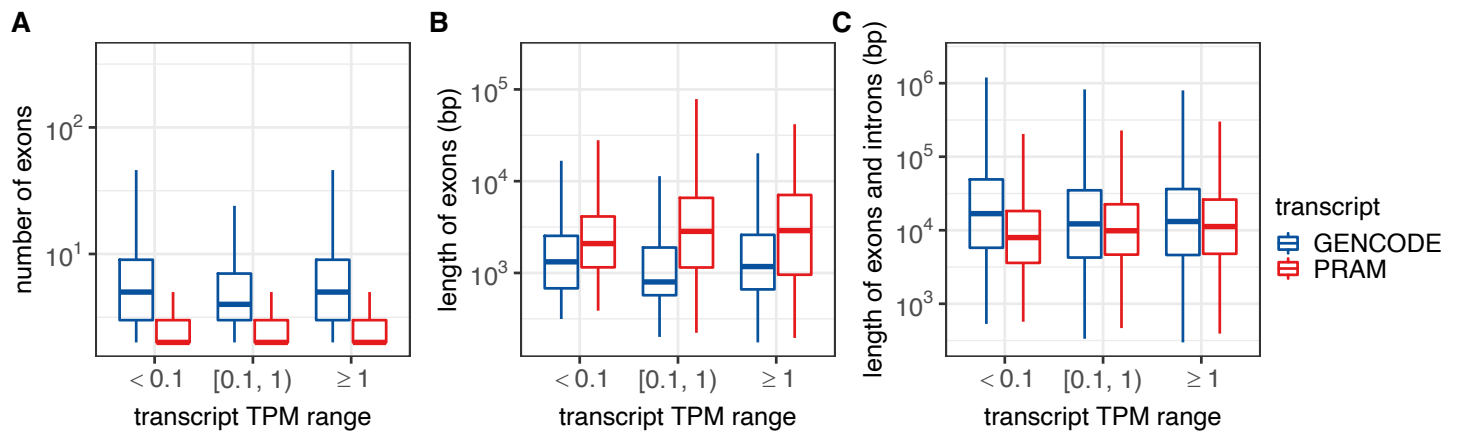

**Supplementary Figure 19. Numbers and lengths of GENCODE and PRAM transcript exon and introns.**  
 Selection of transcripts were the same as in Figure 2B.

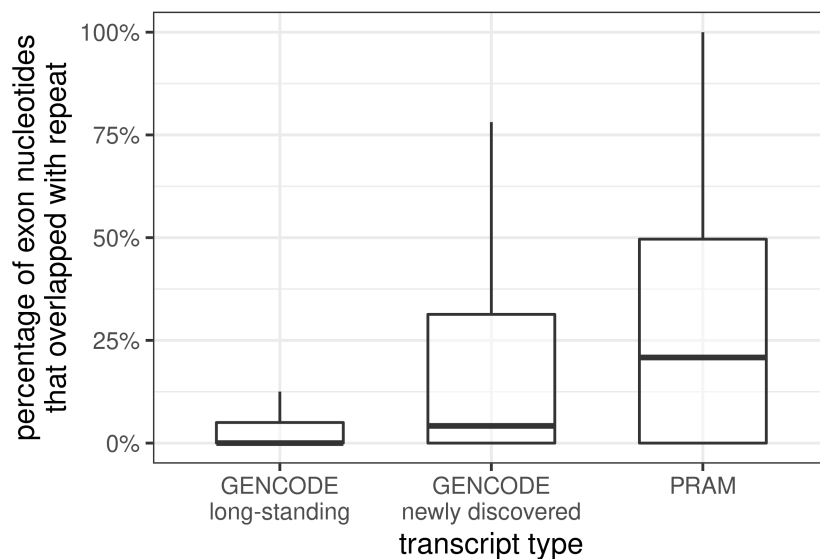

**Supplementary Figure 20. Fraction of exon nucleotides that overlapped with repeats.** 14,226 PRAM transcripts were compared with 1,034 GENCODE 'newly discovered' transcripts and 197,167 GENCODE 'long-standing' transcripts. Repeats were downloaded from UCSC Genome Browser's RepeatMasker track for hg38 (<https://genome.ucsc.edu/cgi-bin/hgTables>). We quantified overlap of exon nucleotides of PRAM transcripts to those of repeats from RepeatMasker and observed that about half of PRAM transcripts had less than 25% of their exon nucleotides overlapping with repeats and about three quarters of PRAM transcripts had less than 50% of their exon nucleotides overlapping with repeats. As positive controls, we repeated the same analysis for 'newly discovered' and 'long-standing' GENCODE transcripts. They have lower overlap compared to PRAM transcripts. In particular, 'long-standing' transcripts have median fraction at 0 and the 3<sup>rd</sup> quartile at about 5%. However, PRAM transcripts did not completely or largely correspond to repeats. 26% (3,686 of 14,226) of the PRAM transcripts and 45% (469 of 1,034) 'newly discovered' GENCODE transcripts did not have their exons overlapping with any repeat at all.

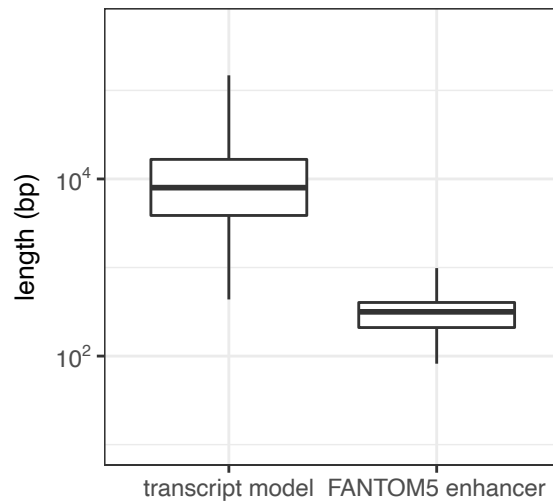

**Supplementary Figure 21. Lengths of PRAM transcripts and FANTOM5 enhancers.** Fantom5 enhancers were from the 'robust set' downloaded from [http://enhancer.binf.ku.dk/presets/robust\\_enhancers.bed](http://enhancer.binf.ku.dk/presets/robust_enhancers.bed) and lifted from human genome hg19 to hg38 for comparison with PRAM transcripts.



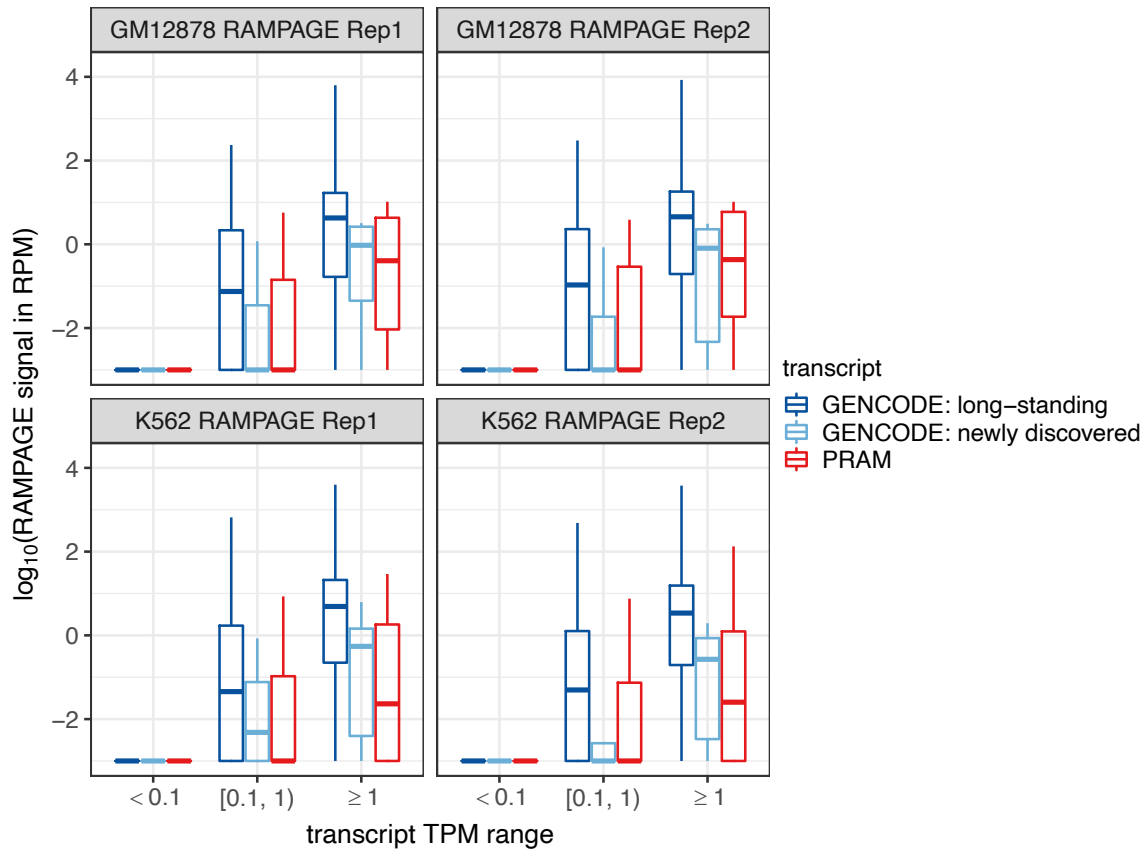

**Supplementary Figure 22. RAMPAGE signals of human GENCODE and PRAM transcripts.** Box plots are based on transcripts listed as ‘promoter mappability  $\geq 0.8$ ’ in Supplementary Table 12. RAMPAGE signals are from the two GM12878 replicates and the two K562 replicates listed in Supplementary Table 13 and are displayed as panel strip titles. RAMPAGE signals were calculated as read per millions (RPM) with an added factor of  $10^{-3}$  (maximum non-zero RPM is 0.0176) to avoid logarithm of zero.

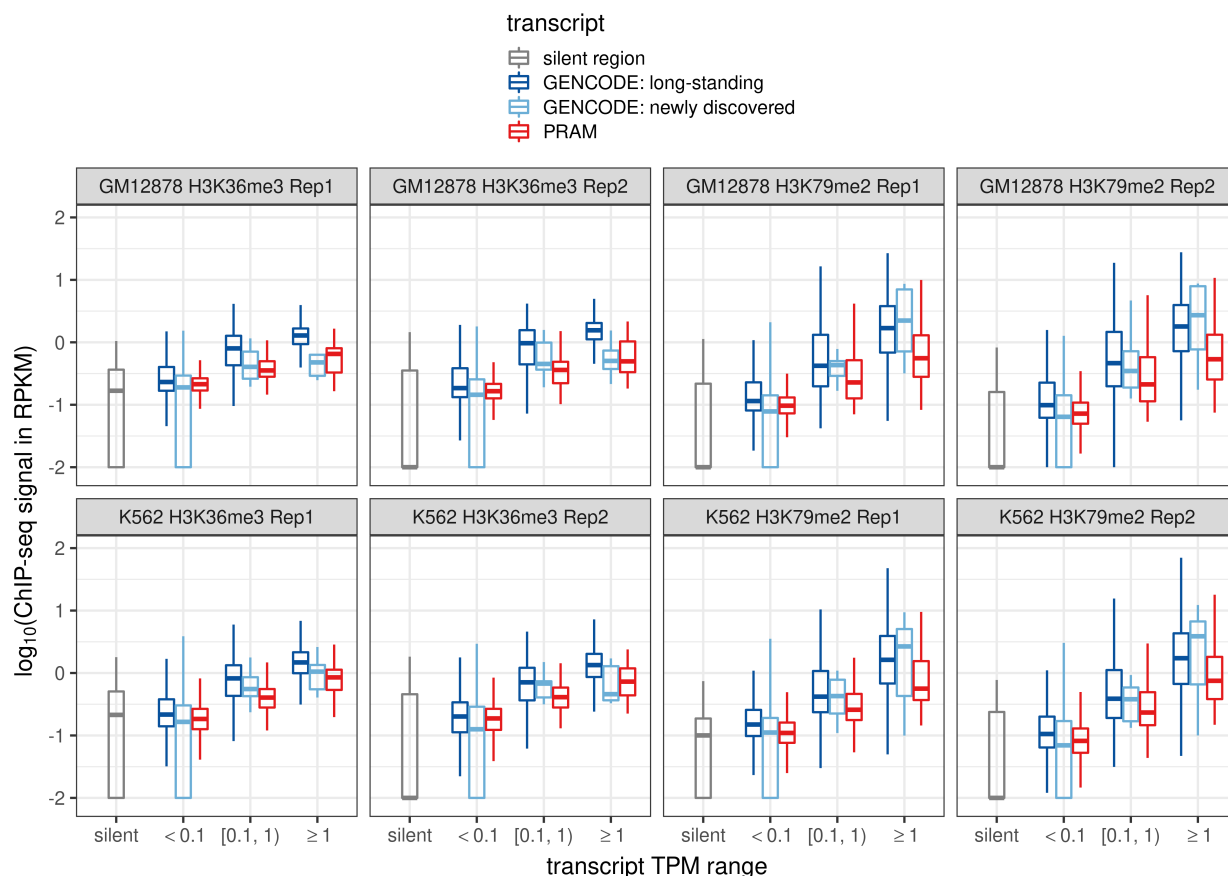

**Supplementary Figure 23. Transcription-associated epigenetic signals of human GENCODE and PRAM transcripts as well as silent regions as negative control.** Box plots were based on transcripts listed as ‘transcript mappability  $\geq 0.8$ ’ in Supplementary Table 12. ChIP-seq signals were from the datasets listed in Supplementary Table 14 and are displayed as panel strip titles. ChIP-seq signals were calculated as read per kilobase millions (RPKM) with an added factor of  $10^{-2}$  to avoid taking logarithm of zero. We used the transcriptional repressive histone mark H3K27me3 (ChIP-seq peaks called by ENCODE: ENCFF512TQI for HeLa-S3; ENCFF337XQQ for HepG2; ENCFF140SFK for MCF-7; and ENCFF277NRX for SK-N-SH) to define a set of silent regions as negative controls. Since we used histone marks from GM12878 and K562 cell lines to validate transcripts, we avoided internal correlation of histone marks within the same cell line by utilizing H3K27me3 peaks from the other five cell lines that were used to predict PRAM transcripts. ENCODE does not have H3K27me3 ChIP-seq data in un-treated A549 cells (there are two datasets on A549 with treatments); therefore, we only had H3K27me3 peaks from four cell lines. We defined ‘silent regions’ as regions: (i) overlapping with H3K27me3 peaks across all four cell lines; (ii) with a minimal width of 200 bp; (iii) on Chromosomes 1-22 or X, where PRAM transcripts were derived. There were 163 such silent regions in total. We quantified their signals for marks H3K36me3 and H3K79me2 that associate with transcription, and compared them with those of GENCODE and PRAM transcripts. Overall, silent regions had lower transcription associated histone mark signals than GENCODE and PRAM transcripts in all three TPM ranges (except for GENCODE newly discovered transcripts in the lowest TPM category). This suggests that GENCODE and PRAM predictions have higher evidence of transcription as measured by these two histone modifications even at lower TPM settings.

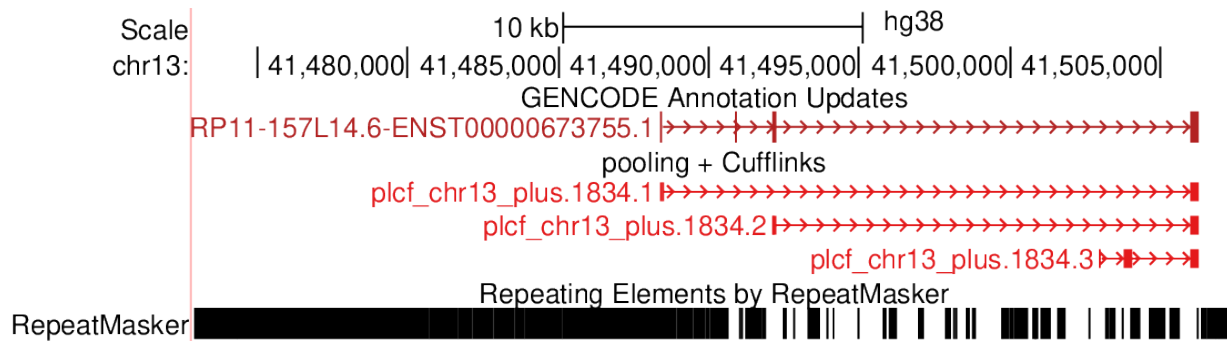

**Supplementary Figure 24. UCSC Genome Browser screenshot of a recently updated GENCODE transcript overlapped with PRAM transcripts.** We downloaded GENCODE's regularly updated data after the most recent release from [http://ftp.ebi.ac.uk/pub/databases/genCODE/update\\_trackhub/data/hg38.bed.gz](http://ftp.ebi.ac.uk/pub/databases/genCODE/update_trackhub/data/hg38.bed.gz) on Nov 26, 2019. Of all the 2,003 transcripts, 23 resided within the intergenic regions on Chromosome 1-22 and X, which we used to predict PRAM transcripts. 48% (11 out of 23) transcripts overlapped with PRAM transcripts. While not perfect, the high percentage overlap illustrated PRAM's predicted accuracy.

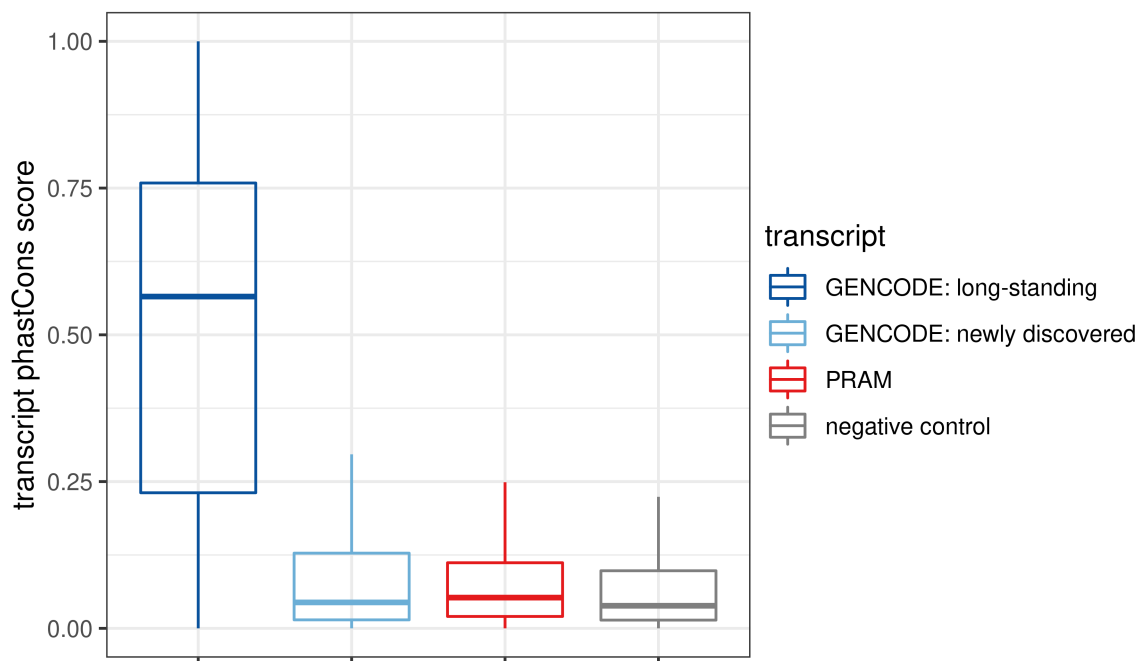

#### Supplementary Figure 25. The phastCons scores of GENCODE and PRAM human transcripts.

GENCODE transcripts were divided into 'long-standing' and 'newly discovered'. Randomly selected 1,000 non-transcript genomic regions with a width of 1kb were used as negative controls. The phastCons scores estimates the probability that each genomic nucleotide belongs to a conserved element. It takes on values between 0 and 1, where higher value indicates higher probability of conservation. We downloaded phastCons scores (hg38, based multiple alignments of 100 vertebrate species) from UCSC Genome Browser (<http://hgdownload.soe.ucsc.edu/goldenPath/hg38/phastCons100way/hg38.phastCons100way.bw>). We calculated the phastCons scores for all the 197,167 long-standing and 1,034 newly discovered GENCODE transcripts, and 14,226 PRAM transcripts. A transcript's phastCons score was defined as the average phastCons scores of all of its exons. We also generated a negative control, by randomly sampling 1,000 genomic regions with width of 1kb from the genomic locations that did not overlap with any GENCODE or PRAM transcripts. Next, we compared the distribution of phastCons scores for these four categories. The phastCons scores of newly discovered and PRAM transcripts were significantly differently from long-standing transcripts (Wilcoxon rank-sum test  $p < 10^{-16}$  for both newly discovered and PRAM transcripts) and the control regions (Wilcoxon rank-sum test  $p=5.4 \times 10^{-4}$  for newly discovered transcript;  $p=1.2 \times 10^{-9}$  for PRAM transcripts), whereas the difference between newly discovered and PRAM transcripts were not significant (Wilcoxon rank-sum test  $p=0.25$ ) under p-value cutoff of 0.01. This comparison suggested that newly discovered and PRAM transcripts shared similar degree of conservation across vertebrate. Their conservation is significantly higher than expected by chance and significantly lower than those of long-standing transcripts.

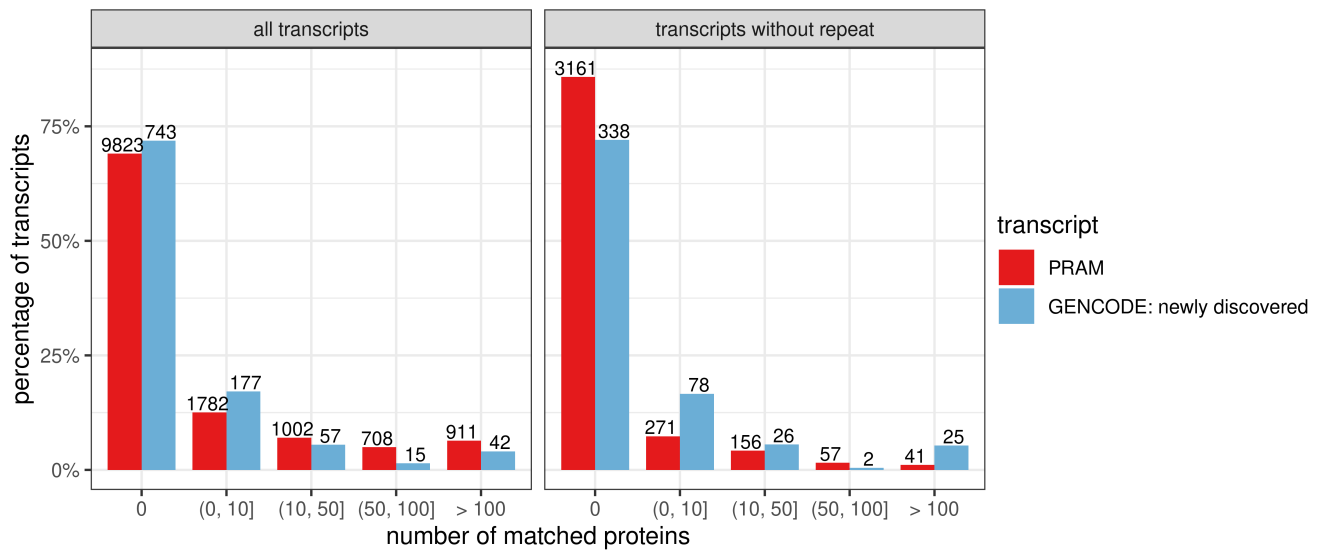

**Supplementary Figure 26. Percentage of PRAM and GENCODE ‘newly discovered’ transcripts stratified by the number of BLAST-matched proteins.** All the transcripts (left panel) and transcripts without any exon overlap with RepeatMasker repeats (right panel) were studied. The number of transcripts within each category are reported above the corresponding bar. We carried out the same BLAST analysis on the 1,034 GENCODE newly discovered transcripts. The percentages of matches to proteins stratified by number of proteins had a similar distribution to those of PRAM transcripts, which again suggested shared features between PRAM and GENCODE newly discovered transcripts. To rule out transcripts that mapped to retrotransposon sequences, we selected the 3,686 PRAM and 469 GENCODE newly discovered transcripts that did not have any exon overlap with RepeatMasker repeats. Their percentages of matched proteins showed a similar distribution to those of all the transcripts, where > 70% transcripts did not match to any proteins at all. We also noticed that there were 41 PRAM transcripts with matches to > 100 proteins.

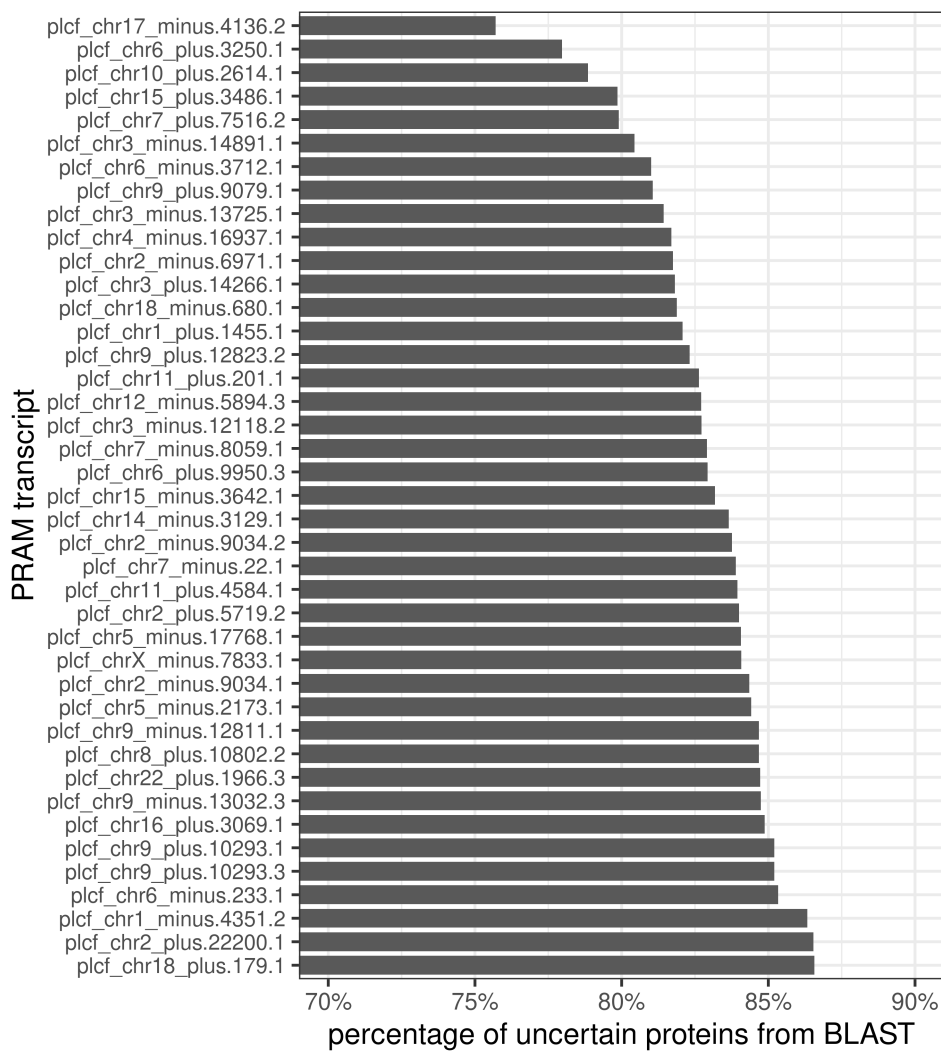

**Supplementary Figure 27. Percentage of uncertain BLAST-matched proteins for the 41 PRAM transcripts.** A protein is considered as uncertain if its name contains the following word: hypothetical, predicted, putative, uncharacterized, unknown, or unnamed. The 41 PRAM transcripts are those without any repeat and matched to more than 100 proteins by BLAST (Supplementary Figure 26).

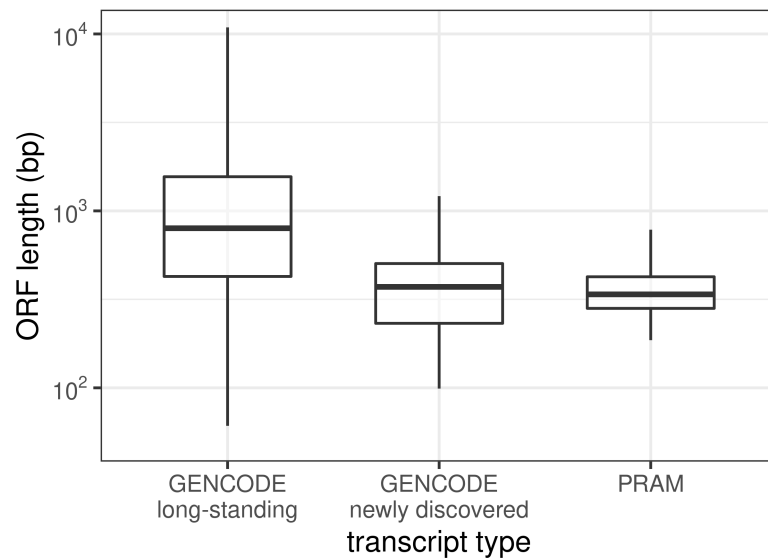

**Supplementary Figure 28. Comparison of ORF lengths between GENCODE and the 41 PRAM**

**transcripts.** GENCODE transcript ORFs were defined by GENCODE version 24 and were required to have feature column as 'CDS', gene type as 'protein\_coding', and transcript type as 'protein\_coding'. There are 79,654 such transcripts with ORFs from Chromosome 1 to 22 and X. 62 of them are 'newly discovered' GENCODE transcripts and the others are 'long-stranding' transcripts. ORFs of PRAM transcripts were predicted by ORFfinder (version 0.4.3, <https://www.ncbi.nlm.nih.gov/orffinder/>). ORF for each PRAM transcript was defined as the longest ORF among all predicted ones. The 41 PRAM transcripts are those without any repeat and matched to more than 100 proteins by BLAST (Supplementary Figure 26). 34 of the 41 transcripts have at least one ORF predicted.

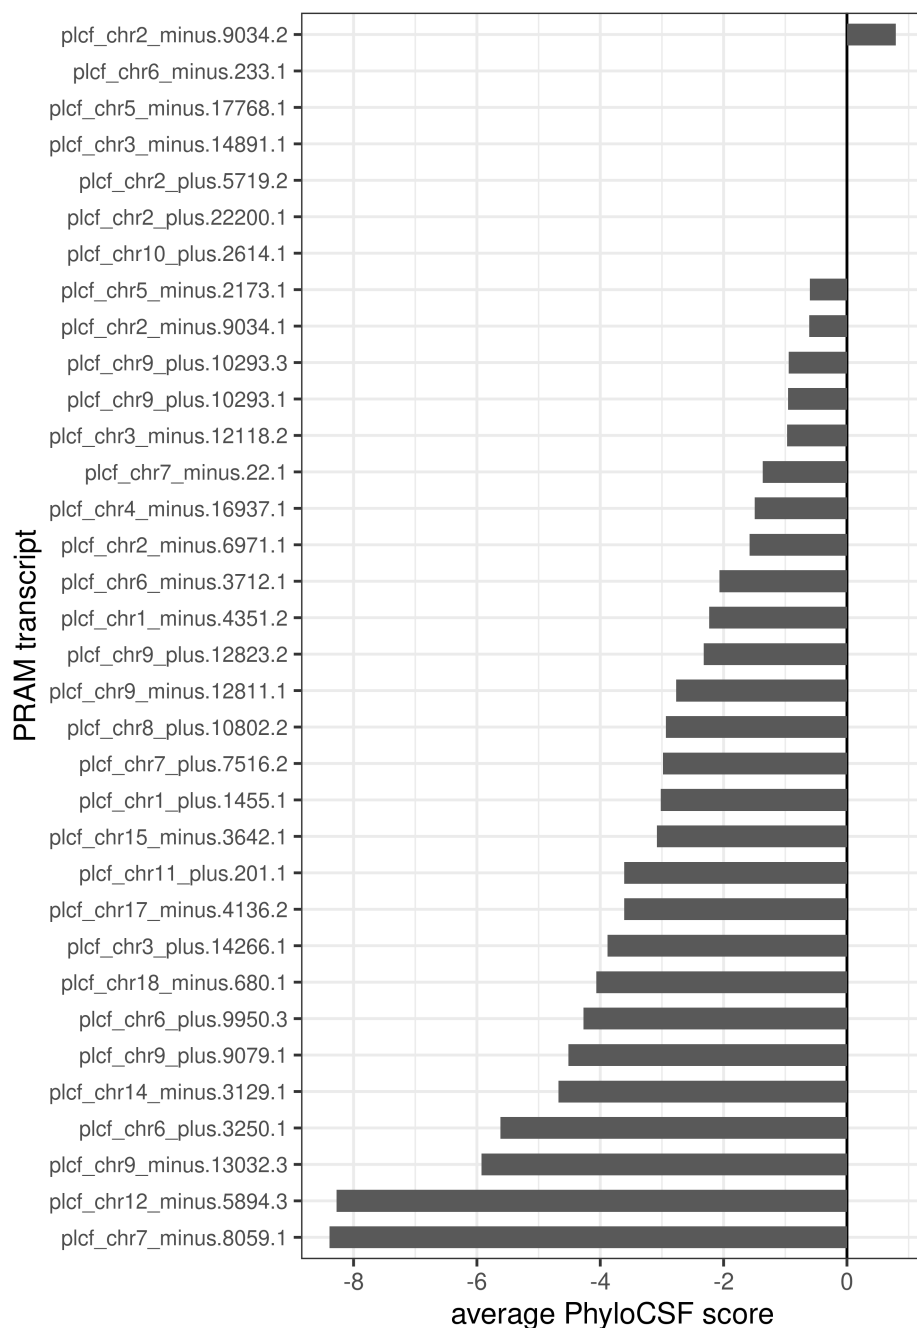

**Supplementary Figure 29. PhyloCSF scores of PRAM transcripts' predicted ORFs.** ORF's score was calculated using strand- and frame-matched smoothed PhyloCSF scores derived from 58-mammal alignments (<https://data.broadinstitute.org/compbio1/PhyloCSFtracks/>). A positive score indicates protein-coding potential. Shown are the 34 of 41 PRAM transcripts with at least one ORF predicted (Supplementary Figure 28).



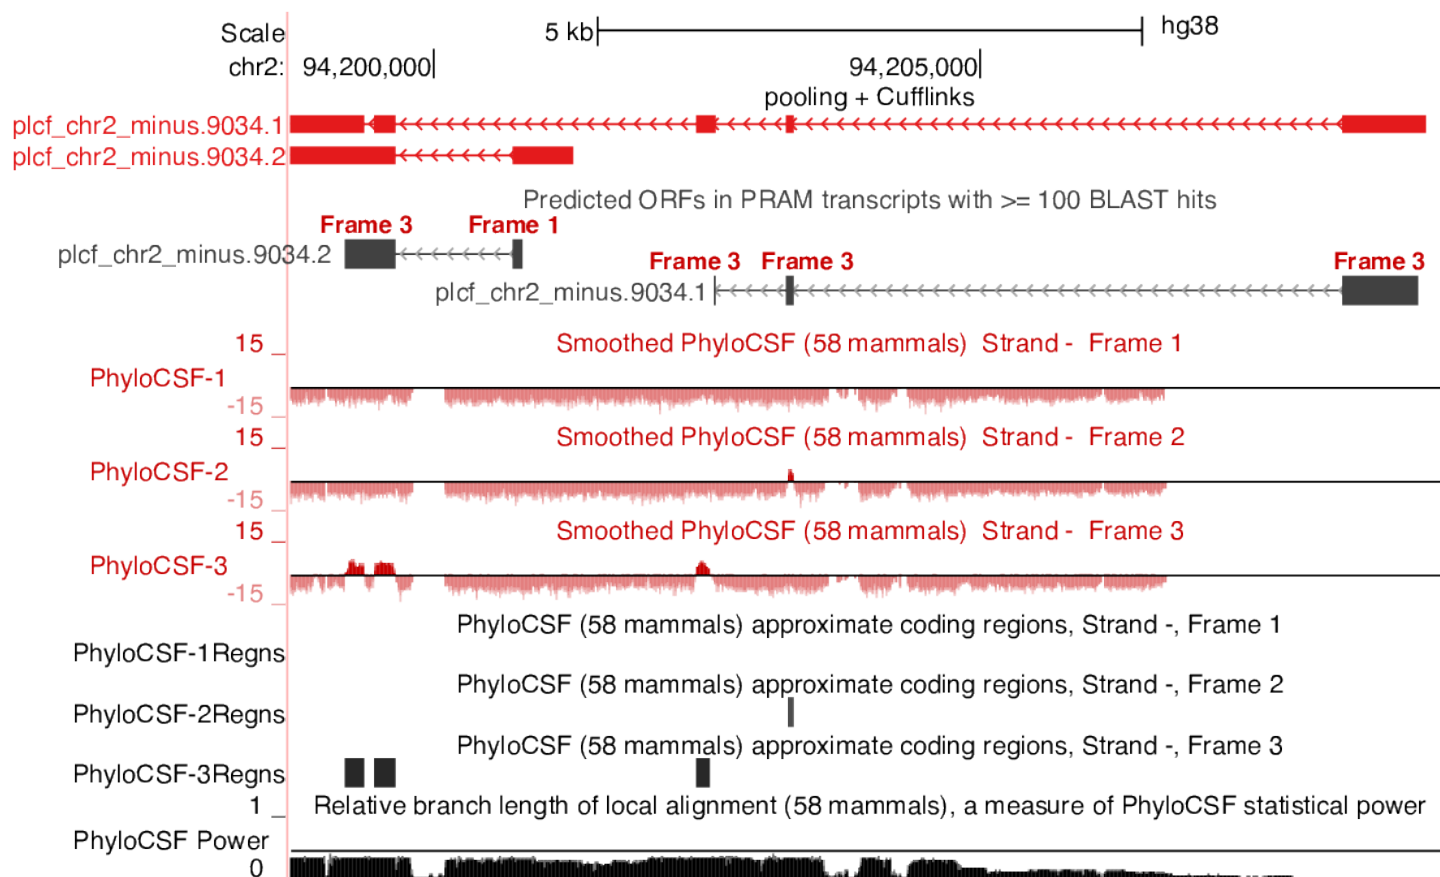

**Supplementary Figure 30. UCSC Genome Browser screenshot of two of the 41 PRAM transcripts, their predicted ORFs and PhyloCSF scores.** ORF's matched PhyloCSF frame was labeled in red bold text above each ORF.

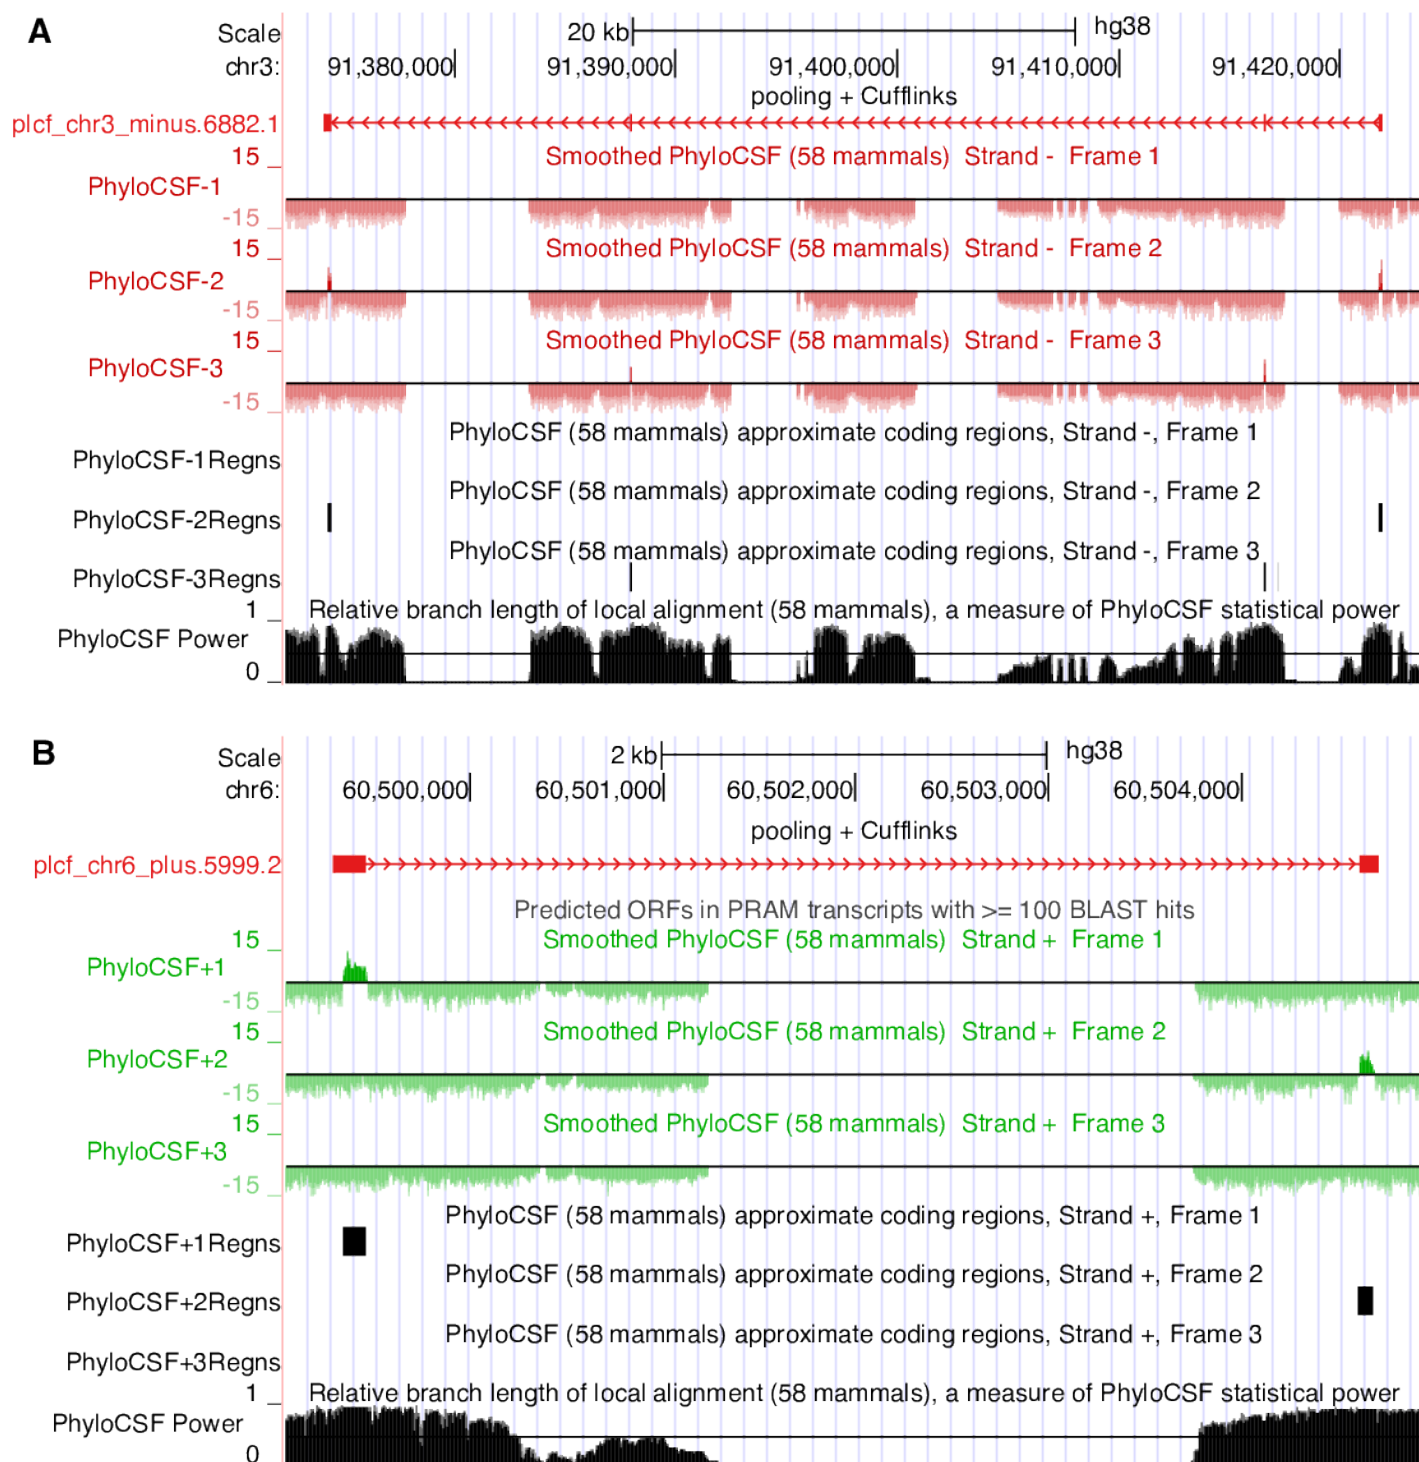

**Supplementary Figure 31. UCSC Genome Browser screenshot of the two PRAM transcripts that have >70% of their exons overlapped with PhyloCSF-predicted coding regions. Overlap was defined as on the same strand regardless of frame.**

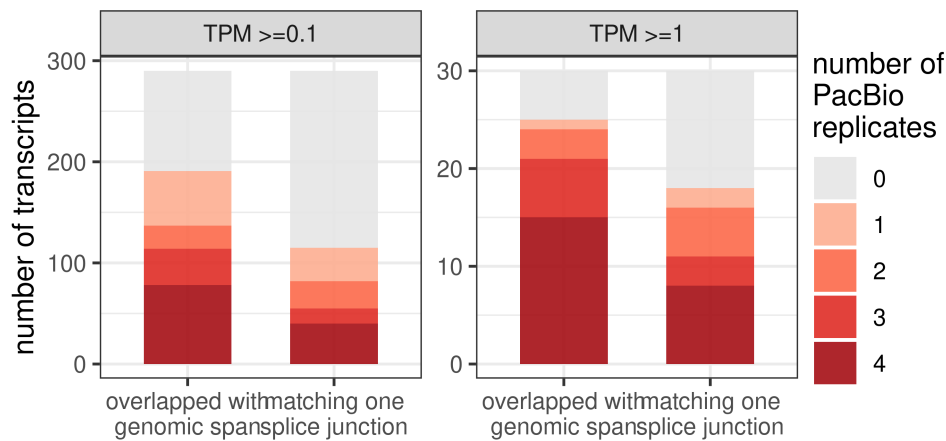

### Supplementary Figure 32. Comparison of PRAM transcripts with ENCODE GM12878 PacBio long reads.

ENCODE has PacBio data on GM12878 (<https://www.encodeproject.org/experiments/ENCSTR706ANY/>) in the format of FASTQ files from four replicates (as of Nov. 14, 2019). We followed ENCODE's long read RNA-seq analysis protocol (<https://www.encodeproject.org/documents/7ec9d66a-3b7e-4183-8677-e1df14770b44/@download/attachment/ENCODE%20Long%20Read%20RNA-Seq%20Analysis%20Pipeline%20%28Human%29.pdf>) to align reads to human genome hg38. The comparison of PacBio reads and PRAM transcripts were evaluated by two features: (i) overlap with genomic span: whether a PRAM transcript had a PacBio read overlapping with its genomic span (exons and introns); (ii) match to one splice junction: whether at least one of the splice junctions of a PRAM transcript matched exactly to a PacBio read splice junction. We made comparisons on two sets of PRAM transcripts: (i)  $TPM \geq 0.1$ : transcripts with  $TPM \geq 0.1$  in all of the six GM12878 ENCODE short-read RNA-seq datasets. This resulted in 290 transcripts. (ii)  $TPM \geq 1$ : transcripts with  $TPM \geq 1$  in all of the six GM12878 ENCODE short-read RNA-seq datasets. This resulted in 30 transcripts that were among the 290 transcripts identified above. In the ' $TPM \geq 0.1$ ' set (left panel), 66% (191 out of 290) transcripts had a PacBio read overlapping with their genomic span from at least one PacBio replicate. 27% (78 out of 290) transcripts had a PacBio read overlapping with their genomic span from all four PacBio replicates. The fraction of splice junction match was relatively smaller. 40% (115 out of 290) of PRAM transcripts had at least one of its splice junctions matched by a long read from at least one PacBio replicate. In the ' $TPM \geq 1$ ' set (right panel), 83% (25 out of 30) of PRAM transcripts had long-read overlap from at least one PacBio replicate and half (15 out of 30) of PRAM transcripts had long-read overlap from all four PacBio replicates. For splice junction match, the corresponding percentages were 60% (18 out of 30) and 27% (8 out of 30) from at least one PacBio replicate and all four replicates, respectively. In conclusion, a substantial fraction of PRAM transcripts overlapped with PacBio long reads and had matching splice junctions as well, providing further support for PRAM transcripts.

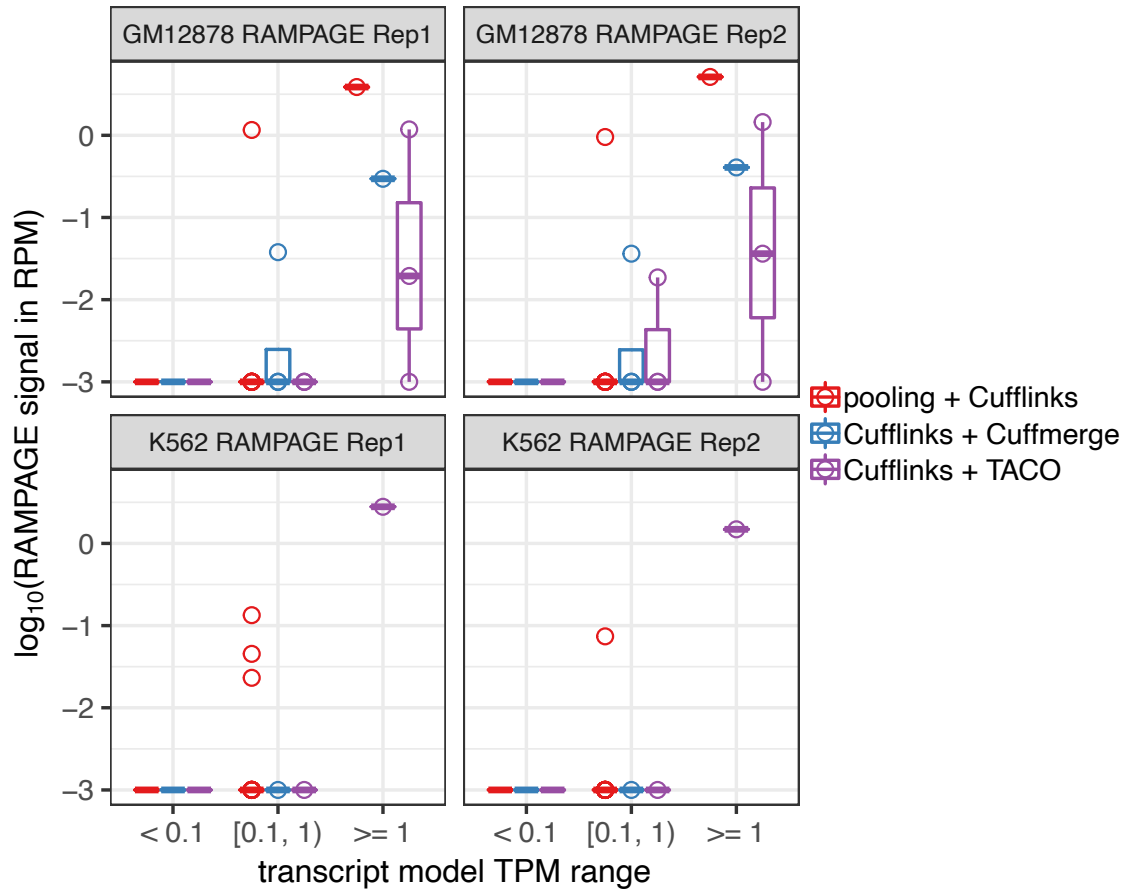

**Supplementary Figure 33. RAMPAGE signals of '1-Step' and '2-Step' specific human transcripts.** Box plots are based on models listed as 'promoter mappability  $\geq 0.8$ ' in Supplementary Table 20. Models with TPM range of  $[0.1, 1)$  and  $\geq 1$  are also displayed as points. 'pooling + Cufflinks' and 'Cufflinks + Cuffmerge' did not have any model with TPM  $\geq 1$  in K562. RAMPAGE signals were based on the two GM12878 replicates and the two K562 replicates listed in Supplementary Table 13 and displayed as panel strip titles. RAMPAGE signals were calculated as read per millions (RPM) with an added factor of  $10^{-3}$  (maximum non-zero RPM is 0.0176) to avoid logarithm of zero.

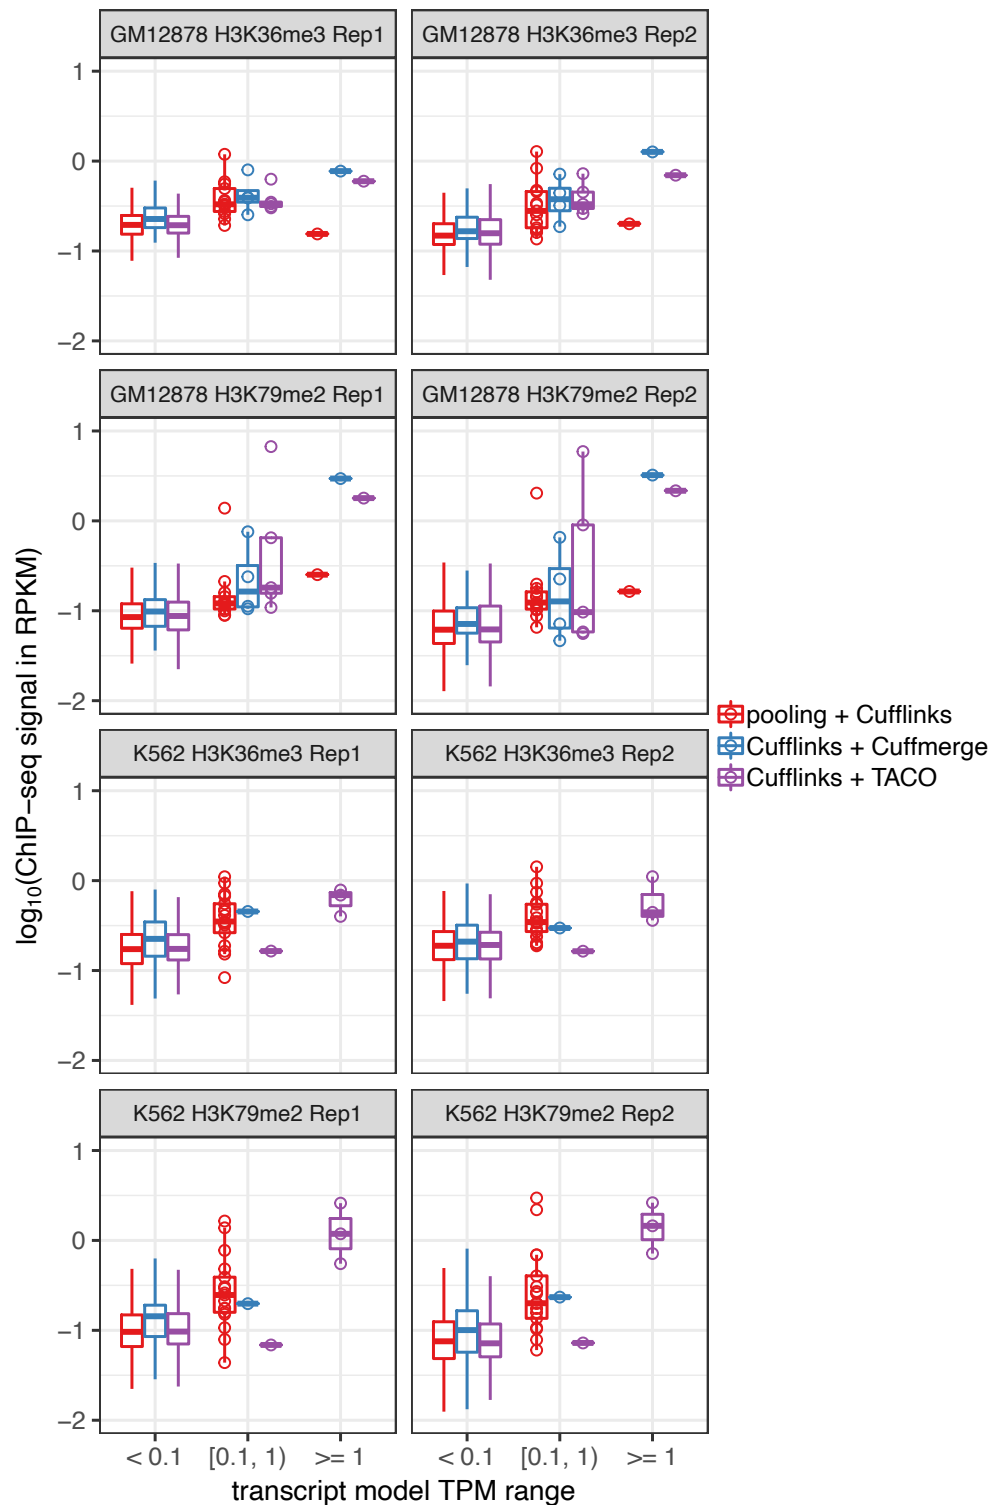

**Supplementary Figure 34. Epigenetic signals of '1-Step' and '2-Step' specific human transcripts.** Box plots are based on models listed as 'transcript mappability  $\geq 0.8$ ' in Supplementary Table 20. Models with TPM range of '[0.1, 1)' and '>= 1' are also displayed as points. 'pooling + Cufflinks' and 'Cufflinks + Cuffmerge' did not have any model with TPM  $\geq 1$  in K562. ChIP-seq signals are from the datasets listed in Supplementary Table 14 and displayed as panel strip titles. ChIP-seq signals were calculated as read per kilobase millions (RPKM) with an added factor of  $10^{-5}$  to avoid logarithm of zero.

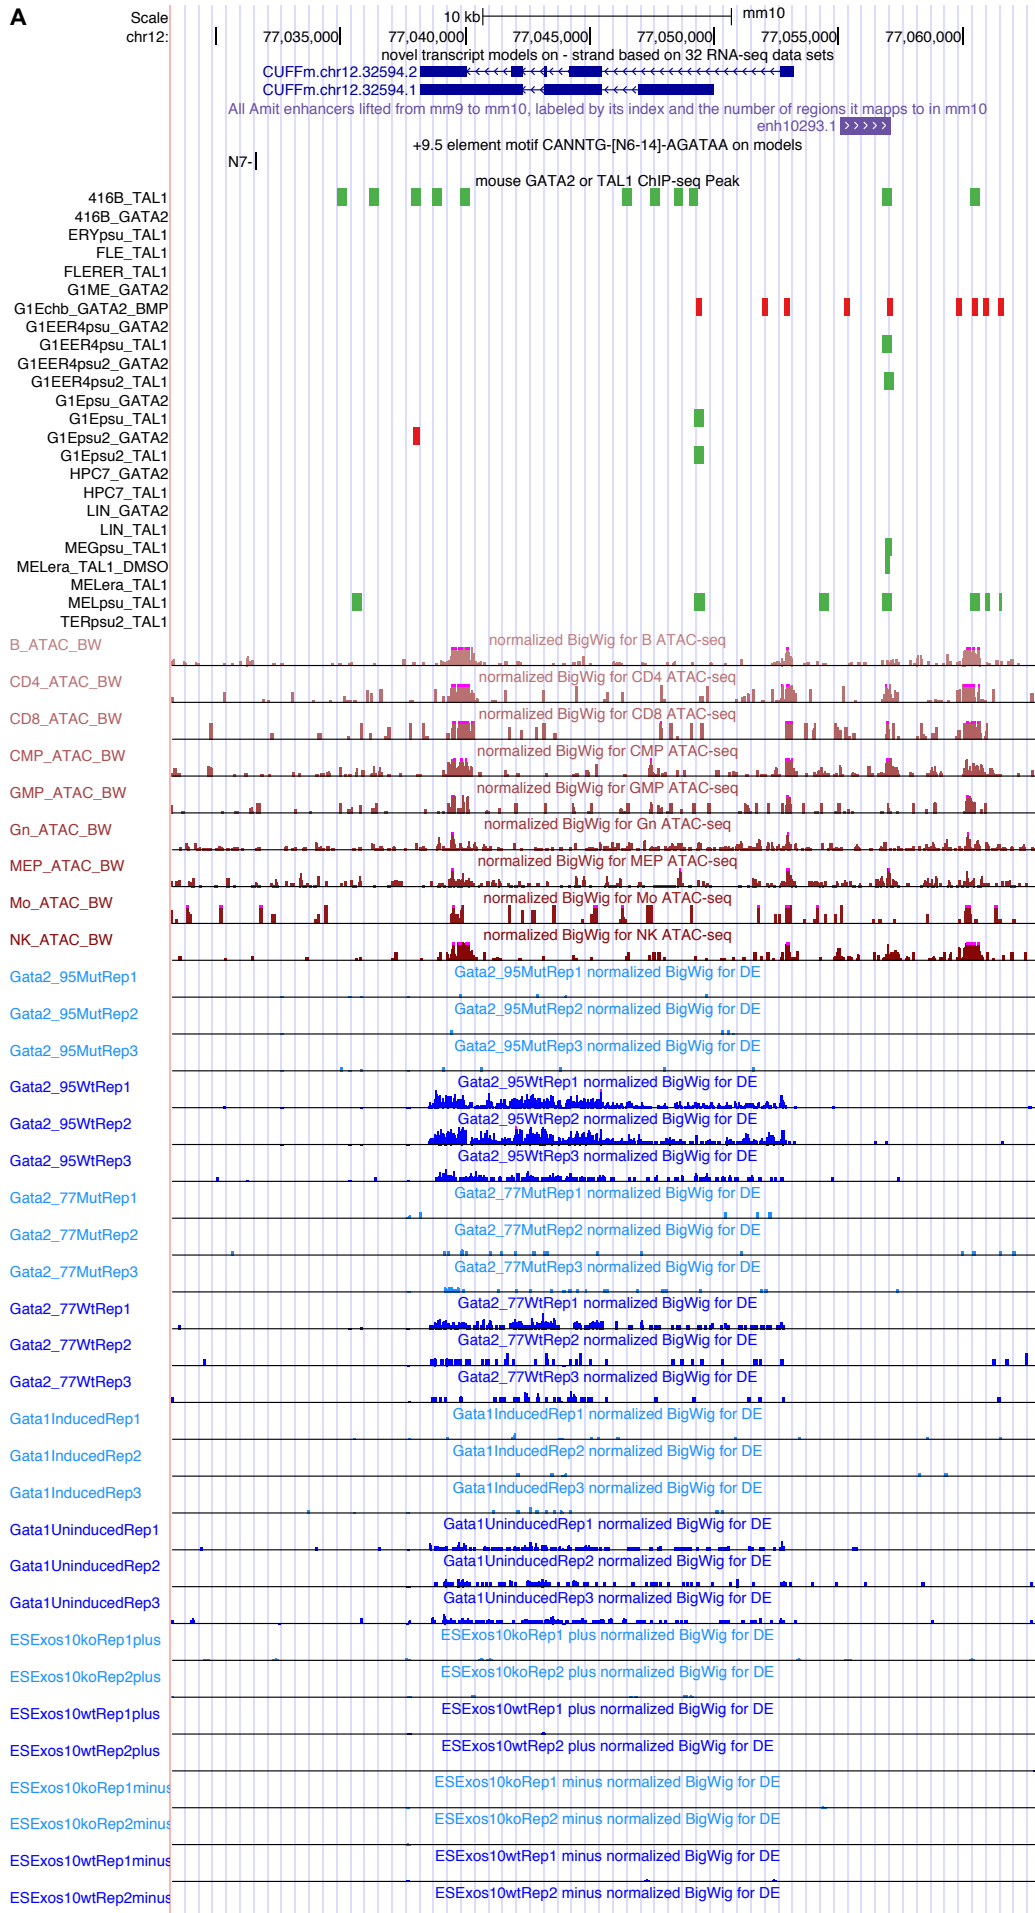

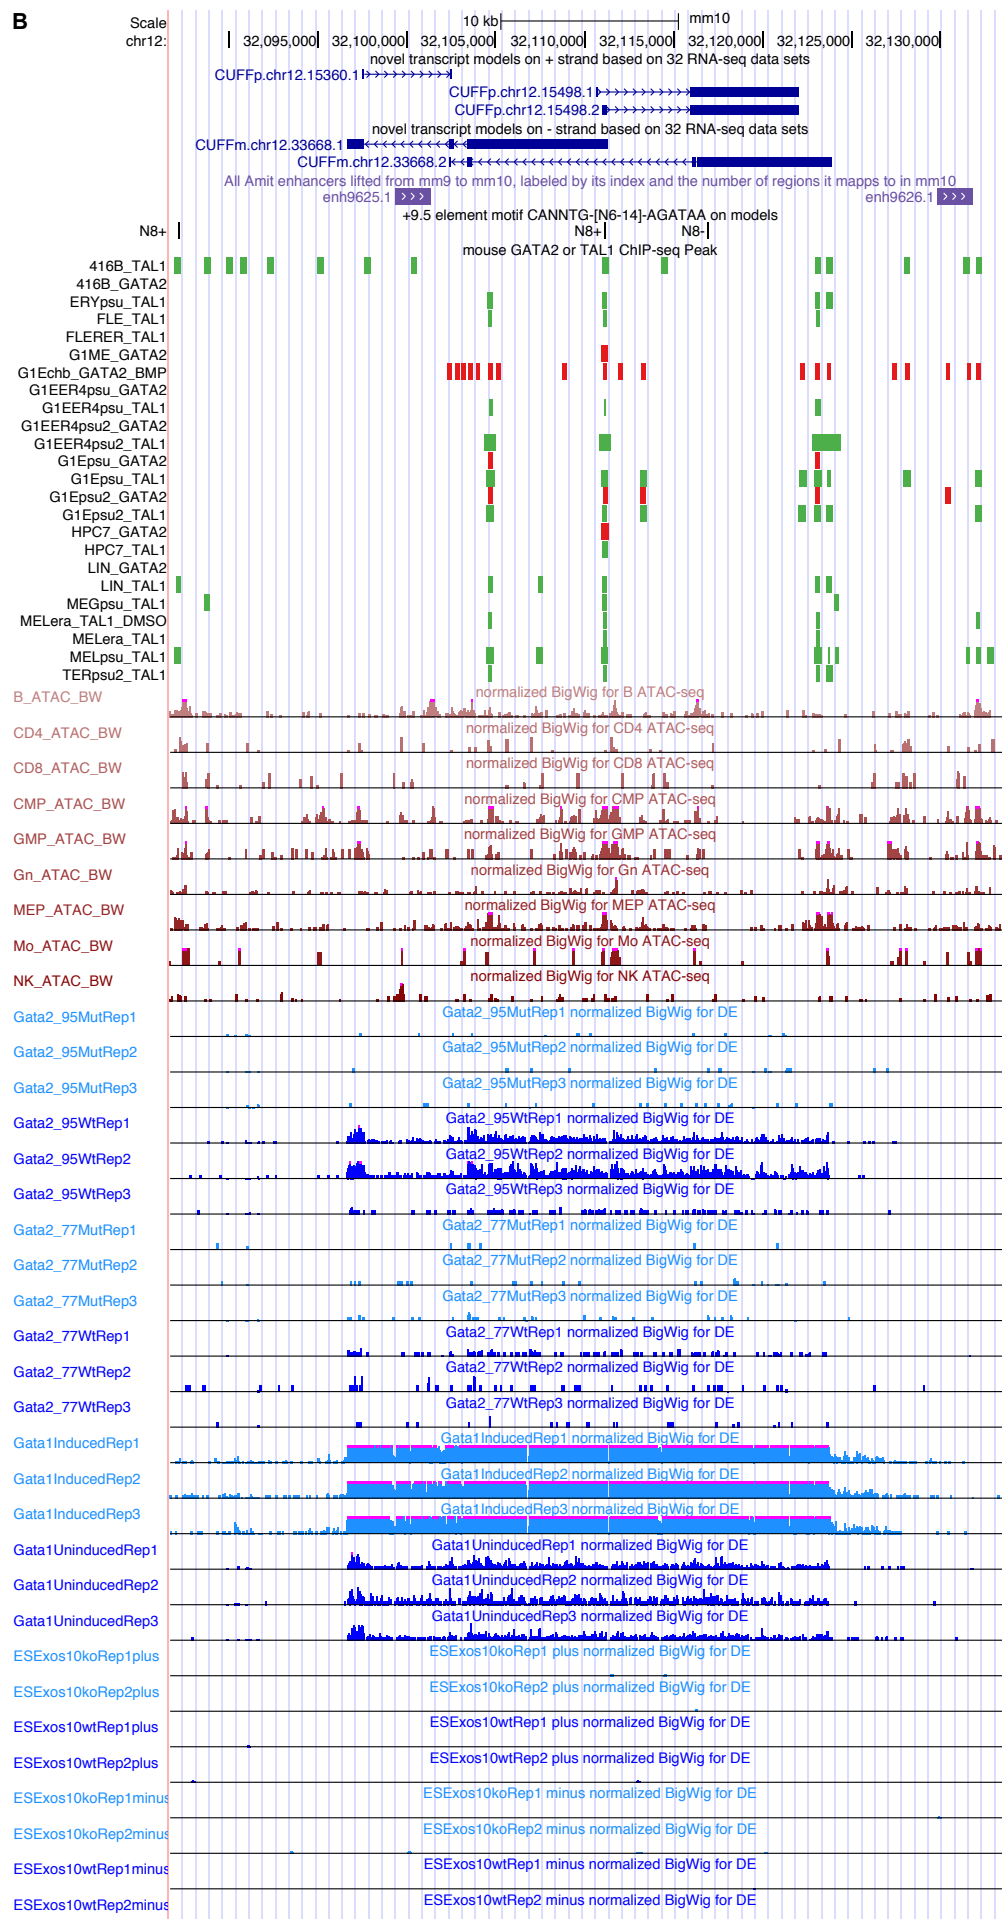

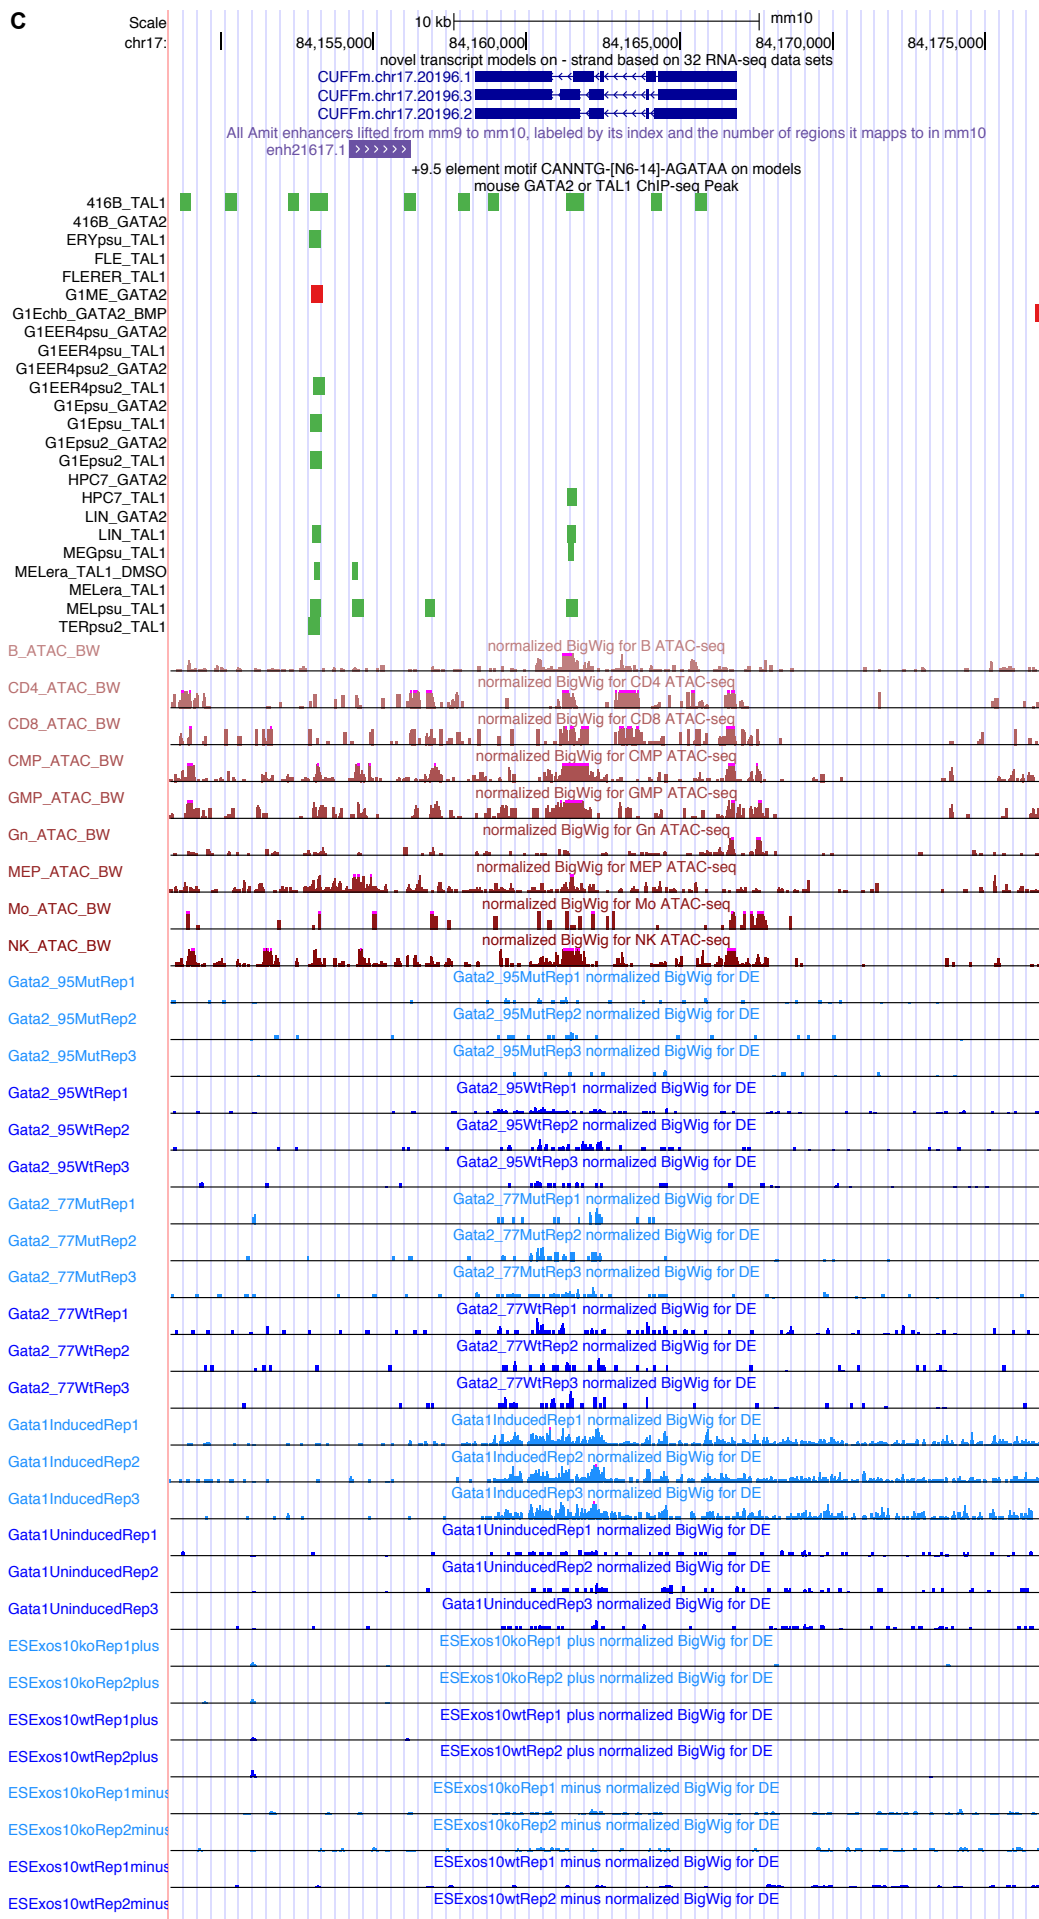



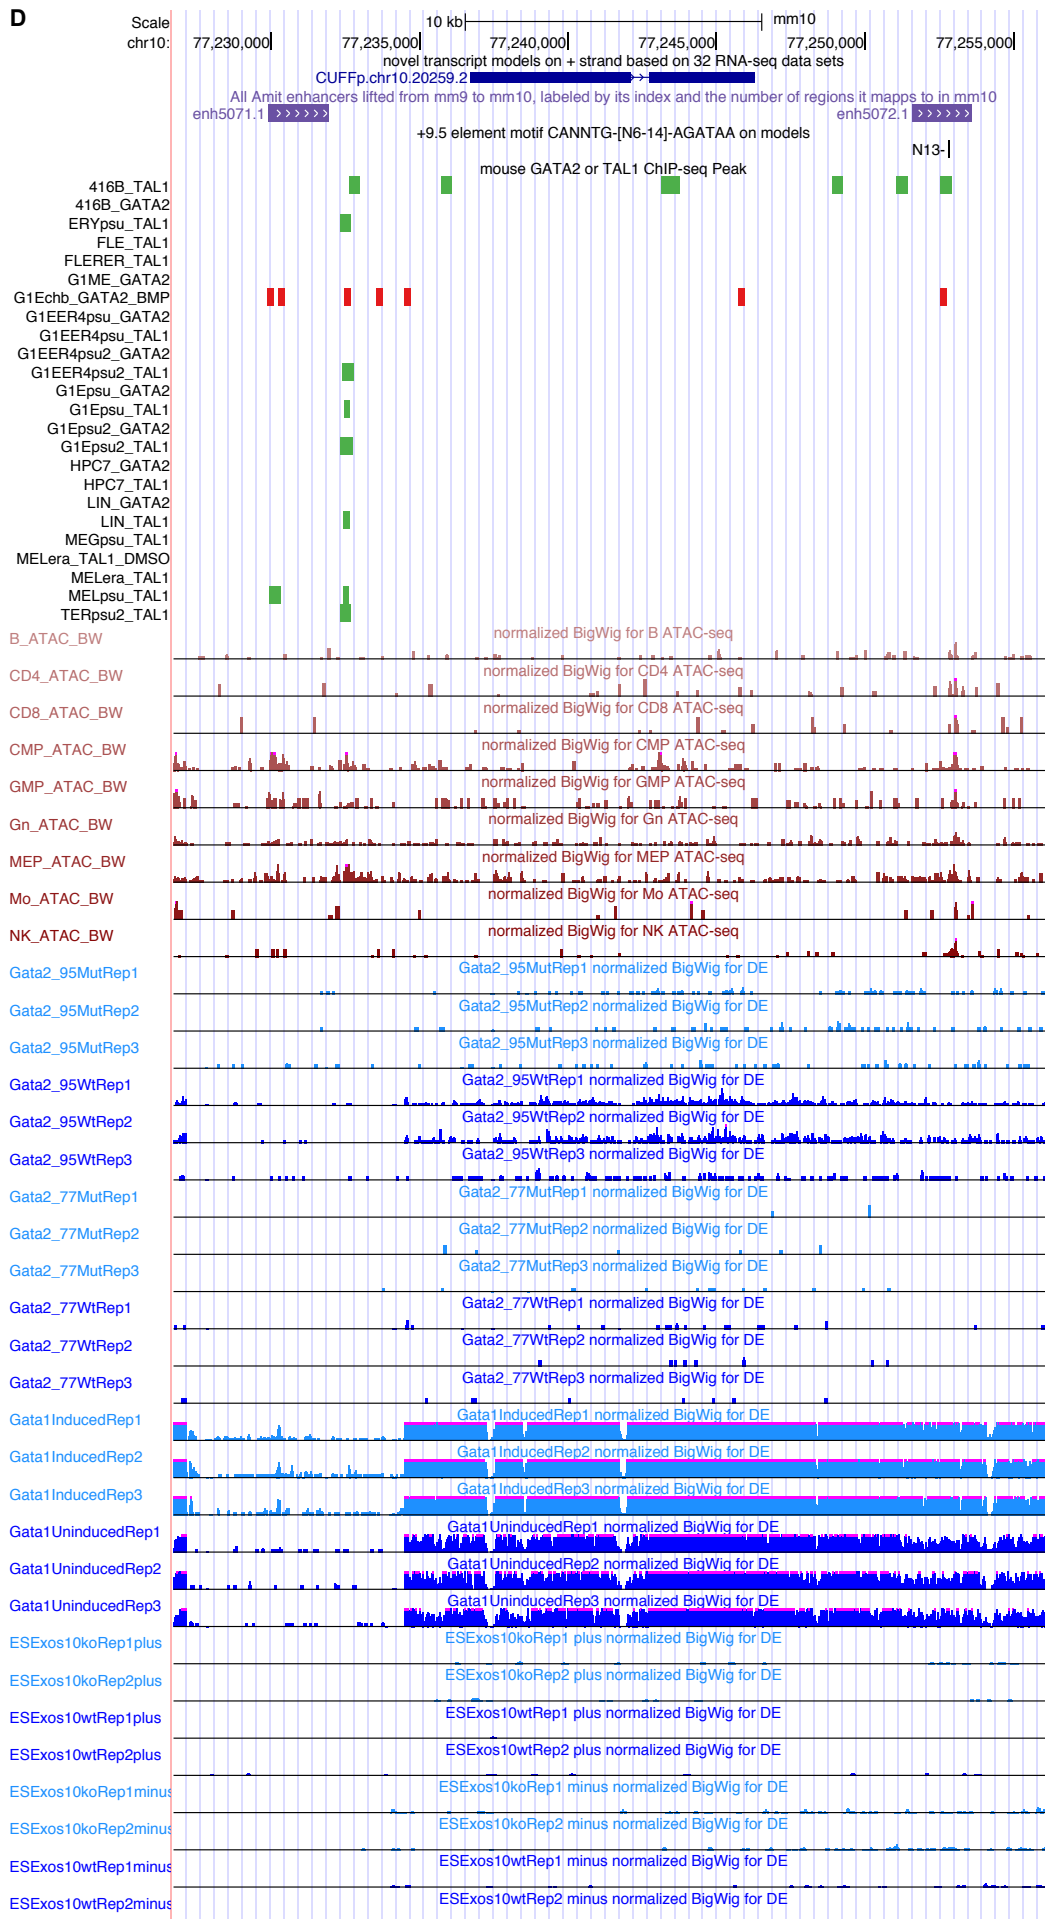

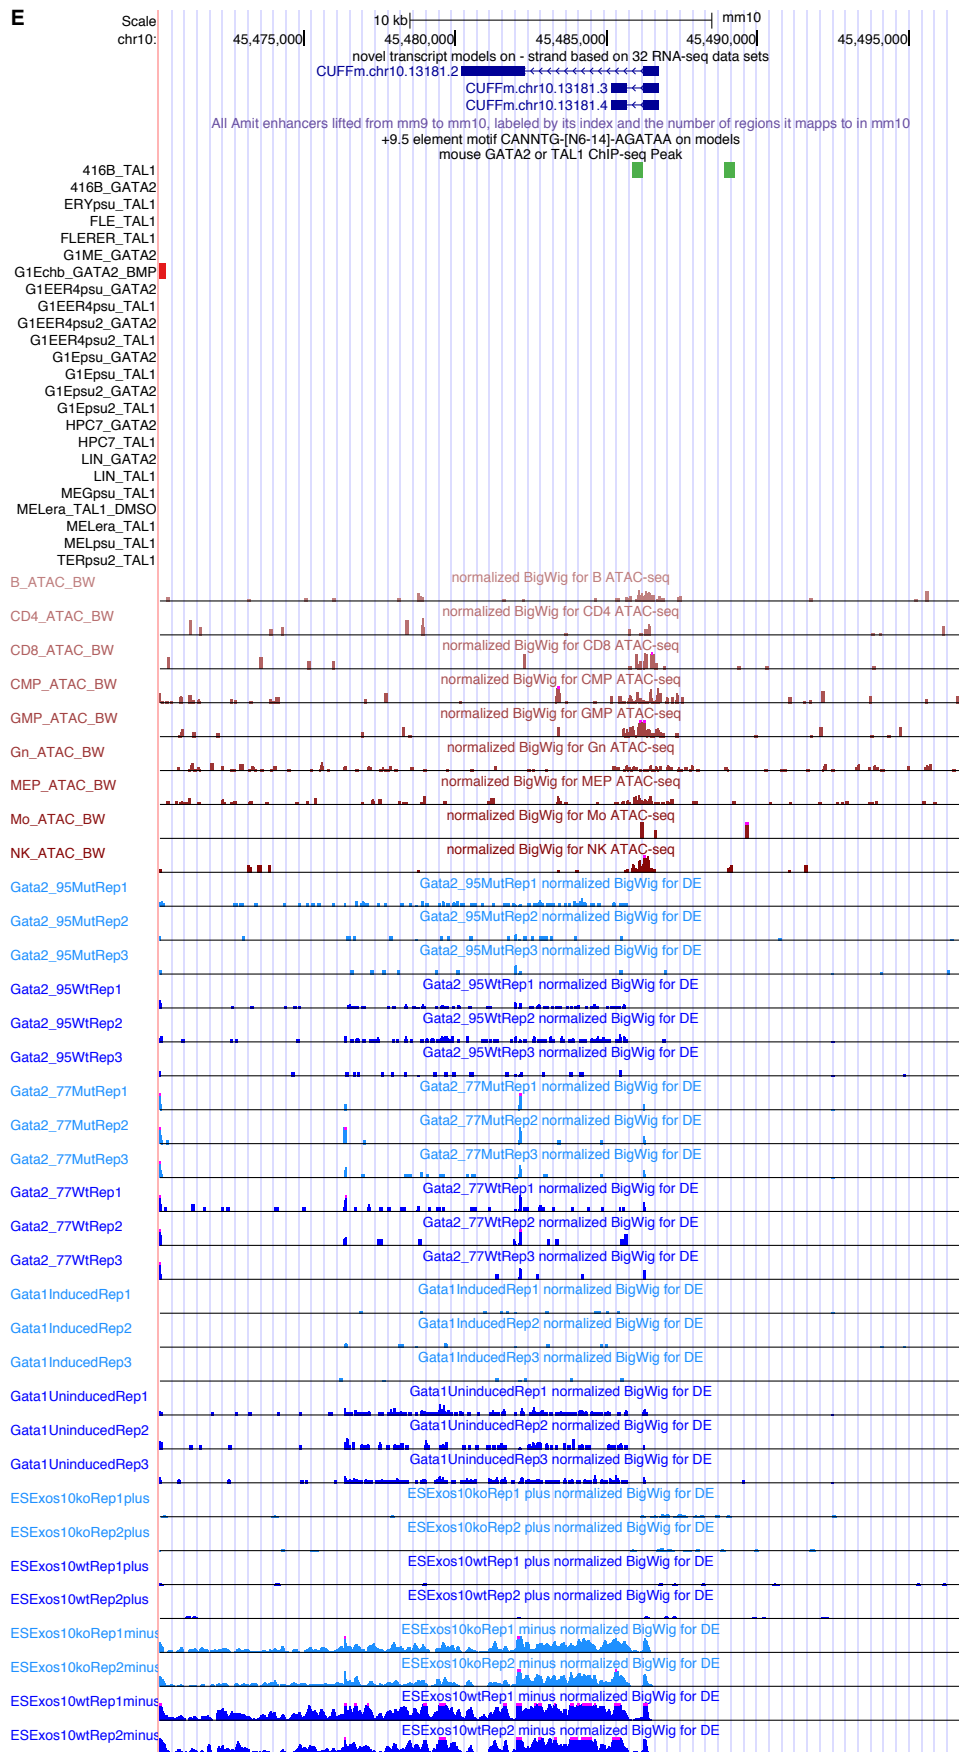

**Supplementary Figure 35. The six PRAM mouse gene models and their genomic features. (A)** CUFFm.chr12.32594; **(B)** CUFFm.chr12.33668 and CUFFp.chr12.15498; **(C)** CUFFm.chr17.20196; **(D)** CUFFp.chr10.20259; **(E)** CUFFm.chr10.13181.

Mouse

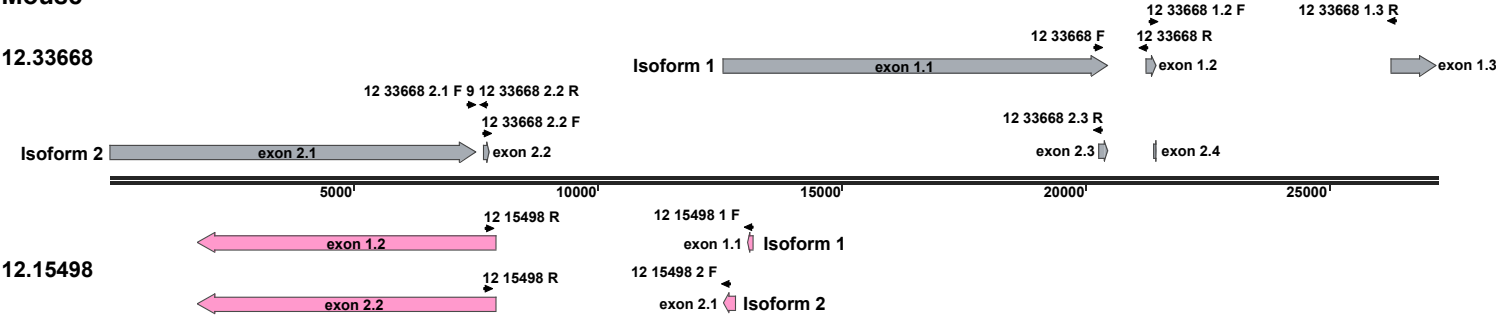

Human

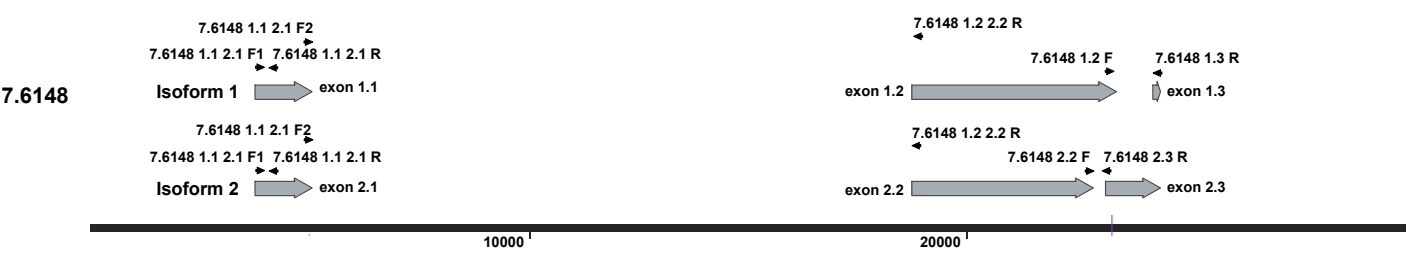

**Supplementary Figure 36. Primer diagrams for PRAM mouse and human transcripts.** Forward (F) and reverse (R) primers were denoted for PRAM mouse transcripts of CUFFm.chr12.33668 and CUFFp.chr12.15498, human K562 transcripts of CUFFm.chr7.6148. Primer sequences were listed in Supplementary Table 25. Prefixes of model names were removed for brevity.

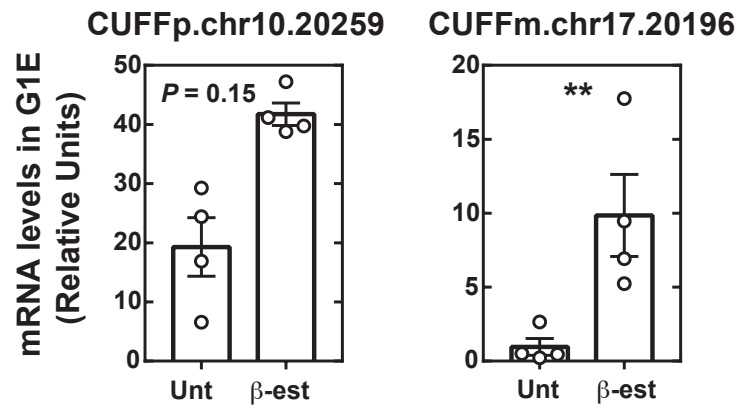

**Supplementary Figure 37. CUFFp.chr10.20259 and CUFFm.chr17.20196 expression levels in G1E ER-GATA1 by qRT-PCR.** Measurements were performed in untreated (Unt) and  $\beta$ -estradiol-treated ( $\beta$ -est) G1E-ER-GATA1 cells for 48 hours. P values were calculated by two-tailed Student's *t*-test (\*\* for  $p < 0.01$ ).

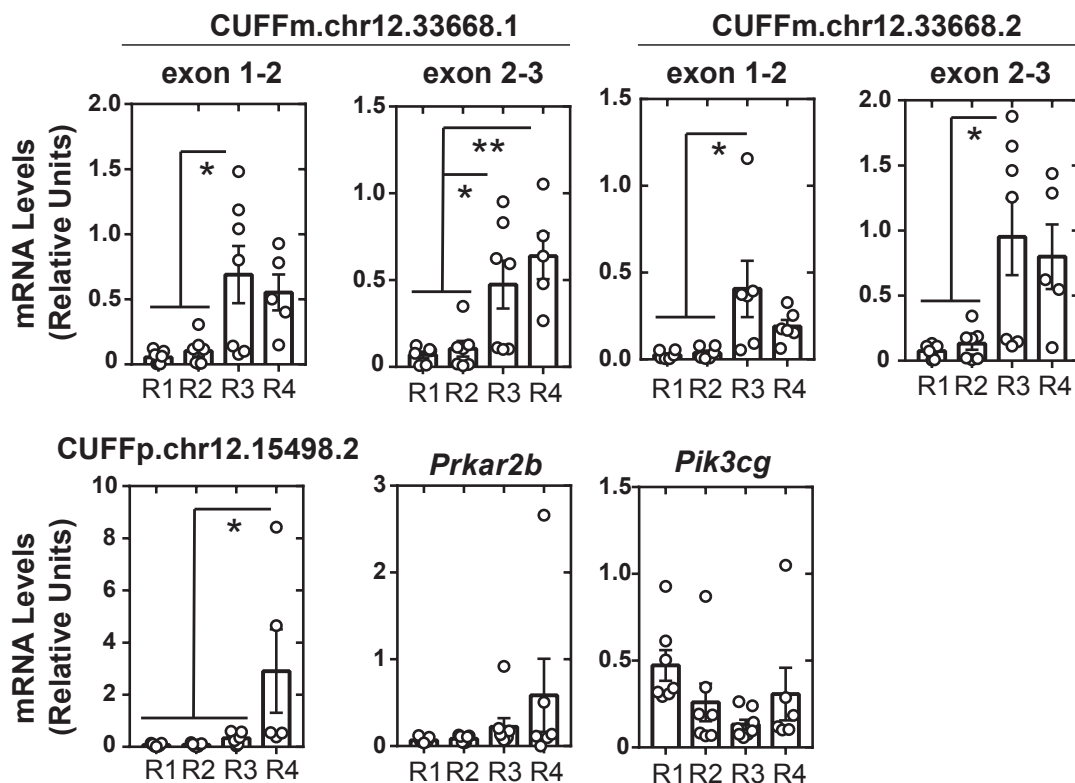

**Supplementary Figure 38. Expression levels of PRAM models and their neighboring genes in sorted fetal liver cells by qRT-PCR.** Expression levels of two mouse PRAM gene models CUFFm.chr12.33668 and CUFFp.chr12.15498 and their upstream and downstream neighbors *Prkar2b* and *Pik3cg* were measured by qRT-PCR during erythroid maturation (R1 to R4) of fetal liver cells. P values were calculated by two tailed Student's *t*-test (\* for  $p < 0.05$ , \*\* for  $p < 0.01$ ).

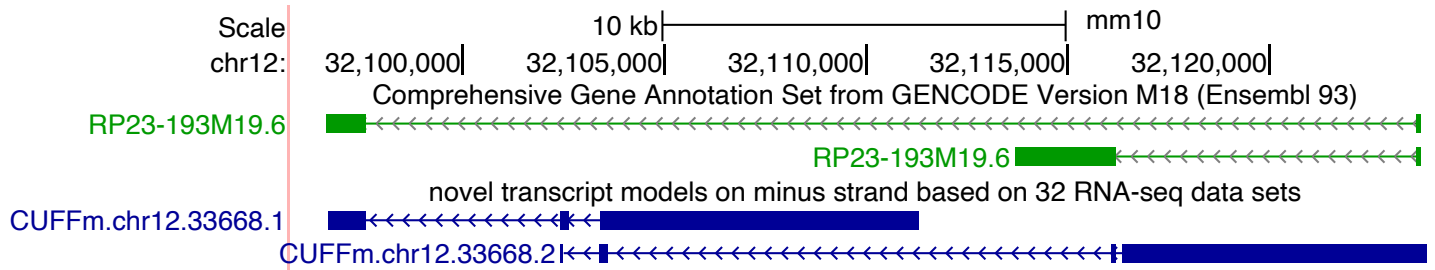

**Supplementary Figure 39. PRAM mouse transcripts overlapped with newly annotated GENCODE transcripts.** UCSC Genome Browser screenshot of PRAM mouse transcript CUFFm.chr12.33668.1 and CUFFm.chr12.33668.2 with transcripts from a recent mouse GENCODE annotation (vM18).

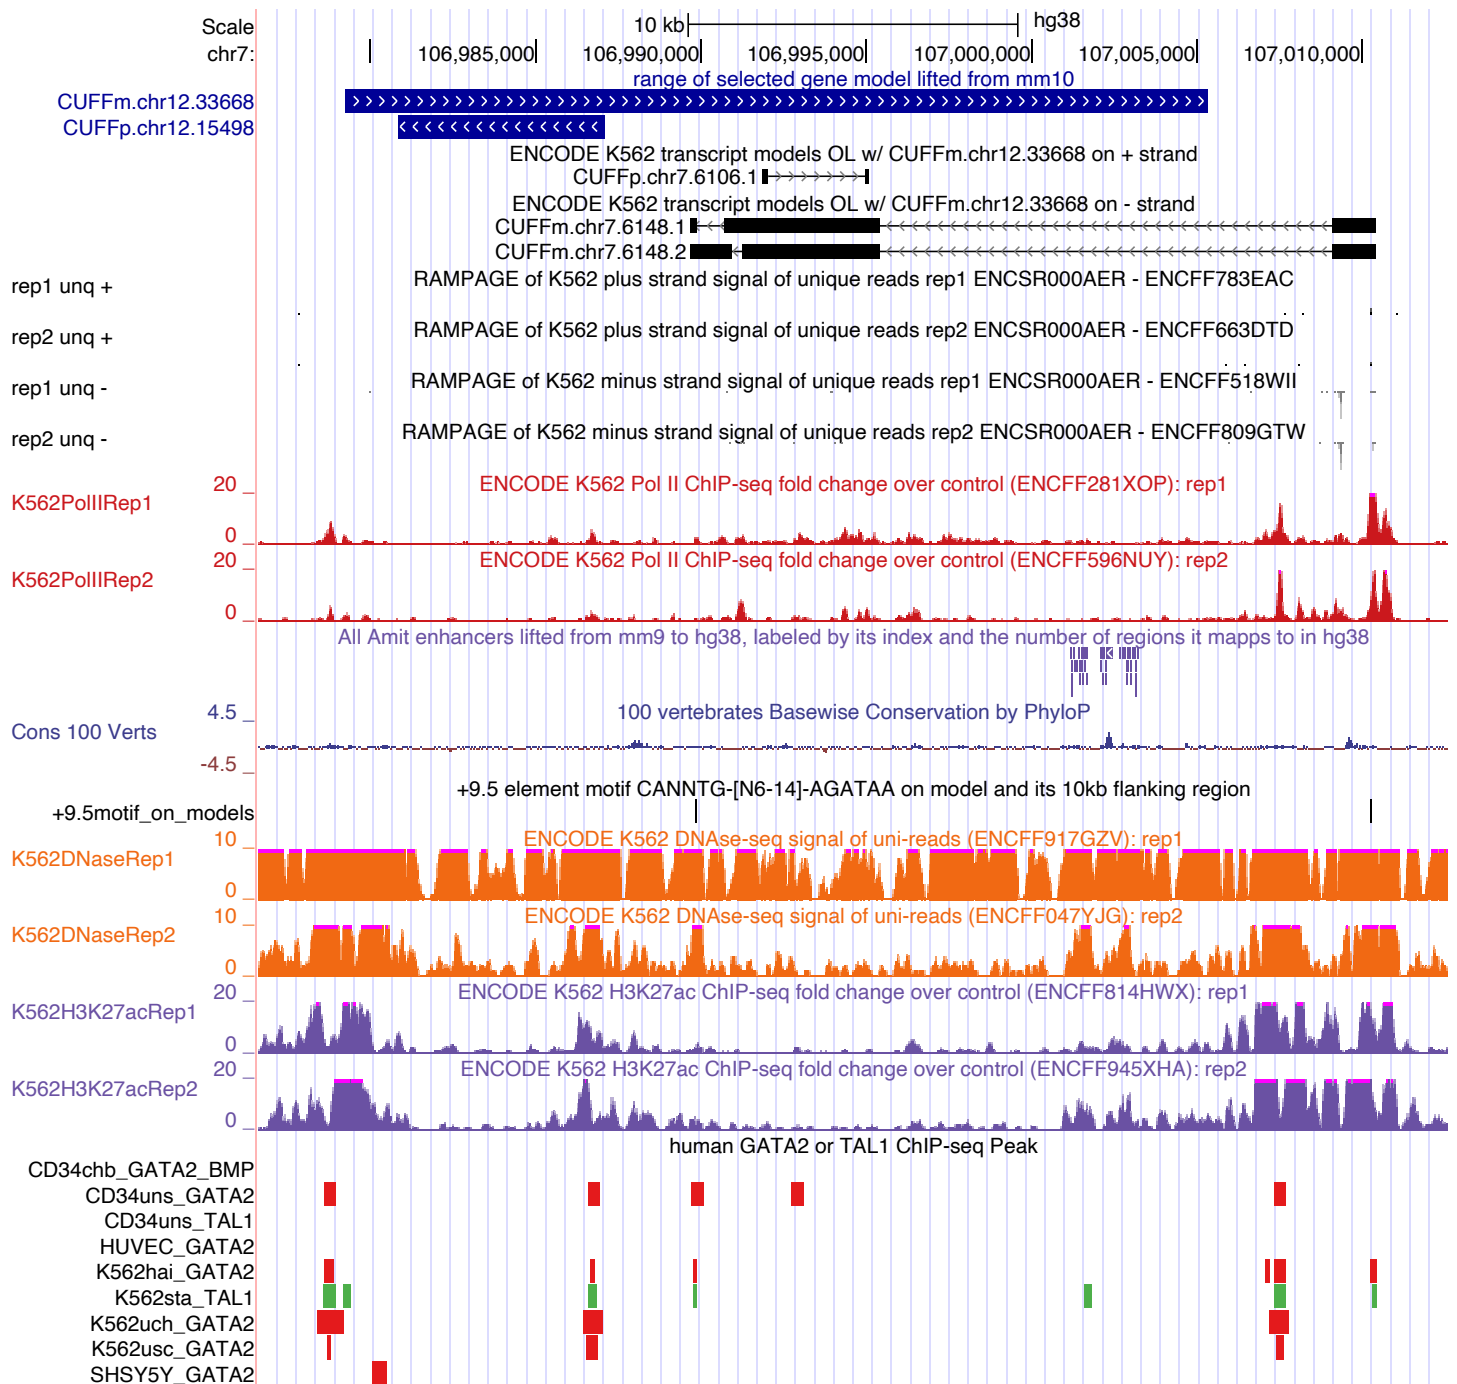

**Supplementary Figure 40. PRAM K562 transcripts and their genomic features.** Transcripts were built from K562 RNA-seq datasets (Supplementary Table 30) and resided in the lifted genomic range of experimentally validated PRAM mouse models CUFFm.chr12.33668. No model was found overlapping with lifted genomic range of CUFFp.chr12.15498.

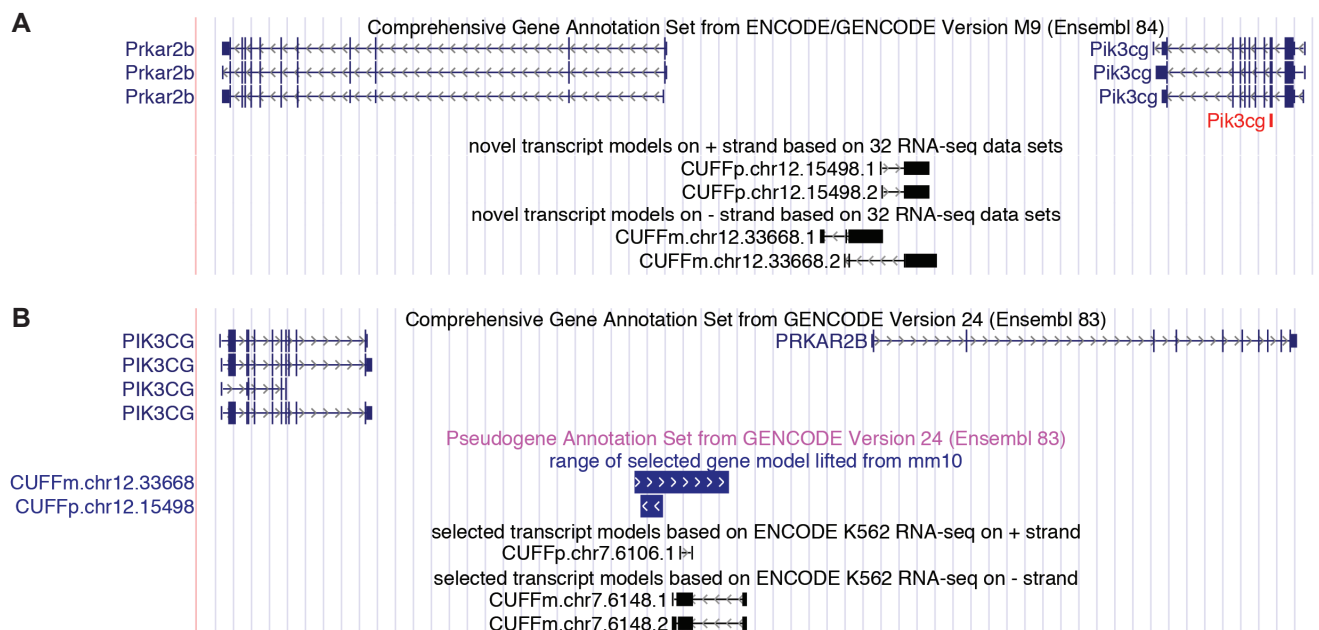

**Supplementary Figure 41. PRAM mouse and K562 transcripts and their neighboring genes.** Synteny was maintained between mouse (**A**) and human (**B**).



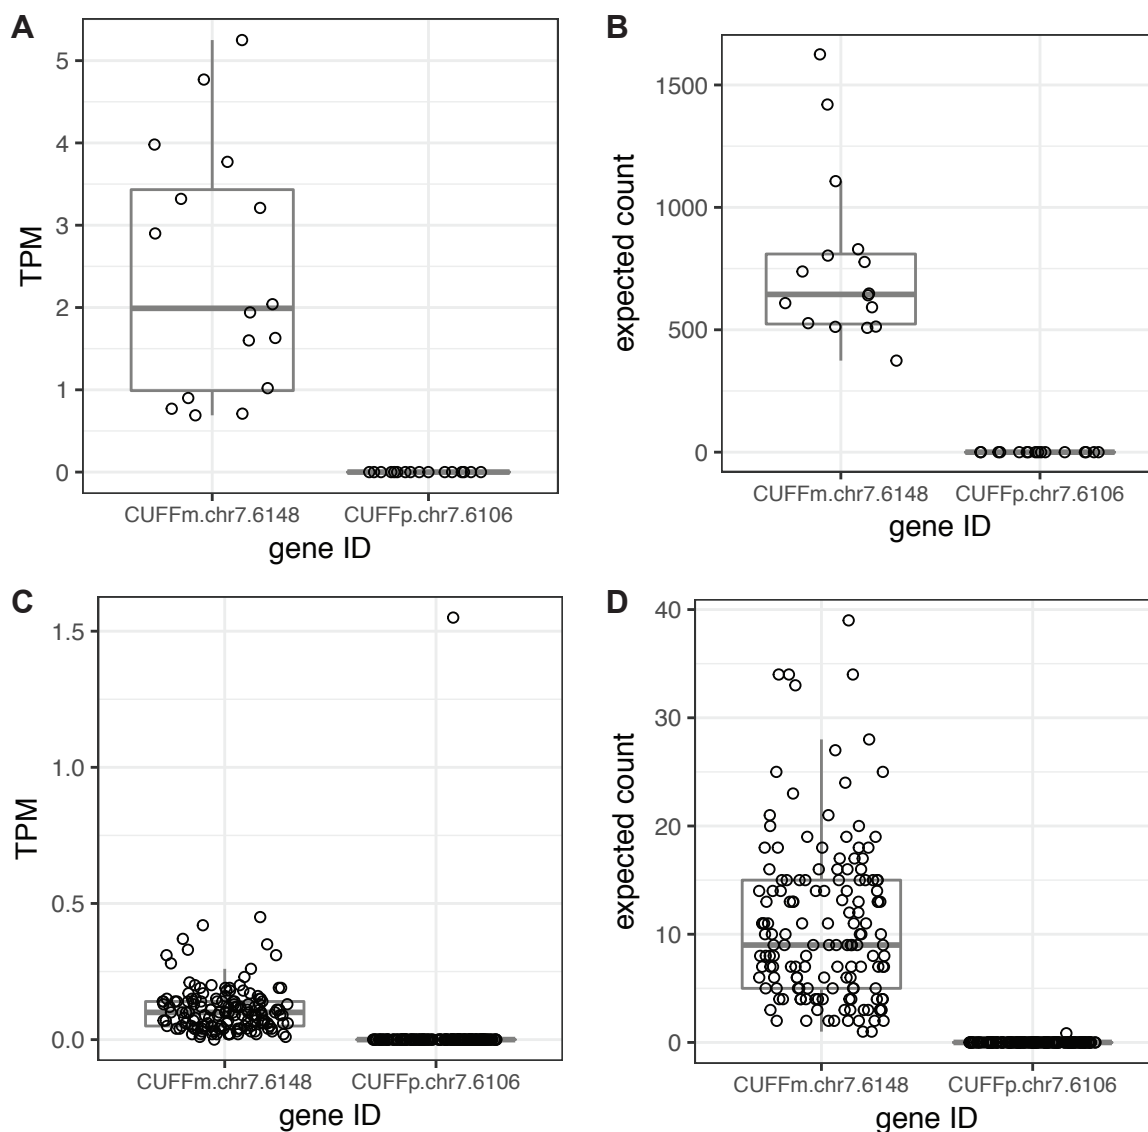

**Supplementary Figure 42. Estimated expression levels and fragment counts for PRAM K562 transcripts.** (A & C) Estimated expression levels in K562 (A) and TCGA-LAML patients (C); (B & D) RNA-seq fragment counts in K562 (B) and TCGA-LAML patients (D).

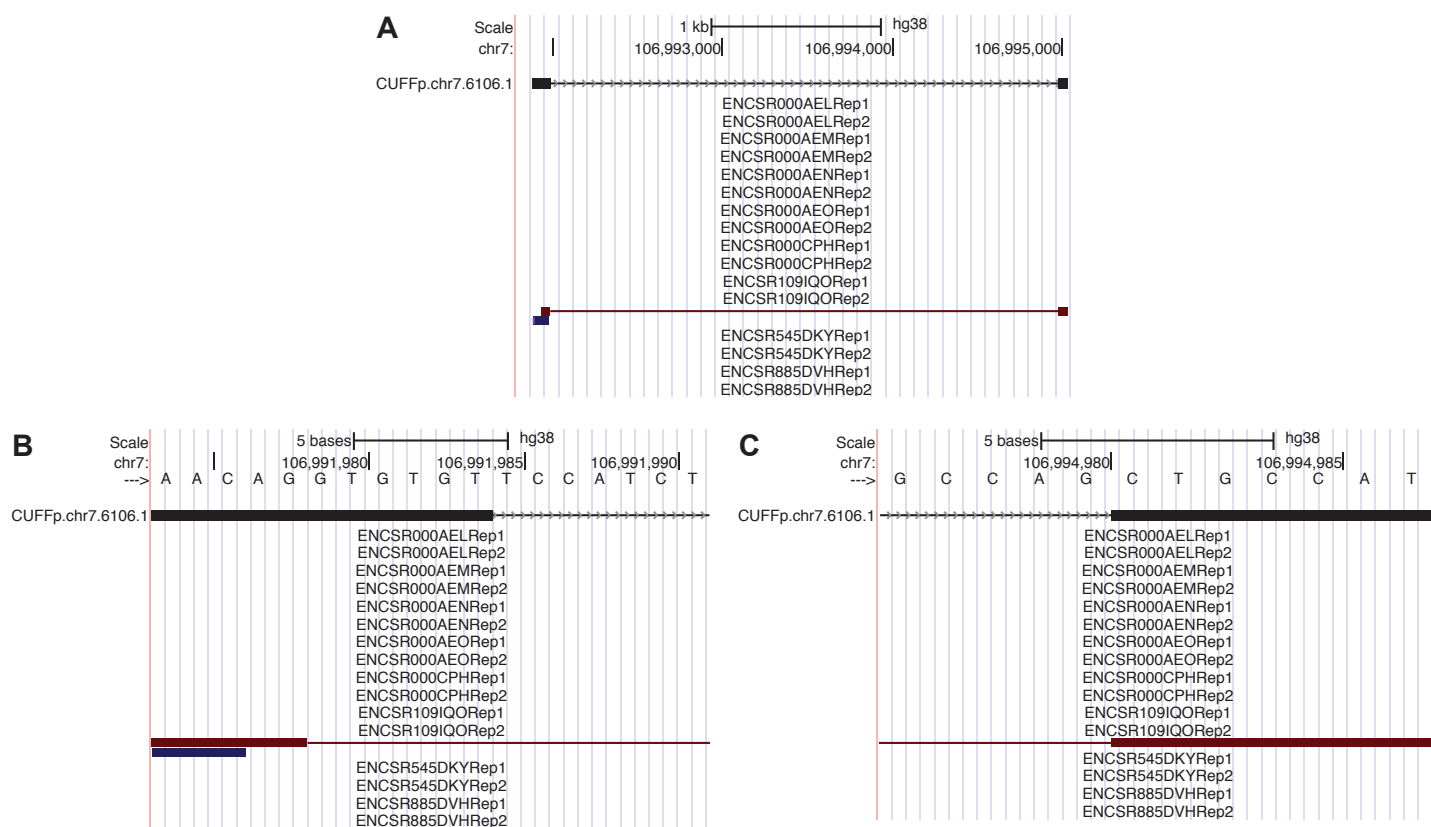

**Supplementary Figure 43. Splice sites and input RNA-seq fragments of CUFFp.chr7.6106.** (A) Full structure of CUFFp.chr7.6106.1 and the paired-end RNA-seq fragment (mate1 in blue and mate2 in red) from ENCSR109IQO's replicate 2. This fragment is the only one from all the sixteen K562 RNA-seq datasets (Supplementary Table 30) that has a splice junction within the range of CUFFp.chr7.6106.1. Therefore, it should be the fragment that CUFFp.chr7.6106.1 was built on. (B) CUFFp.chr7.6106.1's 5'-splice site, which did not fit the RNA-seq fragment and was shifted by six bp, most likely due to Cufflinks's adjustment. (C) CUFFp.chr7.6106.1's 3'-splice site, which agreed with the input RNA-seq fragment.
